# Supplementary material for: Comprehensive genomic profiling of colorectal cancer patients reveals differences in mutational landscapes among clinical and pathological subgroups
Source: PubMed Central journal article supplement (PMC9685809; doi:10.3389/fonc.2022.1000146), 2022-11-10

**Table S3. The tumor location, tumor volume and stage were not associated with gender and age.** Fisher's exact test was used for p value calculation between two groups. Chi-square test was used for p value calculation among three groups.

| Features       | Gender           |                | p value        | Age    |                | p value        |         |
|----------------|------------------|----------------|----------------|--------|----------------|----------------|---------|
|                | Male             | Female         |                | ≥ 50   | < 50           |                |         |
| Tumor location | Left-side colon  | 23<br>(63.89%) | 13<br>(36.11%) | 0.161  | 25<br>(69.44%) | 11<br>(30.56%) | 0.302   |
|                | Right-side colon | 13<br>(41.94%) | 18<br>(58.06%) |        | 21<br>(67.74%) | 10<br>(32.26%) |         |
|                | Rectal           | 39<br>(59.09%) | 27<br>(40.91%) |        | 53<br>(80.30%) | 13<br>(19.70%) |         |
| Tumor volume   | ≥ 5 cm           | 27<br>(50.94%) | 26<br>(49.06%) | 0.367  | 39<br>(73.58%) | 14<br>(26.42%) | 1.000   |
|                | < 5 cm           | 46<br>(60.53%) | 30<br>(39.47%) |        | 57<br>(75.00%) | 19<br>(25.00%) |         |
| Stage          | 0~II             | 35<br>(56.45%) | 27<br>(43.55%) | >0.999 | 49<br>(79.03%) | 13<br>(20.97%) | 0.320   |
|                | III~IV           | 40<br>(56.34%) | 31<br>(43.66%) |        | 50<br>(70.42%) | 21<br>(29.58%) |         |
| MS status      | MSS              | 67<br>(55.37%) | 54<br>(44.63%) | 0.550  | 97<br>(80.17%) | 24<br>(19.83%) | < 0.001 |
|                | MSI              | 8<br>(66.67%)  | 4<br>(33.33%)  |        | 2<br>(16.67%)  | 10<br>(83.33%) |         |

**Table S4. The distribution of *KRAS* G12 and G13 mutations in tumors of different anatomic locations.**

| Locations        | KRAS G13   | KRAS G12    | P value |
|------------------|------------|-------------|---------|
| Right-side colon | 9 (39.13%) | 10 (43.48%) | 0.014   |
| Left-side colon  | 1 (5.88%)  | 13 (76.47%) |         |
| Rectal           | 5 (16.13%) | 24 (77.42%) |         |

**Table S5. Clinicopathological features of the validation cohort.**

| <b>Characteristics</b>                | <b>No. (%)</b> |
|---------------------------------------|----------------|
| <b>No. of patients</b>                | 240            |
| <b>Median age, years (range)</b>      | 60 (19, 84)    |
| <b>Sex</b>                            |                |
| <b>Female</b>                         | 104 (43.3)     |
| <b>Male</b>                           | 136 (56.7)     |
| <b>Primary tumor location</b>         |                |
| <b>Left-sided colon</b>               | 91 (37.92)     |
| <b>Rectal</b>                         | 62 (25.83)     |
| <b>Right-sided colon</b>              | 87 (36.2)      |
| <b>Pathological stage</b>             |                |
| <b>II</b>                             | 112 (46.7)     |
| <b>III</b>                            | 128 (53.3)     |
| <b>Histological type</b>              |                |
| <b>Adenocarcinoma</b>                 | 212 (88.3)     |
| <b>Mucinous/signet-ring carcinoma</b> | 28 (11.7)      |
| <b>Histological grade</b>             |                |
| <b>Moderate/well</b>                  | 180 (75.0)     |
| <b>Poor</b>                           | 60 (25.0)      |
| <b>MSI status</b>                     |                |
| <b>MSI-H</b>                          | 23 (9.6)       |
| <b>MSI-L/MSS</b>                      | 217 (90.4)     |

**Figure S1. The comparison of gene and pathway alterations in early- and late-onset patients.** (A) The comparison of somatic mutations between early- and late-onset CRC patients. (B) The comparison of pathway alterations between early- and late-onset CRC patients. \*:  $p < 0.05$ , \*\*:  $p < 0.01$ , \*\*\*:  $p < 0.001$ , \*\*\*\*:  $p < 0.0001$ .

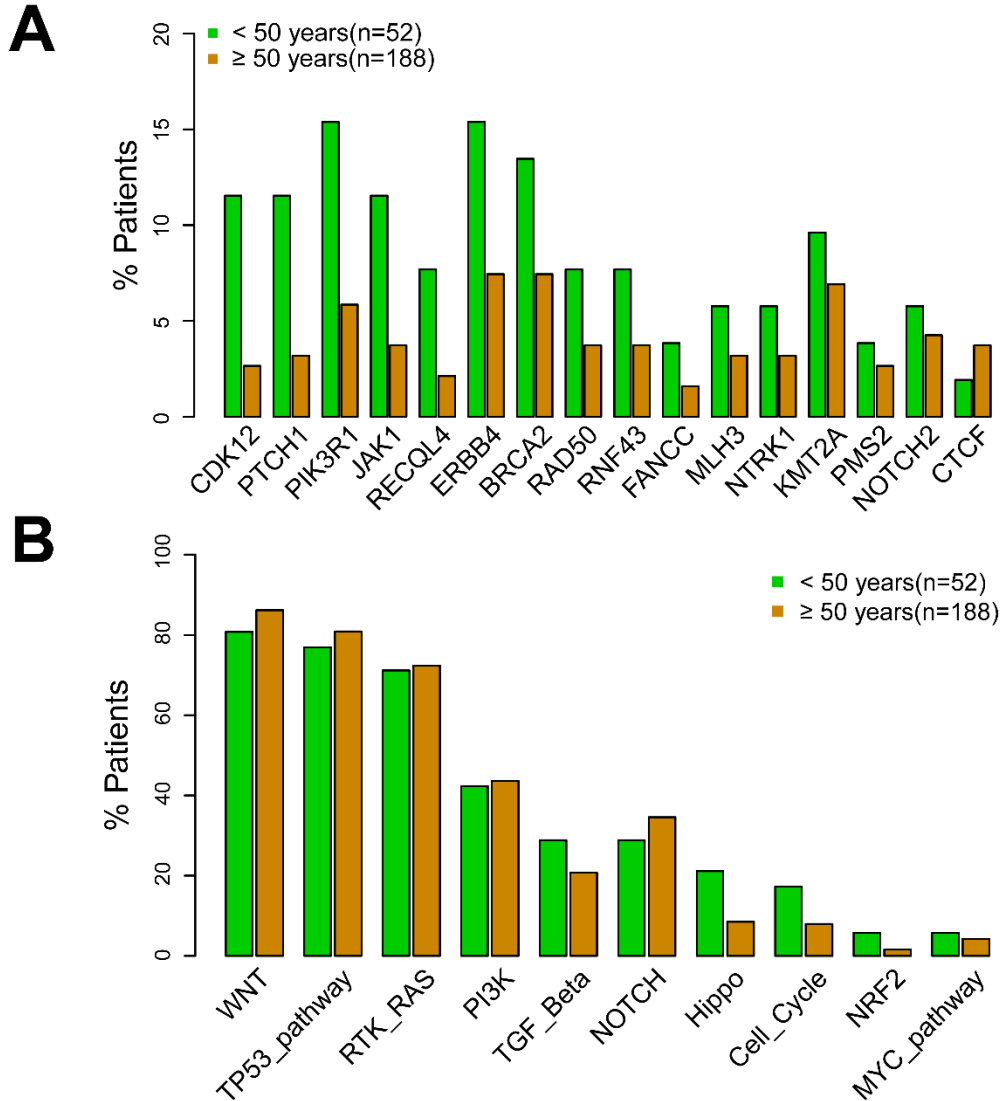

**Figure S2. The comparison of genetic alterations in MSS and MSI patients.** \*:  $p < 0.05$ , \*\*:  $p < 0.01$ , \*\*\*:  $p < 0.001$ , \*\*\*\*:  $p < 0.0001$ .

**A. Comparison of MRR genes in Our Cohort**

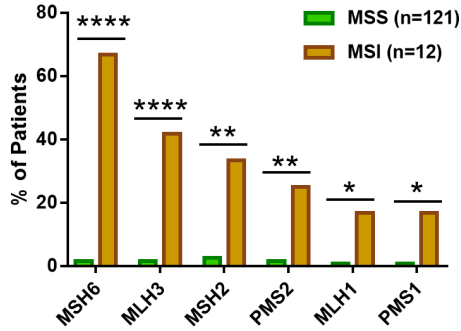

**B. Comparison of Mutation Signatures in Our Cohort**

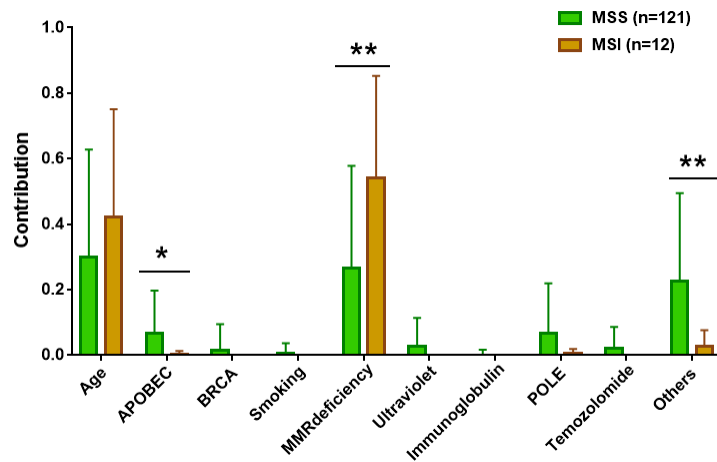

**C. Comparison of Mutation Signatures in the Validation Cohort**

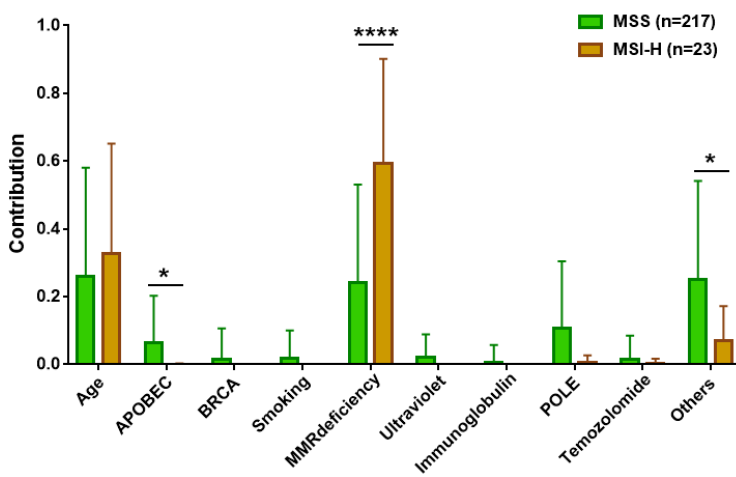

**Figure S3. The comparison of gene and pathway alterations among patients with different tumor anatomic locations.** (A) The comparison of somatic among patients with different tumor anatomic locations. (B) The comparison of pathway alterations among patients with different tumor anatomic locations. \*:  $p < 0.05$ , \*\*:  $p < 0.01$ , \*\*\*:  $p < 0.001$ , \*\*\*\*:  $p < 0.0001$ .

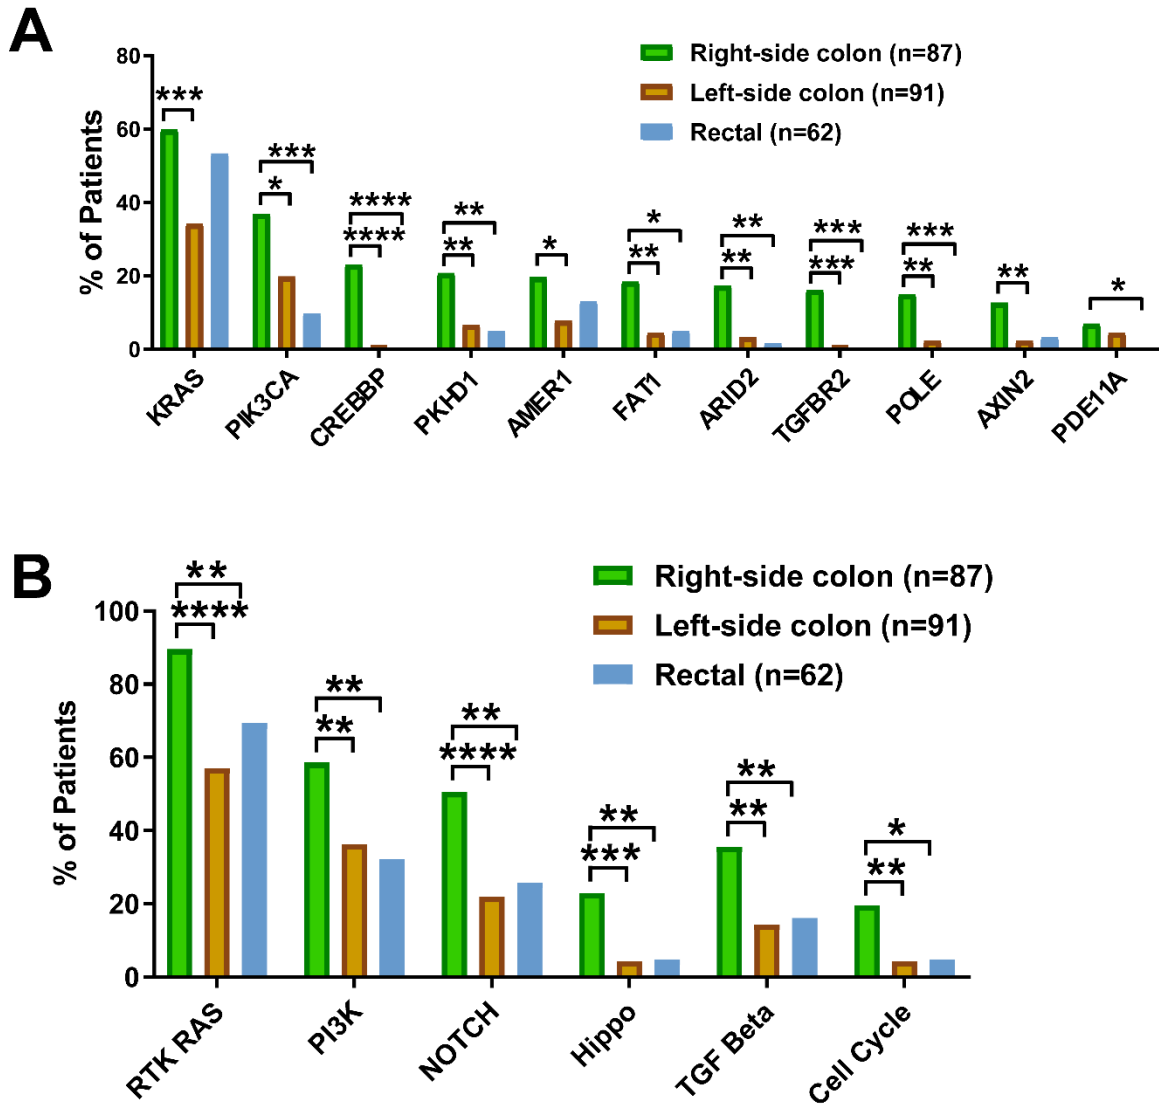

Supplement: DataSheet_3.pdf [file DataSheet_3.pdf]
