# Supplementary material for: Comprehensive genomic profiling of colorectal cancer patients reveals differences in mutational landscapes among clinical and pathological subgroups
Source: PubMed Central journal article supplement (PMC9685809; doi:10.3389/fonc.2022.1000146), 2022-11-10
Supplement: DataSheet_1.pdf [file DataSheet_1.pdf]

**Gene list of 425 gene panel**

| No. | GENE            |
|-----|-----------------|
| 1   | ABCB1 (MDR1)    |
| 2   | ABCC2 (MRP2)    |
| 3   | ADGRB3 (BAI3)   |
| 4   | ADH1B           |
| 5   | AFDN (MLLT4)    |
| 6   | AIP             |
| 7   | AKT1            |
| 8   | AKT2            |
| 9   | AKT3            |
| 10  | ALDH2           |
| 11  | ALK             |
| 12  | AMER1 (FAM123B) |
| 13  | APC             |
| 14  | AR              |
| 15  | ARAF            |
| 16  | ARID1A          |
| 17  | ARID1B          |
| 18  | ARID2           |
| 19  | ARID5B          |
| 20  | ASCL4           |
| 21  | ASXL1           |
| 22  | ATF1            |
| 23  | ATIC            |
| 24  | ATM             |
| 25  | ATR             |
| 26  | ATRX            |
| 27  | AURKA           |
| 28  | AURKB           |
| 29  | AXIN2           |
| 30  | AXL             |
| 31  | B2M             |
| 32  | BAD             |
| 33  | BAK1            |
| 34  | BAP1            |
| 35  | BARD1           |
| 36  | BAX             |
| 37  | BCL2            |
| 38  | BCL2L1 (BIM)    |

|    |               |
|----|---------------|
| 39 | BCR           |
| 40 | BIRC3         |
| 41 | BLM           |
| 42 | BMPR1AA62     |
| 43 | BRAF          |
| 44 | BRCA1         |
| 45 | BRCA2         |
| 46 | BRD4          |
| 47 | BRIP1         |
| 48 | BTG2          |
| 49 | BTK           |
| 50 | BUB1B         |
| 51 | CASP8         |
| 52 | CBL           |
| 53 | CBLB          |
| 54 | CCN6 (WISP3)  |
| 55 | CCND1         |
| 56 | CCNE1         |
| 57 | CD274 (PD-L1) |
| 58 | CD74          |
| 59 | CDA           |
| 60 | CDC73         |
| 61 | CDH1          |
| 62 | CDK10         |
| 63 | CDK12         |
| 64 | CDK4          |
| 65 | CDK6          |
| 66 | CDK8          |
| 67 | CDKN1A        |
| 68 | CDKN1B        |
| 69 | CDKN1C        |
| 70 | CDKN2A        |
| 71 | CDKN2B        |
| 72 | CDKN2C        |
| 73 | CEBPA         |
| 74 | CEP57         |
| 75 | CHD4          |
| 76 | CHD8          |
| 77 | CHEK1         |
| 78 | CHEK2         |
| 79 | CREBBP        |

|     |                 |
|-----|-----------------|
| 80  | CRKL            |
| 81  | CSF1R           |
| 82  | CTCF            |
| 83  | CTLA4           |
| 84  | CTNNB1          |
| 85  | CUL3            |
| 86  | CUX1            |
| 87  | CXCR4           |
| 88  | CYLD            |
| 89  | CYP19A1         |
| 90  | CYP2A13         |
| 91  | CYP2A6          |
| 92  | CYP2A7          |
| 93  | CYP2B6*6        |
| 94  | CYP2C19*2       |
| 95  | CYP2C9*3        |
| 96  | CYP2D6          |
| 97  | CYP3A4*4        |
| 98  | CYP3A5          |
| 99  | CYSLTR2         |
| 100 | DAXX            |
| 101 | DDR2            |
| 102 | DENND1A         |
| 103 | DHFR            |
| 104 | DICER1          |
| 105 | DLL3            |
| 106 | DNMT3A          |
| 107 | DOT1L           |
| 108 | DPYD            |
| 109 | DTL (CDT2)      |
| 110 | DUSP2           |
| 111 | EGFR            |
| 112 | EIF1AX          |
| 113 | EMSY (c11orf30) |
| 114 | EP300           |

|     |                 |
|-----|-----------------|
| 115 | EPAS1           |
| 116 | EPCAM           |
| 117 | EPHA2           |
| 118 | EPHA3           |
| 119 | EPHA5           |
| 120 | ERBB2 (HER2)    |
| 121 | ERBB3           |
| 122 | ERBB4           |
| 123 | ERBIN (ERBB2IP) |
| 124 | ERCC1           |
| 125 | ERCC2           |
| 126 | ERCC3           |
| 127 | ERCC4           |
| 128 | ERCC5           |
| 129 | ESR1            |
| 130 | ETV1            |
| 131 | ETV4            |
| 132 | ETV5            |
| 133 | ETV6            |
| 134 | EWSR1           |
| 135 | EXT1            |
| 136 | EXT2            |
| 137 | EZH2            |
| 138 | EZR             |
| 139 | FANCA           |
| 140 | FANCC           |
| 141 | FANCD2          |
| 142 | FANCE           |
| 143 | FANCF           |
| 144 | FANCG           |
| 145 | FANCI           |
| 146 | FANCL           |
| 147 | FANCM           |
| 148 | FAT1            |
| 149 | FBXW7           |
| 150 | FGF19           |
| 151 | FGFR1           |
| 152 | FGFR2           |
| 153 | FGFR3           |
| 154 | FGFR4           |
| 155 | FH              |

|     |               |
|-----|---------------|
| 156 | FLCN          |
| 157 | FLT1 (VEGFR1) |
| 158 | FLT3          |
| 159 | FLT4          |
| 160 | FOXA1         |
| 161 | FOXL2         |
| 162 | FOXP1         |
| 163 | FRG1          |
| 164 | GATA1         |
| 165 | GATA2         |
| 166 | GATA3         |
| 167 | GATA4         |
| 168 | GATA6         |
| 169 | GNA11         |
| 170 | GNAQ          |
| 171 | GNAS          |
| 172 | GRIN2A        |
| 173 | GRM3          |
| 174 | GRM8          |
| 175 | GSTM1         |
| 176 | GSTM4         |
| 177 | GSTP1         |
| 178 | GSTT1         |
| 179 | HDAC2         |
| 180 | HDAC9         |
| 181 | HGF           |
| 182 | HLA-A         |
| 183 | HNF1A         |
| 184 | HNF1B         |
| 185 | HRAS          |
| 186 | IDH1          |
| 187 | IDH2          |
| 188 | IFNA6         |
| 189 | IFNB1         |
| 190 | IFNE          |
| 191 | IFNG          |
| 192 | IFNGR1        |
| 193 | IFNGR2        |
| 194 | IGF1R         |
| 195 | IGF2          |
| 196 | IKBKE         |
| 197 | IKZF1         |

|     |               |
|-----|---------------|
| 198 | IL7R          |
| 199 | INPP4B        |
| 200 | IRF2          |
| 201 | JAK1          |
| 202 | JAK2          |
| 203 | JAK3          |
| 204 | JARID2        |
| 205 | JUN           |
| 206 | KDM5A         |
| 207 | KDR (VEGFR2)  |
| 208 | KEAP1         |
| 209 | KIF1B         |
| 210 | KIT           |
| 211 | KITLG         |
| 212 | KLLN          |
| 213 | KMT2A (MLL)   |
| 214 | KMT2B         |
| 215 | KMT2C         |
| 216 | KMT2D (MLL2)  |
| 217 | KRAS          |
| 218 | LHCGR         |
| 219 | LMO1          |
| 220 | LRP1B         |
| 221 | LYN           |
| 222 | LZTR1         |
| 223 | MAP2K1 (MEK1) |
| 224 | MAP2K2 (MEK2) |
| 225 | MAP2K4        |
| 226 | MAP3K1        |
| 227 | MAP3K4        |
| 228 | MAX           |
| 229 | MCL1          |
| 230 | MDM2          |
| 231 | MDM4          |
| 232 | MECOM         |
| 233 | MED12         |
| 234 | MEF2B         |
| 235 | MEN1          |
| 236 | MET           |

|     |                |
|-----|----------------|
| 237 | MGMT           |
| 238 | MITF           |
| 239 | MLH1           |
| 240 | MLH3           |
| 241 | MLLT1          |
| 242 | MLLT3          |
| 243 | MPL            |
| 244 | MRE11 (MRE11A) |
| 245 | MSH2           |
| 246 | MSH6           |
| 247 | MTHFR          |
| 248 | MTOR           |
| 249 | MUTYH          |
| 250 | MYC            |
| 251 | MYCL (MYCL1)   |
| 252 | MYCN           |
| 253 | MYD88          |
| 254 | MYH9           |
| 255 | NAT1           |
| 256 | NBN            |
| 257 | NCOR1          |
| 258 | NF1            |
| 259 | NF2            |
| 260 | NFE2L2         |
| 261 | NFKBIA         |
| 262 | NKX2-1         |
| 263 | NOTCH1         |
| 264 | NOTCH2         |
| 265 | NOTCH3         |
| 266 | NPM1           |
| 267 | NQO1           |
| 268 | NRAS           |
| 269 | NRG1           |
| 270 | NSD1           |
| 271 | NTRK1          |
| 272 | NTRK2          |
| 273 | NTRK3          |
| 274 | NUTM1          |
| 275 | PAK3           |
| 276 | PALB2          |
| 277 | PALLD          |
| 278 | PARP1          |

|     |                  |
|-----|------------------|
| 279 | PARP2            |
| 280 | PAX5             |
| 281 | PBRM1            |
| 282 | PDCD1 (PD1)      |
| 283 | PDCD1LG2 (PD-L2) |
| 284 | PDE11A           |
| 285 | PDGFRA           |
| 286 | PDGFRB           |
| 287 | PDK1             |
| 288 | PGR              |
| 289 | PHOX2B           |
| 290 | PIK3C3           |
| 291 | PIK3CA           |
| 292 | PIK3CD           |
| 293 | PIK3R1           |
| 294 | PIK3R2           |
| 295 | PKHD1            |
| 296 | PLAG1            |
| 297 | PLCB4            |
| 298 | PLK1             |
| 299 | PMS1             |
| 300 | PMS2             |
| 301 | POLD1            |
| 302 | POLD3            |
| 303 | POLE             |
| 304 | POLH             |
| 305 | POT1             |
| 306 | PPARD            |
| 307 | PPP2R1A          |
| 308 | PRDM1            |
| 309 | PREX2            |
| 310 | PRF1             |
| 311 | PRKACA           |
| 312 | PRKAR1A          |
| 313 | PRKCI            |
| 314 | PRKDC            |
| 315 | PRKN (PARK2)     |
| 316 | PRSS1            |
| 317 | PRSS3            |
| 318 | PTCH1            |



|     |                 |
|-----|-----------------|
| 319 | PTEN            |
| 320 | PTK2            |
| 321 | PTPN11          |
| 322 | PTPN13          |
| 323 | QKI             |
| 324 | RAC1            |
| 325 | RAC3            |
| 326 | RAD50           |
| 327 | RAD51           |
| 328 | RAD51B          |
| 329 | RAD51C          |
| 330 | RAD51D          |
| 331 | RAD54L          |
| 332 | RAF1            |
| 333 | RARA            |
| 334 | RARG            |
| 335 | RASGEF1A        |
| 336 | RB1             |
| 337 | RECQL4          |
| 338 | RELN            |
| 339 | RET             |
| 340 | RHOA            |
| 341 | RICTOR          |
| 342 | RNF43           |
| 343 | ROS1            |
| 344 | RPTOR           |
| 345 | RRM1            |
| 346 | RUNX1           |
| 347 | RUNX1T1         |
| 348 | SBDS            |
| 349 | SDC4            |
| 350 | SDHA            |
| 351 | SDHB            |
| 352 | SDHC            |
| 353 | SDHD            |
| 354 | SEPTIN9 (SEPT9) |
| 355 | SETBP1          |
| 356 | SETD2           |
| 357 | SF3B1           |
| 358 | SGK1            |
| 359 | SKP2            |

|     |           |
|-----|-----------|
| 360 | SLC34A2   |
| 361 | SLC3A2    |
| 362 | SMAD2     |
| 363 | SMAD3     |
| 364 | SMAD4     |
| 365 | SMAD7     |
| 366 | SMARCA4   |
| 367 | SMARCB1   |
| 368 | SMO       |
| 369 | SOCS1     |
| 370 | SOS1      |
| 371 | SOX2      |
| 372 | SPOP      |
| 373 | SPRED1    |
| 374 | SPRY4     |
| 375 | SRC       |
| 376 | SRSF2     |
| 377 | SRY       |
| 378 | STAG2     |
| 379 | STAT3     |
| 380 | STK11     |
| 381 | STMN1     |
| 382 | SUFU      |
| 383 | TACC3     |
| 384 | TAP1      |
| 385 | TAP2      |
| 386 | TEK       |
| 387 | TEKT4     |
| 388 | TERC      |
| 389 | TERT      |
| 390 | TET2      |
| 391 | TGFBR2    |
| 392 | THADA     |
| 393 | TMEM127   |
| 394 | TMPRSS2   |
| 395 | TNFAIP3   |
| 396 | TNFRSF11A |
| 397 | TNFRSF14  |
| 398 | TNFRSF19  |

|     |         |
|-----|---------|
| 399 | TNFSF11 |
| 400 | TOP1    |
| 401 | TOP2A   |
| 402 | TP53    |
| 403 | TP63    |
| 404 | TPMT    |
| 405 | TSC1    |
| 406 | TSC2    |
| 407 | TSHR    |
| 408 | TTF1    |
| 409 | TUBB3   |
| 410 | TYMS    |
| 411 | U2AF1   |
| 412 | UGT1A1  |
| 413 | VAMP2   |
| 414 | VEGFA   |
| 415 | VHL     |
| 416 | WAS     |
| 417 | WRN     |
| 418 | WT1     |
| 419 | XPA     |
| 420 | XPC     |
| 421 | XRCC1   |
| 422 | XRCC2   |
| 423 | YAP1    |
| 424 | ZNF217  |
| 425 | ZNF703  |
