# Supplementary material for: Comprehensive genomic profiling of colorectal cancer patients reveals differences in mutational landscapes among clinical and pathological subgroups
Source: PubMed Central journal article supplement (PMC9685809; doi:10.3389/fonc.2022.1000146), 2022-11-10
Supplement: DataSheet_2.pdf [file DataSheet_2.pdf]

**Table S2. The mutation list of tumor samples**

#Patient\_No=Patient Number

#Gene=HGNC Gene Symbol

#Chr\_start=Start position on the Chromosome. Chromosome:Start

#Chr\_end=End position on the Chromosome. Chromosome:End

#Ref=Reference Allele

#Alt=Altered Allele

#Variant\_Classification=Classification of variants

#AAChange=Change of Amino Acid

#AF=Proportion of Altered Allele

| Patient_No | Gene   | AAChange              | Variant Classification |
|------------|--------|-----------------------|------------------------|
| P1         | ARID1A | c.5329G>T(p.E1777*)   | STOP GAINED            |
| P1         | PDGFRB |                       | Amplification          |
| P1         | KMT2B  | c.4738C>A(p.Q1580K)   | MISSENSE               |
| P1         | APC    | c.646C>T(p.R216*)     | STOP GAINED            |
| P1         | FANCD2 | c.3139G>T(p.G1047*)   | STOP GAINED            |
| P1         | EXT2   | c.1084T>G(p.S362A)    | MISSENSE               |
| P1         | ERCC4  | c.1177G>A(p.A393T)    | MISSENSE               |
| P1         | CSF1R  |                       | Amplification          |
| P1         | MTOR   | c.5930C>A(p.T1977K)   | MISSENSE               |
| P1         | APC    | c.8192C>A(p.P2731H)   | MISSENSE               |
| P1         | RB1    | c.2206C>A(p.Q736K)    | MISSENSE               |
| P1         | JAK1   | c.2593G>T(p.V865L)    | MISSENSE               |
| P1         | KRAS   | c.34G>T(p.G12C)       | MISSENSE               |
| P1         | APC    | c.734C>A(p.S245*)     | STOP GAINED            |
| P1         | ERBB4  | c.2685G>T(p.R895S)    | MISSENSE               |
| P1         | FBXW7  | c.608C>A(p.S203*)     | STOP GAINED            |
| P1         | TP53   | c.725G>A(p.C242Y)     | MISSENSE               |
| P1         | CSF1R  |                       | Amplification          |
| P1         | PDGFRB |                       | Amplification          |
| P1         | CEBPA  |                       | Deletion               |
| P2         | FGFR1  |                       | Amplification          |
| P2         | FGFR1  | FGFR1:exon2~IGR (upst | FUSION                 |
| P2         | APC    | c.3944C>A(p.S1315*)   | STOP GAINED            |
| P2         | LRP1B  | c.2504-1G>C           | SPLICE                 |
| P2         | MET    | c.1447T>A(p.S483T)    | MISSENSE               |
| P2         | AXIN2  | c.330C>A(p.F110L)     | MISSENSE               |
| P2         | POLH   | c.2083C>T(p.R695C)    | MISSENSE               |
| P2         | KLLN   | c.428_433delCCCGCC(p  | INFRAME INDEL          |
| P2         | FGFR1  |                       | Amplification          |
| P2         | FGFR1  |                       | Amplification          |
| P2         | FGFR1  |                       | Amplification          |
| P2         | FGFR1  |                       | Amplification          |
| P3         | MAP2K4 | c.439A>G(p.M147V)     | MISSENSE               |
| P3         | PKHD1  | c.5684A>G(p.E1895G)   | MISSENSE               |
| P3         | BRAF   | c.1799T>A(p.V600E)    | MISSENSE               |
| P3         | SMAD4  | c.250-1G>C            | SPLICE                 |

|    |         |                        |               |
|----|---------|------------------------|---------------|
| P3 | TP53    | c.524G>A(p.R175H)      | MISSENSE      |
| P3 | PTEN    |                        | Deletion      |
| P3 | CDKN2B  |                        | Deletion      |
| P4 | FGFR2   | c.1393G>A(p.E465K)     | MISSENSE      |
| P4 | PRKCI   | c.396G>T(p.W132C)      | MISSENSE      |
| P4 | CHD4    | c.3748G>A(p.D1250N)    | MISSENSE      |
| P4 | KEAP1   | c.701G>C(p.R234P)      | MISSENSE      |
| P4 | CDH1    | c.2216A>T(p.E739V)     | MISSENSE      |
| P5 | APC     | c.3934G>T(p.G1312*)    | STOP GAINED   |
| P5 | PIK3R1  | c.41A>T(p.Y14F)        | MISSENSE      |
| P5 | FANCD2  | c.2041A>G(p.K681E)     | MISSENSE      |
| P5 | SMAD4   | c.1087T>G(p.C363G)     | MISSENSE      |
| P5 | EP300   | c.1762G>A(p.V588I)     | MISSENSE      |
| P5 | TP53    | c.824G>A(p.C275Y)      | MISSENSE      |
| P5 | KRAS    | c.38G>A(p.G13D)        | MISSENSE      |
| P5 | CDK6    | c.7_9delAAG(p.K3del)   | INFRAME INDEL |
| P5 | PIK3R1  | c.40dupT(p.Y14Lfs*2)   | FRAMESHIFT    |
| P5 | ERBB4   | c.305delT(p.L102Yfs*2) | FRAMESHIFT    |
| P6 | TMPRSS2 | c.145G>A(p.V49M)       | MISSENSE      |
| P6 | NSD1    | c.404C>T(p.S135F)      | MISSENSE      |
| P6 | TP53    | c.743G>A(p.R248Q)      | MISSENSE      |
| P6 | SMAD4   | c.1484T>C(p.L495P)     | MISSENSE      |
| P6 | ATM     | c.7751_7754delCTAA(p   | FRAMESHIFT    |
| P6 | APC     | c.4395delT(p.S1465Rfs' | FRAMESHIFT    |
| P7 | SLC3A2  | c.899delA(p.K300Rfs*3  | FRAMESHIFT    |
| P7 | AMER1   | c.2074G>A(p.E692K)     | MISSENSE      |
| P7 | AMER1   | c.1921C>T(p.R641*)     | STOP GAINED   |
| P7 | SMARCB1 | c.946C>T(p.R316W)      | MISSENSE      |
| P7 | SMARCA4 | c.442G>A(p.G148R)      | MISSENSE      |
| P7 | RECQL4  | c.3349G>A(p.G1117R)    | MISSENSE      |
| P7 | KMT2A   | c.2318delC(p.P773Rfs*; | FRAMESHIFT    |
| P7 | NSD1    | c.2175_2176invGT(p.S7  | MISSENSE      |
| P7 | CYLD    | c.64delT(p.Y22Tfs*25)  | FRAMESHIFT    |
| P7 | RNF43   | c.1976delG(p.G659Vfs*  | FRAMESHIFT    |
| P7 | TGFBR2  | c.317T>C(p.L106P)      | MISSENSE      |
| P7 | LZTR1   | c.27delG(p.Q10Rfs*15)  | FRAMESHIFT    |
| P7 | MAP2K4  | c.961G>A(p.V321M)      | MISSENSE      |
| P7 | EP300   | c.1943G>A(p.R648Q)     | MISSENSE      |
| P7 | TGFBR2  | c.382_383delAA(p.K12   | FRAMESHIFT    |
| P7 | BRAF    | c.1682C>T(p.A561V)     | MISSENSE      |
| P7 | TTF1    | c.2671G>A(p.A891T)     | MISSENSE      |
| P7 | RPTOR   | c.2362C>T(p.R788C)     | MISSENSE      |
| P7 | BRCA2   | c.9097delA(p.T3033Lfs' | FRAMESHIFT    |
| P7 | JARID2  | c.1186dupG(p.A396Gfs   | FRAMESHIFT    |
| P7 | SRC     | c.659G>A(p.R220H)      | MISSENSE      |
| P7 | B2M     | c.45_48delTTCT(p.S16A  | FRAMESHIFT    |
| P7 | CDKN2A  | c.335G>A(p.R112H)      | MISSENSE      |

|    |         |                        |             |
|----|---------|------------------------|-------------|
| P7 | TERT    | c.1931C>T(p.T644M)     | MISSENSE    |
| P7 | FOXP1   | c.1328A>G(p.Y443C)     | MISSENSE    |
| P7 | TGFBR2  | c.321dupC(p.Y108Lfs*3  | FRAMESHIFT  |
| P7 | PRKCI   | c.30G>A(p.M10I)        | MISSENSE    |
| P7 | PTCH1   | c.2082G>T(p.Q694H)     | MISSENSE    |
| P7 | CASP8   | c.793C>T(p.R265W)      | MISSENSE    |
| P7 | APC     | c.6747dupA(p.G2250Rf   | FRAMESHIFT  |
| P7 | CHD4    | c.2923C>T(p.R975C)     | MISSENSE    |
| P7 | RRM1    | c.902T>C(p.L301P)      | MISSENSE    |
| P7 | NRG1    | c.1361delC(p.P454Lfs*1 | FRAMESHIFT  |
| P7 | NSD1    | c.1034C>T(p.P345L)     | MISSENSE    |
| P7 | PARK2   | c.572G>A(p.R191Q)      | MISSENSE    |
| P7 | ARID1B  | c.4556G>A(p.R1519H)    | MISSENSE    |
| P7 | NAT1    | c.98G>A(p.R33Q)        | MISSENSE    |
| P7 | EP300   | c.5817G>T(p.Q1939H)    | MISSENSE    |
| P7 | DOT1L   | c.3097G>A(p.G1033S)    | MISSENSE    |
| P7 | RNF43   | c.375+2T>C             | SPLICE      |
| P7 | TSC1    | c.1838C>A(p.P613Q)     | MISSENSE    |
| P7 | BAX     | c.130G>A(p.E44K)       | MISSENSE    |
| P7 | CDK12   | c.893G>A(p.R298Q)      | MISSENSE    |
| P7 | RAD54L  | c.433G>A(p.V145I)      | MISSENSE    |
| P7 | FLT4    | c.1924delC(p.R642Afs*  | FRAMESHIFT  |
| P7 | KDR     | c.3773C>T(p.T1258M)    | MISSENSE    |
| P7 | CREBBP  | c.3668G>A(p.R1223H)    | MISSENSE    |
| P7 | TGFBR2  | c.1198C>T(p.L400F)     | MISSENSE    |
| P7 | BAP1    | c.175C>T(p.R59W)       | MISSENSE    |
| P7 | FBXW7   | c.1393C>T(p.R465C)     | MISSENSE    |
| P7 | B2M     | c.43_44delCT(p.L15Ffs* | FRAMESHIFT  |
| P7 | POT1    | c.1892A>G(p.E631G)     | MISSENSE    |
| P7 | ASXL1   | c.1934dupG(p.G646Wf:   | FRAMESHIFT  |
| P7 | PRDM1   | c.126G>T(p.E42D)       | MISSENSE    |
| P7 | RAD50   | c.1722dupA(p.Q575Tfs'  | FRAMESHIFT  |
| P7 | ATM     | c.9023G>A(p.R3008H)    | MISSENSE    |
| P7 | MSH2    | c.1288A>T(p.K430*)     | STOP GAINED |
| P7 | NBN     | c.797C>T(p.P266L)      | MISSENSE    |
| P7 | KMT2B   | c.3057delA(p.G1020Afs  | FRAMESHIFT  |
| P7 | BAX     | c.34_34+1insT(p.G12Vf  | FRAMESHIFT  |
| P7 | GRIN2A  | c.2147C>T(p.A716V)     | MISSENSE    |
| P7 | SMARCA4 | c.2729C>T(p.T910M)     | MISSENSE    |
| P7 | DOT1L   | c.3694G>A(p.A1232T)    | MISSENSE    |
| P7 | RNF43   | c.349_350delCGinsA(p.  | FRAMESHIFT  |
| P7 | POLD1   | c.2158G>A(p.V720I)     | MISSENSE    |
| P7 | BRD4    | c.3178C>T(p.R1060C)    | MISSENSE    |
| P7 | PLCB4   | c.685dupA(p.I229Nfs*7  | FRAMESHIFT  |
| P7 | PIK3C3  | c.1459T>C(p.S487P)     | MISSENSE    |
| P7 | QKI     | c.401delA(p.K134Rfs*1  | FRAMESHIFT  |
| P7 | MSH6    |                        | Deletion    |

|    |          |                     |             |
|----|----------|---------------------|-------------|
| P8 | NF1      | c.2281G>A(p.A761T)  | MISSENSE    |
| P8 | AURKA    | c.481C>T(p.L161F)   | MISSENSE    |
| P8 | GRIN2A   | c.3475C>T(p.R1159C) | MISSENSE    |
| P8 | RAF1     | c.770C>T(p.S257L)   | MISSENSE    |
| P8 | KMT2C    | c.2690G>A(p.R897Q)  | MISSENSE    |
| P8 | ROS1     | c.3025G>A(p.E1009K) | MISSENSE    |
| P8 | NFE2L2   | c.938T>G(p.L313R)   | MISSENSE    |
| P8 | CDK12    | c.923G>T(p.R308I)   | MISSENSE    |
| P8 | POLE     | c.857C>G(p.P286R)   | MISSENSE    |
| P8 | APC      | c.1307A>C(p.N436T)  | MISSENSE    |
| P8 | GATA1    | c.1117T>C(p.S373P)  | MISSENSE    |
| P8 | GRIN2A   | c.581G>A(p.S194N)   | MISSENSE    |
| P8 | RHOA     | c.365G>A(p.R122Q)   | MISSENSE    |
| P8 | APC      | c.694C>T(p.R232*)   | STOP GAINED |
| P8 | SMARCA4  | c.2644G>A(p.E882K)  | MISSENSE    |
| P8 | BARD1    | c.775G>T(p.D259Y)   | MISSENSE    |
| P8 | RET      | c.2083C>T(p.P695S)  | MISSENSE    |
| P8 | ROS1     | c.367A>C(p.N123H)   | MISSENSE    |
| P8 | C11orf30 | c.2648C>T(p.S883L)  | MISSENSE    |
| P8 | FLT1     | c.2926A>C(p.S976R)  | MISSENSE    |
| P8 | ERCC5    | c.628G>T(p.E210*)   | STOP GAINED |
| P8 | ATR      | c.5942A>C(p.E1981A) | MISSENSE    |
| P8 | PDGFRA   | c.649G>T(p.E217*)   | STOP GAINED |
| P8 | FANCC    | c.956C>T(p.T319M)   | MISSENSE    |
| P8 | TOP2A    | c.2719T>G(p.Y907D)  | MISSENSE    |
| P8 | ERCC5    | c.211C>T(p.R71C)    | MISSENSE    |
| P8 | BRCA2    | c.5782G>T(p.E1928*) | STOP GAINED |
| P8 | NBN      | c.904C>T(p.L302F)   | MISSENSE    |
| P8 | CYSLTR2  | c.626G>A(p.G209D)   | MISSENSE    |
| P8 | NOTCH1   | c.6376G>A(p.G2126R) | MISSENSE    |
| P8 | BRD4     | c.297G>T(p.K99N)    | MISSENSE    |
| P8 | TAP2     | c.1795G>T(p.D599Y)  | MISSENSE    |
| P8 | CBLB     | c.2850G>T(p.K950N)  | MISSENSE    |
| P8 | TAP2     | c.1620C>A(p.C540*)  | STOP GAINED |
| P8 | PMS2     | c.1862C>A(p.S621Y)  | MISSENSE    |
| P8 | KMT2A    | c.9262C>T(p.L3088F) | MISSENSE    |
| P8 | ROS1     | c.3489G>T(p.K1163N) | MISSENSE    |
| P8 | PIK3R1   | c.1042C>T(p.R348*)  | STOP GAINED |
| P8 | FLCN     | c.50G>A(p.R17H)     | MISSENSE    |
| P8 | TET2     | c.3310T>G(p.F1104V) | MISSENSE    |
| P8 | PGR      | c.1817G>T(p.R606I)  | MISSENSE    |
| P8 | THADA    | c.5822C>T(p.S1941L) | MISSENSE    |
| P8 | SETD2    | c.1334G>A(p.R445H)  | MISSENSE    |
| P8 | ARID1A   | c.3419C>A(p.S1140Y) | MISSENSE    |
| P8 | ABCB1    | c.836A>C(p.K279T)   | MISSENSE    |
| P8 | ATM      | c.5584C>T(p.L1862F) | MISSENSE    |
| P8 | CHD4     | c.3659A>C(p.K1220T) | MISSENSE    |

|    |        |                       |             |
|----|--------|-----------------------|-------------|
| P8 | BRCA2  | c.7559G>A(p.R2520Q)   | MISSENSE    |
| P8 | PKHD1  | c.6084G>T(p.K2028N)   | MISSENSE    |
| P8 | HGF    | c.1915A>C(p.N639H)    | MISSENSE    |
| P8 | PDGFRB | c.2335G>A(p.V779I)    | MISSENSE    |
| P8 | CYP2D6 | c.262C>T(p.R88C)      | MISSENSE    |
| P8 | FH     | c.472_473delAGinsCA(f | MISSENSE    |
| P8 | ROS1   | c.3250A>C(p.I1084L)   | MISSENSE    |
| P8 | NTRK2  | c.1150A>C(p.I384L)    | MISSENSE    |
| P8 | RET    | c.1187C>T(p.S396L)    | MISSENSE    |
| P8 | APC    | c.5522A>T(p.D1841V)   | MISSENSE    |
| P8 | KITLG  | c.425G>T(p.R142I)     | MISSENSE    |
| P8 | PIK3CA | c.2236G>A(p.D746N)    | MISSENSE    |
| P8 | RPTOR  | c.333G>T(p.E111D)     | MISSENSE    |
| P8 | ATR    | c.760G>T(p.E254*)     | STOP GAINED |
| P8 | SF3B1  | c.756A>C(p.K252N)     | MISSENSE    |
| P8 | ALK    | c.3541C>T(p.R1181C)   | MISSENSE    |
| P8 | EPAS1  | c.2216G>A(p.R739Q)    | MISSENSE    |
| P8 | ERBB4  | c.2557T>G(p.S853A)    | MISSENSE    |
| P8 | TAP2   | c.1051G>T(p.E351*)    | STOP GAINED |
| P8 | AR     | c.878C>A(p.S293Y)     | MISSENSE    |
| P8 | FAT1   | c.2542G>T(p.D848Y)    | MISSENSE    |
| P8 | FGFR2  | c.2387C>A(p.S796Y)    | MISSENSE    |
| P8 | MLH3   | c.1666G>T(p.D556Y)    | MISSENSE    |
| P8 | ERBB4  | c.458A>C(p.K153T)     | MISSENSE    |
| P8 | CBLB   | c.2078C>A(p.S693Y)    | MISSENSE    |
| P8 | ROS1   | c.980G>T(p.G327V)     | MISSENSE    |
| P8 | ROS1   | c.1579G>T(p.E527*)    | STOP GAINED |
| P8 | TAP2   | c.405A>C(p.K135N)     | MISSENSE    |
| P8 | SETD2  | c.3700G>T(p.E1234*)   | STOP GAINED |
| P8 | BARD1  | c.1435T>G(p.L479V)    | MISSENSE    |
| P8 | FANCD2 | c.821G>T(p.R274I)     | MISSENSE    |
| P8 | SETD2  | c.4568G>A(p.R1523H)   | MISSENSE    |
| P8 | IFNG   | c.355A>T(p.T119S)     | MISSENSE    |
| P8 | CDA    | c.429G>T(p.Q143H)     | MISSENSE    |
| P8 | TGFBR2 | c.1208G>A(p.R403H)    | MISSENSE    |
| P8 | LYN    | c.998G>A(p.S333N)     | MISSENSE    |
| P8 | MAP2K4 | c.395G>T(p.R132I)     | MISSENSE    |
| P8 | LRP1B  | c.466C>A(p.Q156K)     | MISSENSE    |
| P8 | PREX2  | c.3898A>G(p.T1300A)   | MISSENSE    |
| P8 | GRIN2A | c.148G>A(p.E50K)      | MISSENSE    |
| P8 | FANCC  | c.1603C>T(p.R535C)    | MISSENSE    |
| P8 | SETD2  | c.2794G>A(p.V932I)    | MISSENSE    |
| P8 | WRN    | c.1519G>T(p.E507*)    | STOP GAINED |
| P8 | MAP3K1 | c.4165T>G(p.F1389V)   | MISSENSE    |
| P8 | ARID2  | c.1258G>A(p.E420K)    | MISSENSE    |
| P8 | APC    | c.503G>T(p.R168I)     | MISSENSE    |
| P8 | WAS    | c.93G>T(p.E31D)       | MISSENSE    |

|    |         |                        |             |
|----|---------|------------------------|-------------|
| P8 | XPC     | c.1536A>C(p.K512N)     | MISSENSE    |
| P8 | BRCA2   | c.2544G>T(p.K848N)     | MISSENSE    |
| P8 | CTNNB1  | c.664T>C(p.S222P)      | MISSENSE    |
| P8 | CASP8   | c.52G>T(p.D18Y)        | MISSENSE    |
| P8 | ATM     | c.8071C>T(p.R2691C)    | MISSENSE    |
| P8 | AKT1    | c.1003C>A(p.L335M)     | MISSENSE    |
| P8 | ATM     | c.6013C>A(p.L2005I)    | MISSENSE    |
| P8 | IL7R    | c.1151C>A(p.S384Y)     | MISSENSE    |
| P8 | SETD2   | c.2751T>G(p.S917R)     | MISSENSE    |
| P8 | FAT1    | c.3575A>C(p.K1192T)    | MISSENSE    |
| P8 | FANCC   | c.263A>C(p.K88T)       | MISSENSE    |
| P8 | MPL     | c.373C>A(p.L125I)      | MISSENSE    |
| P8 | EP300   | c.4219A>C(p.K1407Q)    | MISSENSE    |
| P8 | LRP1B   | c.1598G>T(p.G533V)     | MISSENSE    |
| P8 | PTPN11  | c.923A>C(p.N308T)      | MISSENSE    |
| P8 | MRE11A  | c.391G>A(p.D131N)      | MISSENSE    |
| P8 | ZNF217  | c.1731G>T(p.K577N)     | MISSENSE    |
| P8 | PRKCI   | c.114A>G(p.I38M)       | MISSENSE    |
| P8 | BRCA2   | c.2275C>A(p.L759I)     | MISSENSE    |
| P8 | TEK     | c.3022G>A(p.E1008K)    | MISSENSE    |
| P8 | ETV6    | c.849C>A(p.H283Q)      | MISSENSE    |
| P8 | DOT1L   | c.4064C>T(p.S1355L)    | MISSENSE    |
| P8 | XRCC2   | c.137T>G(p.F46C)       | MISSENSE    |
| P8 | TAP2    | c.223dupC(p.L75Pfs*92) | FRAMESHIFT  |
| P8 | APC     | c.4348C>T(p.R1450*)    | STOP GAINED |
| P8 | BRCA2   | c.4301A>C(p.K1434T)    | MISSENSE    |
| P8 | NSD1    | c.2378_2379insC(p.K79) | FRAMESHIFT  |
| P8 | BAI3    | c.544G>T(p.E182*)      | STOP GAINED |
| P8 | BLM     | c.79C>A(p.L27I)        | MISSENSE    |
| P8 | FANCI   | c.1315G>T(p.E439*)     | STOP GAINED |
| P8 | PTK2    | c.570G>T(p.K190N)      | MISSENSE    |
| P8 | PLK1    | c.912C>A(p.F304L)      | MISSENSE    |
| P8 | PDE11A  | c.1112C>T(p.S371F)     | MISSENSE    |
| P8 | LRP1B   | c.10912C>T(p.R3638W)   | MISSENSE    |
| P8 | CYLD    | c.372A>C(p.Q124H)      | MISSENSE    |
| P8 | PDGFRA  | c.2041G>T(p.D681Y)     | MISSENSE    |
| P8 | MAP2K4  | c.200G>T(p.G67V)       | MISSENSE    |
| P8 | ZNF217  | c.3089G>T(p.R1030I)    | MISSENSE    |
| P8 | CYSLTR2 | c.582A>C(p.K194N)      | MISSENSE    |
| P8 | MAP3K4  | c.665G>A(p.R222H)      | MISSENSE    |
| P8 | LRP1B   | c.6018G>T(p.E2006D)    | MISSENSE    |
| P8 | JAK1    | c.3416G>A(p.R1139Q)    | MISSENSE    |
| P8 | MTOR    | c.7513C>T(p.R2505*)    | STOP GAINED |
| P8 | CYSLTR2 | c.703G>T(p.E235*)      | STOP GAINED |
| P8 | PIK3R1  | c.1157G>A(p.R386Q)     | MISSENSE    |
| P8 | TUBB3   | c.891G>T(p.K297N)      | MISSENSE    |
| P8 | SETD2   | c.71+2T>C              | SPLICE      |

|    |         |                     |             |
|----|---------|---------------------|-------------|
| P8 | SF3B1   | c.944G>A(p.R315Q)   | MISSENSE    |
| P8 | CHEK2   | c.1369G>T(p.E457*)  | STOP GAINED |
| P8 | ROS1    | c.2293A>C(p.K765Q)  | MISSENSE    |
| P8 | ESR1    | c.1702T>G(p.L568V)  | MISSENSE    |
| P8 | ATRX    | c.3171G>T(p.K1057N) | MISSENSE    |
| P8 | NKX2-1  | c.821C>T(p.A274V)   | MISSENSE    |
| P8 | PREX2   | c.2894A>C(p.D965A)  | MISSENSE    |
| P8 | MLLT4   | c.131G>T(p.R44I)    | MISSENSE    |
| P8 | TAP1    | c.806G>A(p.G269D)   | MISSENSE    |
| P8 | PDGFRA  | c.2166T>G(p.I722M)  | MISSENSE    |
| P8 | NFE2L2  | c.1772T>C(p.V591A)  | MISSENSE    |
| P8 | PTPN13  | c.2767C>T(p.R923*)  | STOP GAINED |
| P8 | POT1    | c.587T>G(p.V196G)   | MISSENSE    |
| P8 | PDE11A  | c.1865C>T(p.A622V)  | MISSENSE    |
| P8 | IKBKE   | c.419A>G(p.N140S)   | MISSENSE    |
| P8 | HSPH1   | c.1180T>G(p.F394V)  | MISSENSE    |
| P8 | JAK2    | c.1244A>C(p.K415T)  | MISSENSE    |
| P8 | MSH2    | c.1738G>T(p.E580*)  | STOP GAINED |
| P8 | ATRX    | c.1911G>T(p.E637D)  | MISSENSE    |
| P8 | QKI     | c.451T>G(p.L151V)   | MISSENSE    |
| P8 | CTNNB1  | c.264G>T(p.M88I)    | MISSENSE    |
| P8 | FOXP1   | c.1573C>T(p.R525*)  | STOP GAINED |
| P8 | WAS     | c.122G>T(p.R41L)    | MISSENSE    |
| P8 | DTL     | c.544G>A(p.V182M)   | MISSENSE    |
| P8 | KMT2B   | c.3704G>A(p.R1235Q) | MISSENSE    |
| P8 | PRKAR1A | c.153G>T(p.R51S)    | MISSENSE    |
| P8 | ATRX    | c.3021A>C(p.Q1007H) | MISSENSE    |
| P8 | ATRX    | c.3392G>T(p.R1131I) | MISSENSE    |
| P8 | PGR     | c.1349C>A(p.S450Y)  | MISSENSE    |
| P8 | APC     | c.4154G>T(p.S1385I) | MISSENSE    |
| P8 | CDC73   | c.1450C>T(p.R484C)  | MISSENSE    |
| P8 | ATM     | c.6001T>G(p.L2001V) | MISSENSE    |
| P8 | WAS     | c.280C>T(p.R94W)    | MISSENSE    |
| P8 | NF1     | c.7720G>T(p.E2574*) | STOP GAINED |
| P8 | ATIC    | c.1136G>A(p.R379Q)  | MISSENSE    |
| P8 | IFNE    | c.95G>T(p.R32I)     | MISSENSE    |
| P8 | PDGFRA  | c.1425G>T(p.E475D)  | MISSENSE    |
| P8 | AMER1   | c.2570G>A(p.R857Q)  | MISSENSE    |
| P8 | BRIP1   | c.752G>A(p.R251H)   | MISSENSE    |
| P8 | NBN     | c.1589C>A(p.S530Y)  | MISSENSE    |
| P8 | FAT1    | c.3209G>A(p.R1070Q) | MISSENSE    |
| P8 | NF2     | c.300T>G(p.F100L)   | MISSENSE    |
| P8 | MUTYH   | c.1517T>C(p.M506T)  | MISSENSE    |
| P8 | PKHD1   | c.6388G>A(p.A2130T) | MISSENSE    |
| P8 | CHEK2   | c.1519G>T(p.A507S)  | MISSENSE    |

|     |         |                      |             |
|-----|---------|----------------------|-------------|
| P8  | AXL     | c.2425G>A(p.E809K)   | MISSENSE    |
| P8  | AR      | c.1472C>T(p.A491V)   | MISSENSE    |
| P8  | ABCB1   | c.2246G>A(p.R749Q)   | MISSENSE    |
| P8  | ERCC5   | c.2502T>G(p.Y834*)   | STOP GAINED |
| P8  | GRM8    | c.1502A>G(p.D501G)   | MISSENSE    |
| P8  | CTNNB1  | c.269G>A(p.R90Q)     | MISSENSE    |
| P8  | BTK     | c.1469G>A(p.R490H)   | MISSENSE    |
| P8  | FANCD2  | c.1092G>A(p.W364*)   | STOP GAINED |
| P8  | ERBB4   | c.2584T>G(p.F862V)   | MISSENSE    |
| P8  | NTRK1   | c.1237G>A(p.E413K)   | MISSENSE    |
| P8  | CYP2A6  | c.821G>A(p.R274H)    | MISSENSE    |
| P8  | SMAD2   | c.448G>A(p.E150K)    | MISSENSE    |
| P8  | TPMT    | c.487C>T(p.R163C)    | MISSENSE    |
| P8  | ERBB2IP | c.2455G>A(p.V819I)   | MISSENSE    |
| P8  | RAD50   | c.3880G>A(p.D1294N)  | MISSENSE    |
| P8  | ATM     | c.3980T>G(p.L1327*)  | STOP GAINED |
| P8  | RAD51C  | c.550G>A(p.A184T)    | MISSENSE    |
| P8  | FGFR3   | c.148G>A(p.V50I)     | MISSENSE    |
| P8  | FGFR1   | c.2461C>T(p.R821C)   | MISSENSE    |
| P8  | RAF1    | c.200G>T(p.R67I)     | MISSENSE    |
| P8  | PIK3CA  | c.3044C>A(p.S1015Y)  | MISSENSE    |
| P8  | BMPR1A  | c.531-1G>T           | SPLICE      |
| P8  | MSH2    | c.1289A>T(p.K430I)   | MISSENSE    |
| P8  | LRP1B   | c.9912C>A(p.F3304L)  | MISSENSE    |
| P8  | FAT1    | c.11180G>T(p.G3727V) | MISSENSE    |
| P8  | ATR     | c.2770A>C(p.S924R)   | MISSENSE    |
| P8  | MTOR    | c.4348T>G(p.Y1450D)  | MISSENSE    |
| P8  | BRCA1   | c.1024C>A(p.L342M)   | MISSENSE    |
| P8  | MAP3K1  | c.2759T>G(p.L920W)   | MISSENSE    |
| P8  | TGFBR2  | c.1234G>T(p.D412Y)   | MISSENSE    |
| P8  | DPYD    | c.964T>C(p.C322R)    | MISSENSE    |
| P8  | PKHD1   | c.527G>T(p.S176I)    | MISSENSE    |
| P8  | KMT2B   | c.7807G>T(p.E2603*)  | STOP GAINED |
| P8  | CRKL    | c.737G>A(p.R246K)    | MISSENSE    |
| P9  | FGFR4   | c.787G>T(p.V263L)    | MISSENSE    |
| P9  | ESR1    | c.988G>A(p.E330K)    | MISSENSE    |
| P9  | FBXW7   | c.7C>T(p.Q3*)        | STOP GAINED |
| P9  | LRP1B   | c.2095G>A(p.G699S)   | MISSENSE    |
| P10 | TUBB3   | c.1141A>T(p.I381F)   | MISSENSE    |
| P10 | IGF1R   | c.722C>T(p.A241V)    | MISSENSE    |
| P10 | ERCC4   | c.1444G>C(p.E482Q)   | MISSENSE    |
| P10 | KMT2B   | c.6661C>T(p.P2221S)  | MISSENSE    |
| P10 | PDGFRA  | c.248C>T(p.T83M)     | MISSENSE    |
| P10 | AXL     | c.1642C>G(p.Q548E)   | MISSENSE    |
| P10 | TP53    | c.499C>T(p.Q167*)    | STOP GAINED |
| P10 | ABCB1   | c.1350+2T>A          | SPLICE      |



|     |         |                        |                         |
|-----|---------|------------------------|-------------------------|
| P10 | FANCF   | c.187C>T(p.H63Y)       | MISSENSE                |
| P10 | BRAF    | c.1799T>A(p.V600E)     | MISSENSE                |
| P10 | IDH1    | c.719A>G(p.E240G)      | MISSENSE                |
| P10 | POLD1   | c.829C>G(p.L277V)      | MISSENSE                |
| P10 | FAT1    | c.12497_13138+1533del  | LARGE FRAGMENT DELETION |
| P10 | TUBB3   |                        | Amplification           |
| P10 | PKHD1   | c.1991G>A(p.W664*)     | STOP GAINED             |
| P10 | DENND1A | c.1426G>C(p.V476L)     | MISSENSE                |
| P10 | GRIN2A  | c.237delC(p.K80Rfs*30) | FRAMESHIFT              |
| P10 | EXT1    | c.652_962+12delinsCC   | SPLICE                  |
| P10 | CDKN1B  |                        | Deletion                |
| P10 | FLT3    |                        | Amplification           |
| P10 | PTPRD   |                        | Deletion                |
| P10 | MEN1    |                        | Deletion                |
| P11 | PRKCI   | c.1438C>T(p.R480C)     | MISSENSE                |
| P11 | APC     | c.1495C>T(p.R499*)     | STOP GAINED             |
| P11 | SMO     | c.430C>T(p.R144C)      | MISSENSE                |
| P11 | NQO1    | c.359T>A(p.V120E)      | MISSENSE                |
| P11 | KRAS    | c.35G>A(p.G12D)        | MISSENSE                |
| P11 | AMER1   | c.1183G>T(p.E395*)     | STOP GAINED             |
| P11 | PREX2   | c.39C>A(p.S13R)        | MISSENSE                |
| P11 | TP53    | c.532C>G(p.H178D)      | MISSENSE                |
| P12 | SMAD4   | c.956-7_965dupCCTAT    | FRAMESHIFT              |
| P12 | APC     | c.3904delC(p.L1302Cfs) | FRAMESHIFT              |
| P12 | SMARCA4 | c.1538G>A(p.R513Q)     | MISSENSE                |
| P12 | ERBB3   | c.1921C>G(p.H641D)     | MISSENSE                |
| P12 | TP53    | c.707A>G(p.Y236C)      | MISSENSE                |
| P13 | ERBB3   | c.310G>A(p.V104M)      | MISSENSE                |
| P13 | GNAS    | c.1163C>T(p.A388V)     | MISSENSE                |
| P13 | SETBP1  | c.3233C>T(p.T1078M)    | MISSENSE                |
| P14 | APC     | c.4616C>A(p.S1539*)    | STOP GAINED             |
| P14 | LHCGR   | c.459-1G>C             | SPLICE                  |
| P14 | TP53    | c.1024C>T(p.R342*)     | STOP GAINED             |
| P14 | TP53    | c.734G>T(p.G245V)      | MISSENSE                |
| P14 | NRG1    | c.1757G>T(p.R586I)     | MISSENSE                |
| P14 | SMAD4   | c.739G>T(p.G247*)      | STOP GAINED             |
| P14 | ATM     | c.829G>T(p.E277*)      | STOP GAINED             |
| P14 | SMAD4   |                        | Deletion                |
| P14 | DLL3    | c.133G>T(p.A45S)       | MISSENSE                |
| P14 | SMAD4   |                        | Deletion                |
| P14 | MEN1    |                        | Deletion                |
| P15 | TP53    | c.481G>A(p.A161T)      | MISSENSE                |
| P15 | MEN1    | c.1012C>G(p.L338V)     | MISSENSE                |
| P15 | APC     | c.637C>T(p.R213*)      | STOP GAINED             |
| P15 | LRP1B   | c.10057+1G>A           | SPLICE                  |
| P15 | ATM     | c.979G>A(p.G327R)      | MISSENSE                |
| P15 | APC     | c.4298delC(p.P1433Qfs) | FRAMESHIFT              |

|     |        |                        |               |
|-----|--------|------------------------|---------------|
| P15 | TP53   |                        | Deletion      |
| P15 | TP53   |                        | Deletion      |
| P15 | RECQL4 |                        | Amplification |
| P16 | MYC    |                        | Amplification |
| P16 | APC    | c.4351G>T(p.E1451*)    | STOP GAINED   |
| P16 | TP53   | c.817C>T(p.R273C)      | MISSENSE      |
| P16 | AMER1  | c.519dupT(p.S174*)     | FRAMESHIFT    |
| P16 | FLT4   | c.2287G>A(p.V763M)     | MISSENSE      |
| P16 | PPARD  | c.170A>G(p.Q57R)       | MISSENSE      |
| P16 | MYC    |                        | Amplification |
| P17 | ALK    | c.389G>A(p.G130D)      | MISSENSE      |
| P17 | KRAS   | c.351A>T(p.K117N)      | MISSENSE      |
| P17 | GRM3   | c.1114G>A(p.V372I)     | MISSENSE      |
| P17 | DOT1L  | c.1391C>A(p.P464H)     | MISSENSE      |
| P17 | FAT1   | c.1645C>G(p.R549G)     | MISSENSE      |
| P17 | TP53   | c.742C>T(p.R248W)      | MISSENSE      |
| P17 | KIT    | c.1415T>C(p.L472P)     | MISSENSE      |
| P17 | MRE11A | c.233T>C(p.L78S)       | MISSENSE      |
| P17 | GNAS   | c.601C>T(p.R201C)      | MISSENSE      |
| P17 | CYP2D6 | c.994G>A(p.E332K)      | MISSENSE      |
| P17 | ATRX   | c.5831G>A(p.S1944N)    | MISSENSE      |
| P17 | PRDM1  | c.236C>T(p.A79V)       | MISSENSE      |
| P17 | DPYD   | c.2906A>G(p.Q969R)     | MISSENSE      |
| P17 | KRAS   | c.182A>G(p.Q61R)       | MISSENSE      |
| P18 | TP53   |                        | Deletion      |
| P18 | MYC    |                        | Amplification |
| P18 | APC    | c.2863G>T(p.E955*)     | STOP GAINED   |
| P18 | RET    | c.2498G>A(p.R833H)     | MISSENSE      |
| P18 | IGF1R  |                        | Amplification |
| P18 | ZNF703 |                        | Amplification |
| P18 | APC    | c.4313delC(p.T1438Nfs) | FRAMESHIFT    |
| P18 | FBXW7  | c.1122+1G>C            | SPLICE        |
| P18 | TP53   | c.743G>A(p.R248Q)      | MISSENSE      |
| P18 | KRAS   | c.35G>A(p.G12D)        | MISSENSE      |
| P18 | TP53   |                        | Deletion      |
| P18 | IGF1R  |                        | Amplification |
| P18 | MYC    |                        | Amplification |
| P18 | ZNF703 |                        | Amplification |
| P18 | RECQL4 |                        | Amplification |
| P19 | APC    | c.3907C>T(p.Q1303*)    | STOP GAINED   |
| P19 | NFE2L2 | c.1346G>A(p.R449H)     | MISSENSE      |
| P19 | TP53   | c.637C>T(p.R213*)      | STOP GAINED   |
| P19 | GNAS   |                        | Amplification |
| P20 | BRCA2  | c.2649C>G(p.F883L)     | MISSENSE      |
| P20 | ZNF703 | c.698A>G(p.N233S)      | MISSENSE      |
| P20 | TP53   | c.721delT(p.S241Pfs*6) | FRAMESHIFT    |
| P20 | BLM    | c.1959G>T(p.K653N)     | MISSENSE      |

|     |        |                        |               |
|-----|--------|------------------------|---------------|
| P20 | CYP2A6 | c.1035C>A(p.D345E)     | MISSENSE      |
| P20 | LRP1B  | c.2380G>T(p.G794C)     | MISSENSE      |
| P20 | APC    | c.4031C>A(p.S1344*)    | STOP GAINED   |
| P21 | APC    | c.2938A>T(p.K980*)     | STOP GAINED   |
| P21 | TP53   | c.527G>T(p.C176F)      | MISSENSE      |
| P21 | ERBB3  | c.310G>A(p.V104M)      | MISSENSE      |
| P21 | APC    | c.4354delG(p.V1452Yfs) | FRAMESHIFT    |
| P21 | PBRM1  | c.862G>T(p.E288*)      | STOP GAINED   |
| P22 | PDCD1  | c.787G>A(p.A263T)      | MISSENSE      |
| P22 | SRC    |                        | Amplification |
| P22 | BMPR1A |                        | Deletion      |
| P22 | KEAP1  | c.274C>A(p.Q92K)       | MISSENSE      |
| P22 | KRAS   | c.35G>C(p.G12A)        | MISSENSE      |
| P22 | APC    | c.694C>T(p.R232*)      | STOP GAINED   |
| P22 | PTEN   |                        | Deletion      |
| P22 | SMAD4  |                        | Deletion      |
| P22 | APC    | c.2054G>A(p.W685*)     | STOP GAINED   |
| P22 | TOP1   |                        | Amplification |
| P22 | TP53   | c.524G>A(p.R175H)      | MISSENSE      |
| P22 | TP53   |                        | Deletion      |
| P22 | SRC    |                        | Amplification |
| P22 | TOP1   |                        | Amplification |
| P22 | SMAD4  |                        | Deletion      |
| P22 | BMPR1A |                        | Deletion      |
| P22 | PTEN   |                        | Deletion      |
| P22 | SMAD2  |                        | Deletion      |
| P22 | MAX    |                        | Deletion      |
| P22 | RAD51B |                        | Deletion      |
| P22 | SMAD3  |                        | Deletion      |
| P22 | PDK1   |                        | Amplification |
| P23 | TP53   | c.256_257delGC(p.A86)  | FRAMESHIFT    |
| P23 | MITF   | c.1019C>T(p.T340I)     | MISSENSE      |
| P23 | KRAS   | c.38G>A(p.G13D)        | MISSENSE      |
| P23 | ERCC5  | c.182G>A(p.R61Q)       | MISSENSE      |
| P23 | APC    | c.2397T>G(p.Y799*)     | STOP GAINED   |
| P24 | CDK8   | c.647-1G>T             | SPLICE        |
| P24 | APC    | c.1495C>T(p.R499*)     | STOP GAINED   |
| P24 | MLH1   |                        | Deletion      |
| P24 | SMAD4  |                        | Deletion      |
| P24 | LRP1B  | c.13610C>T(p.A4537V)   | MISSENSE      |
| P24 | APC    | c.4108A>T(p.K1370*)    | STOP GAINED   |
| P24 | TP53   | c.821T>C(p.V274A)      | MISSENSE      |
| P24 | TSC2   | c.3257G>T(p.G1086V)    | MISSENSE      |
| P24 | SMAD4  |                        | Deletion      |
| P24 | MLH1   |                        | Deletion      |
| P25 | BRAF   | c.1799T>A(p.V600E)     | MISSENSE      |
| P25 | TP53   | c.841G>C(p.D281H)      | MISSENSE      |

|     |        |                         |               |
|-----|--------|-------------------------|---------------|
| P25 | RNF43  | c.143T>A(p.I48N)        | MISSENSE      |
| P26 | TP53   | c.733G>A(p.G245S)       | MISSENSE      |
| P26 | GRIN2A | c.526_534dupATCTTCC     | INFRAME INDEL |
| P26 | PKHD1  | c.5134G>A(p.G1712R)     | MISSENSE      |
| P26 | APC    | c.4132C>T(p.Q1378*)     | STOP GAINED   |
| P26 | FBXW7  | c.1810A>T(p.K604*)      | STOP GAINED   |
| P26 | EPHA5  | c.1364G>A(p.R455Q)      | MISSENSE      |
| P27 | APC    | c.690_696dupTATACGA     | FRAMESHIFT    |
| P27 | PIK3CA | c.1633G>A(p.E545K)      | MISSENSE      |
| P27 | ARID2  | c.278dupA(p.Y93*)       | STOP GAINED   |
| P27 | NF1    | c.1431delT(p.F477Lfs*2) | FRAMESHIFT    |
| P27 | ARID2  | ARID2:exon15~IGR (do    | FUSION        |
| P27 | CREBBP | c.3307C>T(p.R1103*)     | STOP GAINED   |
| P27 | PRKDC  | c.7259C>T(p.S2420L)     | MISSENSE      |
| P27 | KMT2A  | c.5675A>G(p.Y1892C)     | MISSENSE      |
| P27 | NF1    | c.2033dupC(p.I679Dfs*2) | FRAMESHIFT    |
| P27 | ERBB3  | c.850G>A(p.G284R)       | MISSENSE      |
| P28 | KRAS   | c.35G>T(p.G12V)         | MISSENSE      |
| P28 | NTRK3  | c.1933C>T(p.R645C)      | MISSENSE      |
| P29 | PIK3CA | c.1633G>A(p.E545K)      | MISSENSE      |
| P29 | SMAD3  | c.277C>T(p.R93*)        | STOP GAINED   |
| P29 | KRAS   | c.34G>A(p.G12S)         | MISSENSE      |
| P29 | SMAD2  | c.388C>T(p.R130*)       | STOP GAINED   |
| P29 | CHD8   | c.3318A>T(p.E1106D)     | MISSENSE      |
| P29 | ARID2  | c.622G>A(p.G208R)       | MISSENSE      |
| P29 | APC    | c.4467_4471dupACATT     | FRAMESHIFT    |
| P30 | TP53   | c.461G>T(p.G154V)       | MISSENSE      |
| P30 | APC    | c.1495C>T(p.R499*)      | STOP GAINED   |
| P30 | JARID2 | c.2312G>A(p.R771H)      | MISSENSE      |
| P31 | IGF1R  | c.928G>A(p.G310S)       | MISSENSE      |
| P31 | SDHD   |                         | Deletion      |
| P31 | PKHD1  | c.1302A>T(p.E434D)      | MISSENSE      |
| P31 | AR     | c.2306T>A(p.L769Q)      | MISSENSE      |
| P31 | SMAD4  |                         | Deletion      |
| P31 | TP53   | c.638G>C(p.R213P)       | MISSENSE      |
| P31 | BRAF   | c.823G>A(p.E275K)       | MISSENSE      |
| P31 | SOX2   | c.859G>A(p.A287T)       | MISSENSE      |
| P31 | DOT1L  | c.2927C>T(p.A976V)      | MISSENSE      |
| P31 | APC    | c.2932C>T(p.Q978*)      | STOP GAINED   |
| P31 | HGF    | c.1048C>T(p.R350*)      | STOP GAINED   |
| P31 | KRAS   | c.436G>A(p.A146T)       | MISSENSE      |
| P31 | SMAD4  |                         | Deletion      |
| P31 | AXIN2  |                         | Deletion      |
| P31 | FBXW7  |                         | Deletion      |
| P32 | IL7R   |                         | Amplification |
| P32 | APC    | c.2821G>T(p.E941*)      | STOP GAINED   |
| P32 | PARK2  | c.1061G>A(p.G354E)      | MISSENSE      |

|     |        |                                    |               |
|-----|--------|------------------------------------|---------------|
| P32 | TOP1   |                                    | Amplification |
| P32 | SRC    |                                    | Amplification |
| P32 | APC    | c.1409-2A>G                        | SPLICE        |
| P32 | ZNF217 |                                    | Amplification |
| P32 | LRP1B  | c.5016A>C(p.E1672D)                | MISSENSE      |
| P32 | FAT1   | c.10353A>C(p.E3451D)               | MISSENSE      |
| P32 | ARID1B | c.59G>A(p.G20D)                    | MISSENSE      |
| P32 | CHEK1  | c.1115G>A(p.R372Q)                 | MISSENSE      |
| P32 | BAP1   | c.1289G>C(p.S430T)                 | MISSENSE      |
| P32 | TP53   | c.742C>T(p.R248W)                  | MISSENSE      |
| P32 | GNAS   |                                    | Amplification |
| P32 | EPHA5  | c.488G>T(p.G163V)                  | MISSENSE      |
| P32 | ATM    | c.1009C>T(p.R337C)                 | MISSENSE      |
| P33 | PKHD1  | c.1946C>T(p.T649M)                 | MISSENSE      |
| P33 | TSC2   | c.1459dupT(p.S487Ffs*              | FRAMESHIFT    |
| P33 | APC    | c.3944C>A(p.S1315*)                | STOP GAINED   |
| P33 | TP53   | c.814G>T(p.V272L)                  | MISSENSE      |
| P34 | TP53   | c.158G>A(p.W53*)                   | STOP GAINED   |
| P34 | FBXW7  | c.832C>T(p.R278*)                  | STOP GAINED   |
| P34 | APC    | c.4666dupA(p.T1556Nf               | FRAMESHIFT    |
| P34 | GATA4  | c.770C>T(p.P257L)                  | MISSENSE      |
| P34 | RECQL4 | c.654_655delACinsTT(p              | MISSENSE      |
| P34 | PDGFRB | c.1998C>A(p.N666K)                 | MISSENSE      |
| P34 | MAP3K1 | c.2512T>A(p.L838I)                 | MISSENSE      |
| P34 | KRAS   | c.38G>A(p.G13D)                    | MISSENSE      |
| P34 | PGR    | PGR:exon4~IGR (downs               | FUSION        |
| P35 | MITF   | c.124G>A(p.G42R)                   | MISSENSE      |
| P35 | MED12  | c.514G>A(p.E172K)                  | MISSENSE      |
| P35 | SOX2   | c.419C>T(p.A140V)                  | MISSENSE      |
| P35 | KRAS   | c.35G>T(p.G12V)                    | MISSENSE      |
| P35 | GNAS   |                                    | Amplification |
| P35 | GATA3  | c.619G>A(p.A207T)                  | MISSENSE      |
| P35 | TP53   | c.733G>A(p.G245S)                  | MISSENSE      |
| P35 | APC    | c.3904delC(p.L1302Cfs <sup>3</sup> | FRAMESHIFT    |
| P35 | FLCN   | c.1285dupC(p.H429Pfs <sup>1</sup>  | FRAMESHIFT    |
| P35 | GNAS   |                                    | Amplification |
| P36 | ERBB2  | c.2524G>A(p.V842I)                 | MISSENSE      |
| P36 | SMAD3  | c.1102C>T(p.R368*)                 | STOP GAINED   |
| P36 | TERT   | c.1358G>A(p.R453H)                 | MISSENSE      |
| P36 | APC    | c.4473delT(p.F1491Lfs*             | FRAMESHIFT    |
| P36 | LRP1B  | c.2962G>A(p.D988N)                 | MISSENSE      |
| P36 | KRAS   | c.35G>A(p.G12D)                    | MISSENSE      |
| P36 | TP53   | c.578A>T(p.H193L)                  | MISSENSE      |
| P36 | ARID1A | c.2720C>G(p.S907C)                 | MISSENSE      |
| P36 | CTNNB1 | c.832G>A(p.G278R)                  | MISSENSE      |
| P36 | CHEK2  | c.283C>T(p.R95*)                   | STOP GAINED   |
| P37 | TP53   | c.743G>A(p.R248Q)                  | MISSENSE      |

|     |         |                       |               |
|-----|---------|-----------------------|---------------|
| P37 | APC     | c.4312delA(p.T1438Hfs | FRAMESHIFT    |
| P37 | KRAS    | c.35G>A(p.G12D)       | MISSENSE      |
| P37 | APC     | c.3502G>T(p.E1168*)   | STOP GAINED   |
| P37 | RET     | c.2906G>A(p.R969Q)    | MISSENSE      |
| P38 | B2M     | c.106G>T(p.E36*)      | STOP GAINED   |
| P38 | CHD4    | c.5720A>G(p.Q1907R)   | MISSENSE      |
| P38 | JARID2  | c.1186dupG(p.A396Gfs  | FRAMESHIFT    |
| P38 | IGF1R   | c.95-2A>G             | SPLICE        |
| P38 | EPHA3   | c.649C>T(p.P217S)     | MISSENSE      |
| P38 | IGF1R   | c.3769C>T(p.P1257S)   | MISSENSE      |
| P38 | KMT2D   | c.4168delG(p.A1390Qfs | FRAMESHIFT    |
| P38 | TERT    | c.3032G>T(p.R1011M)   | MISSENSE      |
| P38 | THADA   | c.2993G>A(p.R998Q)    | MISSENSE      |
| P38 | IDH1    | c.664C>T(p.R222C)     | MISSENSE      |
| P38 | NBN     | c.1396delA(p.R466Gfs* | FRAMESHIFT    |
| P38 | ARID1A  | c.5548dupG(p.D1850Gf  | FRAMESHIFT    |
| P38 | TGFBR2  | c.382_383delAA(p.K12f | FRAMESHIFT    |
| P38 | BTK     | c.843G>A(p.W281*)     | STOP GAINED   |
| P38 | B2M     | c.68-2A>G             | SPLICE        |
| P38 | POLD1   | c.644C>T(p.A215V)     | MISSENSE      |
| P38 | MED12   | c.4070G>A(p.R1357H)   | MISSENSE      |
| P38 | PRSS1   | c.93G>T(p.E31D)       | MISSENSE      |
| P38 | PTCH1   | c.474G>A(p.M158I)     | MISSENSE      |
| P38 | FANCC   | c.554G>A(p.R185Q)     | MISSENSE      |
| P38 | SMARCA4 | c.326delC(p.P109Rfs*1 | FRAMESHIFT    |
| P38 | EPHA3   | c.369C>A(p.Y123*)     | STOP GAINED   |
| P38 | KMT2A   | c.5665C>T(p.R1889C)   | MISSENSE      |
| P38 | AKT1    | c.652C>A(p.Q218K)     | MISSENSE      |
| P38 | PAK3    | c.413T>C(p.M138T)     | MISSENSE      |
| P38 | EPHA2   | c.1952G>A(p.G651D)    | MISSENSE      |
| P38 | PIK3CA  | c.3140A>G(p.H1047R)   | MISSENSE      |
| P38 | TSHR    | c.290_292delTCT(p.F97 | INFRAME INDEL |
| P38 | RUNX1T1 | c.1069C>T(p.R357W)    | MISSENSE      |
| P38 | TP53    | c.524G>A(p.R175H)     | MISSENSE      |
| P38 | MECOM   | c.1839delA(p.G614Efs* | FRAMESHIFT    |
| P38 | RNF43   | c.2136_2143delAGAAA   | FRAMESHIFT    |
| P38 | BRCA2   | c.6539dupT(p.L2180Ffs | FRAMESHIFT    |
| P38 | DNMT3A  | c.2311C>T(p.R771*)    | STOP GAINED   |
| P38 | CHD8    | c.7543G>T(p.G2515C)   | MISSENSE      |
| P38 | TERT    | c.1453C>T(p.R485C)    | MISSENSE      |
| P38 | PLCB4   | c.1536delC(p.E513Nfs* | FRAMESHIFT    |
| P38 | RAD50   | c.2164_2165delAA(p.K  | FRAMESHIFT    |
| P38 | APC     | c.1660C>T(p.R554*)    | STOP GAINED   |
| P38 | GRIN2A  | c.1310G>A(p.R437Q)    | MISSENSE      |
| P38 | FLT4    | c.491G>A(p.G164D)     | MISSENSE      |
| P38 | MEN1    | c.1310C>T(p.A437V)    | MISSENSE      |
| P38 | TSC1    | c.3127_3129dupAGC(p   | INFRAME INDEL |

|     |        |                        |               |
|-----|--------|------------------------|---------------|
| P38 | ARAF   | c.23delC(p.P8Lfs*26)   | FRAMESHIFT    |
| P38 | BAX    | c.265delC(p.R89Efs*44) | FRAMESHIFT    |
| P38 | TTF1   | c.821delA(p.K274Sfs*1) | FRAMESHIFT    |
| P38 | BAX    | c.121delG(p.E41Rfs*19) | FRAMESHIFT    |
| P38 | BUB1B  | c.2996G>A(p.R999Q)     | MISSENSE      |
| P38 | PBRM1  | c.1605G>T(p.E535D)     | MISSENSE      |
| P38 | NRAS   | c.34G>T(p.G12C)        | MISSENSE      |
| P38 | GRIN2A | c.391G>A(p.A131T)      | MISSENSE      |
| P38 | KMT2B  | c.5159T>C(p.L1720S)    | MISSENSE      |
| P38 | PIK3R1 | c.907C>T(p.P303S)      | MISSENSE      |
| P38 | THADA  | c.483T>A(p.N161K)      | MISSENSE      |
| P38 | GATA6  | c.996_998dupCCA(p.H3   | INFRAME INDEL |
| P38 | APC    | c.3709_3710delCA(p.Q   | FRAMESHIFT    |
| P38 | KMT2B  | c.6895delC(p.R2299Gfs  | FRAMESHIFT    |
| P38 | ERCC4  | c.1024delA(p.R342Gfs*  | FRAMESHIFT    |
| P38 | NBN    | c.2232delT(p.F744Lfs*7 | FRAMESHIFT    |
| P38 | APC    | c.1742delA(p.K581Rfs*  | FRAMESHIFT    |
| P38 | TP53   | c.1085G>A(p.S362N)     | MISSENSE      |
| P38 | RAF1   | c.779C>T(p.T260I)      | MISSENSE      |
| P38 | TOP2A  | c.4303delA(p.R1435Gfs  | FRAMESHIFT    |
| P38 | SLC3A2 | c.899delA(p.K300Rfs*3  | FRAMESHIFT    |
| P38 | EPAS1  | c.2542G>A(p.V848M)     | MISSENSE      |
| P38 | POLD1  | c.1922C>A(p.P641H)     | MISSENSE      |
| P38 | PIK3R1 | c.1344delA(p.K448Nfs*  | FRAMESHIFT    |
| P38 | SOS1   | c.1705C>A(p.L569M)     | MISSENSE      |
| P38 | ARID2  | c.1767T>A(p.N589K)     | MISSENSE      |
| P38 | RET    | c.2161C>T(p.R721W)     | MISSENSE      |
| P38 | PALLD  | c.2756A>G(p.D919G)     | MISSENSE      |
| P38 | PTCH1  | c.3606delC(p.S1203Afs  | FRAMESHIFT    |
| P38 | KMT2B  | c.7795delG(p.E2599Rfs  | FRAMESHIFT    |
| P38 | PRDM1  | c.1571C>T(p.T524M)     | MISSENSE      |
| P38 | RECQL4 | c.645G>T(p.E215D)      | MISSENSE      |
| P38 | GSTT1  | c.566C>T(p.P189L)      | MISSENSE      |
| P38 | SMAD2  | c.524delT(p.L175Cfs*5) | FRAMESHIFT    |
| P38 | MSH6   | c.3261dupC(p.F1088Lfs  | FRAMESHIFT    |
| P38 | PREX2  | c.2715+1G>A            | SPLICE        |
| P38 | TP53   | c.733G>A(p.G245S)      | MISSENSE      |
| P38 | DNMT3A | c.81G>T(p.E27D)        | MISSENSE      |
| P38 | DDR2   | c.2507C>T(p.T836M)     | MISSENSE      |
| P38 | QKI    | c.401delA(p.K134Rfs*1  | FRAMESHIFT    |
| P38 | SOCS1  | c.150delC(p.G51Afs*34  | FRAMESHIFT    |
| P38 | NSD1   | c.4151G>T(p.R1384L)    | MISSENSE      |
| P38 | CHD8   | c.3478C>T(p.R1160C)    | MISSENSE      |
| P38 | RNF43  | c.1976delG(p.G659Vfs*  | FRAMESHIFT    |
| P39 | TP53   | c.733G>A(p.G245S)      | MISSENSE      |
| P39 | APC    | c.4099C>T(p.Q1367*)    | STOP GAINED   |
| P40 | LHCGR  | c.1613C>T(p.A538V)     | MISSENSE      |

|     |         |                        |               |
|-----|---------|------------------------|---------------|
| P40 | BTG2    | c.403C>A(p.L135I)      | MISSENSE      |
| P40 | TUBB3   | c.772G>A(p.V258M)      | MISSENSE      |
| P40 | CHD8    | c.2827C>T(p.R943C)     | MISSENSE      |
| P40 | CTNNB1  | c.673C>T(p.R225C)      | MISSENSE      |
| P40 | RECQL4  | c.2637delC(p.S880Qfs*  | FRAMESHIFT    |
| P40 | FBXW7   | c.1810A>G(p.K604E)     | MISSENSE      |
| P40 | GNAS    | c.1792C>T(p.R598C)     | MISSENSE      |
| P40 | CREBBP  | c.3631_3632delTT(p.L1  | FRAMESHIFT    |
| P40 | CBL     | c.1852C>T(p.H618Y)     | MISSENSE      |
| P40 | EP300   | c.1992G>T(p.M664I)     | MISSENSE      |
| P40 | NOTCH2  | c.1862G>A(p.R621H)     | MISSENSE      |
| P40 | TNFAIP3 | c.2274delC(p.K759Sfs*! | FRAMESHIFT    |
| P40 | STK11   | c.644G>A(p.G215D)      | MISSENSE      |
| P40 | FGF19   | c.313G>A(p.A105T)      | MISSENSE      |
| P40 | BAP1    | c.1850G>T(p.R617M)     | MISSENSE      |
| P40 | NOTCH1  | c.7475C>T(p.S2492L)    | MISSENSE      |
| P40 | SUFU    | c.71delC(p.P24Rfs*72)  | FRAMESHIFT    |
| P40 | RPTOR   | c.3439G>A(p.V1147I)    | MISSENSE      |
| P40 | GNAS    | c.1066C>T(p.R356C)     | MISSENSE      |
| P40 | SDHB    | c.427T>G(p.L143V)      | MISSENSE      |
| P40 | IRF2    | c.893C>A(p.P298Q)      | MISSENSE      |
| P40 | GATA6   | c.572C>A(p.T191N)      | MISSENSE      |
| P40 | PPARD   | c.856G>A(p.V286M)      | MISSENSE      |
| P40 | FOXA1   | c.1034delG(p.G345Afs*  | FRAMESHIFT    |
| P40 | MET     | c.1235G>A(p.R412H)     | MISSENSE      |
| P40 | JARID2  | c.1272delG(p.R425Gfs*  | FRAMESHIFT    |
| P40 | SETD2   | c.4219delA(p.R1407Gfs  | FRAMESHIFT    |
| P40 | BRCA2   | c.1813dupA(p.I605Nfs*  | FRAMESHIFT    |
| P40 | STAT3   | c.1013T>C(p.V338A)     | MISSENSE      |
| P40 | JAK1    | c.1594C>T(p.R532C)     | MISSENSE      |
| P40 | JAK1    | c.1289delC(p.P430Rfs*! | FRAMESHIFT    |
| P40 | FAT1    | c.8799delA(p.G2934Vfs  | FRAMESHIFT    |
| P40 | PDCD1   | c.105dupC(p.T36Hfs*7C  | FRAMESHIFT    |
| P40 | KDM5A   | c.3649C>T(p.R1217W)    | MISSENSE      |
| P40 | TOP2A   | c.3304G>A(p.E1102K)    | MISSENSE      |
| P40 | FGFR4   | c.1944+2T>C            | SPLICE        |
| P40 | UGT1A1  | c.1558A>G(p.K520E)     | MISSENSE      |
| P40 | TNFAIP3 | c.1805C>T(p.T602M)     | MISSENSE      |
| P40 | FGFR3   | c.1637C>T(p.T546M)     | MISSENSE      |
| P40 | MCL1    | c.328_330delGAG(p.E1   | INFRAME INDEL |
| P40 | BAX     | c.121delG(p.E41Rfs*19  | FRAMESHIFT    |
| P40 | APC     | c.2369_2370delGA(p.R   | FRAMESHIFT    |
| P40 | PGR     | c.1699dupT(p.C567Lfs*  | FRAMESHIFT    |
| P40 | APC     | c.694C>T(p.R232*)      | STOP GAINED   |
| P40 | NOTCH2  | c.3461C>T(p.A1154V)    | MISSENSE      |
| P40 | NBN     | c.1066G>A(p.A356T)     | MISSENSE      |
| P40 | ROS1    | c.1165G>A(p.V389I)     | MISSENSE      |



|     |         |                          |               |
|-----|---------|--------------------------|---------------|
| P40 | KRAS    | c.38G>A(p.G13D)          | MISSENSE      |
| P40 | RAD54L  | c.1718G>A(p.S573N)       | MISSENSE      |
| P40 | DENND1A | c.2783G>A(p.R928H)       | MISSENSE      |
| P40 | FANCF   | c.265T>C(p.C89R)         | MISSENSE      |
| P40 | PIK3CA  | c.2189T>C(p.V730A)       | MISSENSE      |
| P40 | TGFBR2  | c.382_383delAA(p.K128)   | FRAMESHIFT    |
| P40 | FGFR3   | c.1931A>G(p.N644S)       | MISSENSE      |
| P40 | MLH3    | c.1755dupA(p.E586Rfs*1)  | FRAMESHIFT    |
| P40 | SKP2    | c.686dupA(p.N229Kfs*1)   | FRAMESHIFT    |
| P40 | ARID1A  | c.827delG(p.G276Efs*8)   | FRAMESHIFT    |
| P40 | CBL     | c.2389A>G(p.S797G)       | MISSENSE      |
| P40 | FAT1    | c.223G>A(p.V75I)         | MISSENSE      |
| P40 | GATA6   | c.767C>T(p.A256V)        | MISSENSE      |
| P41 | TTF1    | c.821dupA(p.S275Vfs*2)   | FRAMESHIFT    |
| P41 | PDE11A  | c.1865C>T(p.A622V)       | MISSENSE      |
| P41 | ARID1A  | c.488C>T(p.A163V)        | MISSENSE      |
| P41 | FANCM   | c.4005delA(p.V1336Lfs*1) | FRAMESHIFT    |
| P41 | PTCH1   | c.3921delC(p.R1308Efs*1) | FRAMESHIFT    |
| P41 | KDM5A   | c.3597delA(p.G1200Dfs)   | FRAMESHIFT    |
| P41 | DICER1  | c.5186C>T(p.P1729L)      | MISSENSE      |
| P41 | RAD50   | c.1504delA(p.M502Wfs)    | FRAMESHIFT    |
| P41 | LRP1B   | c.5584A>G(p.T1862A)      | MISSENSE      |
| P41 | DNMT3A  | c.1742G>T(p.W581L)       | MISSENSE      |
| P41 | THADA   | c.3411G>C(p.Q1137H)      | MISSENSE      |
| P41 | MAP3K4  | c.925G>A(p.A309T)        | MISSENSE      |
| P41 | TGFBR2  | c.382_383delAA(p.K128)   | FRAMESHIFT    |
| P41 | MSH2    | c.746delA(p.K249Rfs*5)   | FRAMESHIFT    |
| P41 | BRCA2   | c.7791delA(p.E2598Kfs*1) | FRAMESHIFT    |
| P41 | B2M     | c.41_44delCTCT(p.S14F)   | FRAMESHIFT    |
| P41 | FAT1    | c.2T>C(p.M1?)            | START LOST    |
| P41 | EPHA5   | c.466T>G(p.F156V)        | MISSENSE      |
| P41 | CREBBP  | c.6745C>T(p.R2249C)      | MISSENSE      |
| P41 | DICER1  | c.2810G>A(p.R937H)       | MISSENSE      |
| P41 | HGF     | c.1999G>T(p.G667*)       | STOP GAINED   |
| P41 | MAP3K1  | c.2269C>T(p.R757C)       | MISSENSE      |
| P41 | HGF     | c.800C>T(p.P267L)        | MISSENSE      |
| P41 | NOTCH1  | c.2558_2560delTCT(p.F)   | INFRAME INDEL |
| P41 | PMS2    | c.1239delA(p.D414Tfs*)   | FRAMESHIFT    |
| P41 | BRD4    | c.118G>A(p.A40T)         | MISSENSE      |
| P41 | APC     | c.637C>T(p.R213*)        | STOP GAINED   |
| P41 | ERCC5   | c.2964+1G>A              | SPLICE        |
| P41 | INPP4B  | c.2621G>A(p.R874Q)       | MISSENSE      |
| P41 | ATR     | c.4456A>G(p.N1486D)      | MISSENSE      |
| P41 | TP53    | c.817C>T(p.R273C)        | MISSENSE      |
| P41 | CUX1    | c.2705G>A(p.R902H)       | MISSENSE      |
| P41 | RRM1    | c.1985G>A(p.C662Y)       | MISSENSE      |
| P41 | B2M     | c.43_44delCT(p.L15Ffs*)  | FRAMESHIFT    |

|     |        |                       |               |
|-----|--------|-----------------------|---------------|
| P41 | JARID2 | c.1272delG(p.R425Gfs* | FRAMESHIFT    |
| P41 | APC    | c.4396G>T(p.G1466*)   | STOP GAINED   |
| P41 | CHD4   | c.223-1G>A            | SPLICE        |
| P41 | ERBB4  | c.215G>A(p.R72Q)      | MISSENSE      |
| P41 | RRM1   | c.2052G>T(p.W684C)    | MISSENSE      |
| P41 | ARID1A | c.3281dupA(p.Q1095A)  | FRAMESHIFT    |
| P41 | RB1    | c.219_220dupAG(p.A74  | FRAMESHIFT    |
| P41 | TET2   | c.1106G>A(p.R369Q)    | MISSENSE      |
| P41 | CDC73  | c.1537C>T(p.R513W)    | MISSENSE      |
| P41 | MLH1   | c.839A>G(p.Y280C)     | MISSENSE      |
| P41 | EP300  | c.6490delC(p.Q2164Rfs | FRAMESHIFT    |
| P41 | BAX    | c.121delG(p.E41Rfs*19 | FRAMESHIFT    |
| P41 | CTCF   | c.610dupA(p.T204Nfs*; | FRAMESHIFT    |
| P41 | SLC3A2 | c.899delA(p.K300Rfs*3 | FRAMESHIFT    |
| P41 | KRAS   | c.38G>A(p.G13D)       | MISSENSE      |
| P41 | FANCI  | c.2565A>G(p.I855M)    | MISSENSE      |
| P41 | FLCN   | c.1285delC(p.H429Tfs* | FRAMESHIFT    |
| P41 | KMT2B  | c.3159delG(p.R1055Gfs | FRAMESHIFT    |
| P41 | AXIN2  | c.1994delG(p.G665Afs* | FRAMESHIFT    |
| P42 | KRAS   |                       | Amplification |
| P42 | BMPR1A |                       | Deletion      |
| P42 | ZNF703 |                       | Amplification |
| P42 | KRAS   | c.436G>A(p.A146T)     | MISSENSE      |
| P42 | PTEN   |                       | Deletion      |
| P42 | PLK1   | c.878G>A(p.R293H)     | MISSENSE      |
| P42 | APC    | c.3916G>T(p.E1306*)   | STOP GAINED   |
| P42 | FGFR1  |                       | Amplification |
| P42 | RB1    | c.1253G>C(p.R418T)    | MISSENSE      |
| P42 | MYC    |                       | Amplification |
| P42 | PTK2   |                       | Amplification |
| P42 | CSF1R  | c.2881C>T(p.Q961*)    | STOP GAINED   |
| P42 | NSD1   | c.1894C>T(p.R632*)    | STOP GAINED   |
| P42 | TP53   | c.1024C>T(p.R342*)    | STOP GAINED   |
| P42 | MET    | c.3856G>T(p.D1286Y)   | MISSENSE      |
| P42 | WRN    | c.2569C>T(p.R857C)    | MISSENSE      |
| P42 | DICER1 | c.2930A>G(p.N977S)    | MISSENSE      |
| P42 | KMT2B  | c.7907_7908delTT(p.F2 | FRAMESHIFT    |
| P42 | FGFR1  |                       | Amplification |
| P42 | KRAS   |                       | Amplification |
| P42 | ZNF703 |                       | Amplification |
| P42 | PTK2   |                       | Amplification |
| P42 | MYC    |                       | Amplification |
| P42 | PTEN   |                       | Deletion      |
| P42 | BMPR1A |                       | Deletion      |
| P42 | RECQL4 |                       | Amplification |
| P42 | SMAD2  |                       | Deletion      |
| P43 | APC    | c.2589C>A(p.Y863*)    | STOP GAINED   |

|     |         |                      |             |
|-----|---------|----------------------|-------------|
| P43 | ARID1A  | c.529C>T(p.Q177*)    | STOP GAINED |
| P43 | PALLD   | c.3214C>T(p.Q1072*)  | STOP GAINED |
| P43 | KRAS    | c.35G>A(p.G12D)      | MISSENSE    |
| P44 | FANCM   | c.5135C>A(p.S1712Y)  | MISSENSE    |
| P44 | ERBB3   | c.179T>A(p.M60K)     | MISSENSE    |
| P44 | ERBB3   | c.2029A>G(p.M677V)   | MISSENSE    |
| P44 | NOTCH1  | c.1066T>A(p.S356T)   | MISSENSE    |
| P44 | FANCI   | c.428A>G(p.N143S)    | MISSENSE    |
| P44 | BRAF    | c.712-2delA          | SPLICE      |
| P44 | POT1    | c.559A>C(p.T187P)    | MISSENSE    |
| P44 | CDK12   | c.754C>T(p.R252*)    | STOP GAINED |
| P44 | PDE11A  | c.1238G>A(p.R413Q)   | MISSENSE    |
| P44 | SMARCA4 | c.4270C>T(p.P1424S)  | MISSENSE    |
| P44 | CHEK2   | c.1283C>G(p.S428C)   | MISSENSE    |
| P45 | AXIN2   | c.32dupC(p.D12Gfs*8) | FRAMESHIFT  |
| P45 | TTF1    | c.269G>A(p.R90K)     | MISSENSE    |
| P45 | APC     | c.637C>T(p.R213*)    | STOP GAINED |
| P45 | TP53    | c.818G>A(p.R273H)    | MISSENSE    |
| P45 | CDKN1B  |                      | Deletion    |
| P46 | ALK     | c.4198G>T(p.E1400*)  | STOP GAINED |
| P46 | MSH6    | c.3964G>T(p.E1322*)  | STOP GAINED |
| P46 | APC     | c.854A>G(p.D285G)    | MISSENSE    |
| P46 | PTPN13  | c.1570A>C(p.I524L)   | MISSENSE    |
| P46 | ZNF217  | c.227A>G(p.H76R)     | MISSENSE    |
| P46 | EPHA5   | c.1345G>A(p.D449N)   | MISSENSE    |
| P46 | STAT3   | c.1875G>T(p.E625D)   | MISSENSE    |
| P46 | NPM1    | c.859C>A(p.L287I)    | MISSENSE    |
| P46 | KRAS    | c.292G>T(p.E98*)     | STOP GAINED |
| P46 | TTF1    | c.2344G>T(p.E782*)   | STOP GAINED |
| P46 | FAT1    | c.241A>C(p.N81H)     | MISSENSE    |
| P46 | PREX2   | c.2629A>C(p.I877L)   | MISSENSE    |
| P46 | BUB1B   | c.1246C>T(p.R416W)   | MISSENSE    |
| P46 | CYP2A6  | c.241C>G(p.L81V)     | MISSENSE    |
| P46 | FLT1    | c.2306C>T(p.A769V)   | MISSENSE    |
| P46 | KRAS    | c.436G>A(p.A146T)    | MISSENSE    |
| P46 | RICTOR  | c.839G>A(p.R280Q)    | MISSENSE    |
| P46 | PRKDC   | c.7060A>C(p.I2354L)  | MISSENSE    |
| P46 | GATA1   | c.182C>A(p.A61D)     | MISSENSE    |
| P46 | SPRED1  | c.470T>C(p.F157S)    | MISSENSE    |
| P46 | QKI     | c.10G>A(p.E4K)       | MISSENSE    |
| P46 | BRAF    | c.1165C>T(p.R389C)   | MISSENSE    |
| P46 | LRP1B   | c.3514C>A(p.L1172I)  | MISSENSE    |
| P46 | SMAD4   | c.919G>T(p.E307*)    | STOP GAINED |
| P46 | FAT1    | c.4516C>T(p.R1506C)  | MISSENSE    |
| P46 | SMAD4   | c.1487G>A(p.R496H)   | MISSENSE    |
| P46 | ERBB4   | c.283C>T(p.R95C)     | MISSENSE    |
| P46 | CHD8    | c.3207C>A(p.F1069L)  | MISSENSE    |

|     |           |                     |             |
|-----|-----------|---------------------|-------------|
| P46 | PDGFRA    | c.452G>A(p.R151H)   | MISSENSE    |
| P46 | B2M       | c.119C>A(p.S40*)    | STOP GAINED |
| P46 | SGK1      | c.275C>A(p.S92Y)    | MISSENSE    |
| P46 | CYSLTR2   | c.944G>A(p.R315K)   | MISSENSE    |
| P46 | PIK3CA    | c.3129G>T(p.M1043I) | MISSENSE    |
| P46 | LHCGR     | c.1078G>T(p.D360Y)  | MISSENSE    |
| P46 | SMAD2     | c.919A>C(p.N307H)   | MISSENSE    |
| P46 | TTF1      | c.1043C>T(p.A348V)  | MISSENSE    |
| P46 | CTNNB1    | c.2129G>A(p.R710H)  | MISSENSE    |
| P46 | PIK3R1    | c.1042C>T(p.R348*)  | STOP GAINED |
| P46 | STMN1     | c.88G>T(p.E30*)     | STOP GAINED |
| P46 | APC       | c.4348C>T(p.R1450*) | STOP GAINED |
| P46 | LRP1B     | c.805G>T(p.G269*)   | STOP GAINED |
| P46 | AMER1     | c.2815G>T(p.E939*)  | STOP GAINED |
| P46 | CDC73     | c.1450C>T(p.R484C)  | MISSENSE    |
| P46 | PDGFRA    | c.2097G>T(p.E699D)  | MISSENSE    |
| P46 | FANCM     | c.5797C>A(p.L1933I) | MISSENSE    |
| P46 | FANCL     | c.203G>A(p.R68Q)    | MISSENSE    |
| P46 | ARID2     | c.977C>A(p.S326Y)   | MISSENSE    |
| P46 | MAP2K1    | c.199G>A(p.D67N)    | MISSENSE    |
| P46 | GNAS      | c.409G>T(p.A137S)   | MISSENSE    |
| P46 | MITF      | c.952G>T(p.E318*)   | STOP GAINED |
| P46 | PIK3R1    | c.1381C>T(p.R461*)  | STOP GAINED |
| P46 | RELN      | c.4864C>T(p.R1622*) | STOP GAINED |
| P46 | CHD8      | c.4744C>T(p.R1582*) | STOP GAINED |
| P46 | ATRX      | c.3155A>C(p.K1052T) | MISSENSE    |
| P46 | FAT1      | c.7513G>A(p.A2505T) | MISSENSE    |
| P46 | PREX2     | c.311A>C(p.E104A)   | MISSENSE    |
| P46 | MAP2K4    | c.968G>A(p.G323E)   | MISSENSE    |
| P46 | PIK3R1    | c.1892G>A(p.R631Q)  | MISSENSE    |
| P46 | ATR       | c.446T>C(p.L149S)   | MISSENSE    |
| P46 | EZH2      | c.144A>C(p.K48N)    | MISSENSE    |
| P46 | NF1       | c.5588G>T(p.G1863V) | MISSENSE    |
| P46 | AR        | c.2428G>T(p.A810S)  | MISSENSE    |
| P46 | ROS1      | c.892A>C(p.K298Q)   | MISSENSE    |
| P46 | GRIN2A    | c.3217G>T(p.E1073*) | STOP GAINED |
| P46 | KDM5A     | c.4672G>T(p.E1558*) | STOP GAINED |
| P46 | PTK2      | c.2652G>T(p.K884N)  | MISSENSE    |
| P46 | ARID1A    | c.4646G>A(p.G1549D) | MISSENSE    |
| P46 | FBXW7     | c.103C>T(p.R35C)    | MISSENSE    |
| P46 | PDE11A    | c.4G>A(p.A2T)       | MISSENSE    |
| P46 | TNFRSF11A | c.983C>A(p.S328*)   | STOP GAINED |
| P46 | THADA     | c.627A>C(p.Q209H)   | MISSENSE    |
| P46 | NFE2L2    | c.1687G>A(p.E563K)  | MISSENSE    |
| P46 | LRP1B     | c.7333G>A(p.D2445N) | MISSENSE    |
| P46 | TUBB3     | c.185G>A(p.R62Q)    | MISSENSE    |
| P46 | MAP2K4    | c.658A>C(p.K220Q)   | MISSENSE    |

|     |         |                        |             |
|-----|---------|------------------------|-------------|
| P46 | AR      | c.1974G>T(p.Q658H)     | MISSENSE    |
| P46 | ATR     | c.7282C>A(p.L2428I)    | MISSENSE    |
| P46 | TOP2A   | c.1683G>A(p.W561*)     | STOP GAINED |
| P46 | APC     | c.2828C>A(p.S943*)     | STOP GAINED |
| P46 | ROS1    | c.3730G>T(p.E1244*)    | STOP GAINED |
| P46 | ATRX    | c.6301G>T(p.E2101*)    | STOP GAINED |
| P46 | DPYD    | c.2682G>T(p.K894N)     | MISSENSE    |
| P46 | PKHD1   | c.11021G>A(p.S3674N)   | MISSENSE    |
| P46 | MRE11A  | c.42A>C(p.K14N)        | MISSENSE    |
| P46 | GRIN2A  | c.1663G>A(p.A555T)     | MISSENSE    |
| P46 | TEK     | c.2475A>C(p.K825N)     | MISSENSE    |
| P46 | RAC1    | c.73A>T(p.T25S)        | MISSENSE    |
| P46 | WT1     | c.599G>A(p.S200N)      | MISSENSE    |
| P46 | ABCB1   | c.122G>A(p.R41H)       | MISSENSE    |
| P46 | STAT3   | c.148G>T(p.E50*)       | STOP GAINED |
| P46 | ATIC    | c.1135C>T(p.R379*)     | STOP GAINED |
| P46 | ATR     | c.3118T>G(p.L1040V)    | MISSENSE    |
| P46 | LRP1B   | c.9086G>A(p.S3029N)    | MISSENSE    |
| P46 | CCNE1   | c.72C>A(p.F24L)        | MISSENSE    |
| P46 | MET     | c.1235G>A(p.R412H)     | MISSENSE    |
| P46 | ZNF217  | c.363G>T(p.K121N)      | MISSENSE    |
| P46 | PTPN13  | c.2480C>A(p.S827Y)     | MISSENSE    |
| P46 | FANCD2  | c.3857A>G(p.D1286G)    | MISSENSE    |
| P46 | APC     | c.6709C>T(p.R2237*)    | STOP GAINED |
| P46 | PPP2R1A | c.1627T>C(p.S543P)     | MISSENSE    |
| P46 | CTNNB1  | c.1544G>A(p.R515Q)     | MISSENSE    |
| P46 | CXCR4   | c.421G>A(p.A141T)      | MISSENSE    |
| P46 | GNAS    | c.595C>T(p.R199C)      | MISSENSE    |
| P46 | CBL     | c.2363G>A(p.R788Q)     | MISSENSE    |
| P46 | MCL1    | c.437T>C(p.L146S)      | MISSENSE    |
| P46 | STAG2   | c.2998C>T(p.L1000F)    | MISSENSE    |
| P46 | ATR     | c.442G>T(p.E148*)      | STOP GAINED |
| P46 | PIK3CA  | c.1624G>A(p.E542K)     | MISSENSE    |
| P46 | BAD     | c.146G>A(p.S49N)       | MISSENSE    |
| P46 | SMAD4   | c.404G>A(p.R135Q)      | MISSENSE    |
| P46 | MITF    | c.217C>T(p.R73C)       | MISSENSE    |
| P46 | POLE    | c.1331T>A(p.M444K)     | MISSENSE    |
| P46 | EP300   | c.2891C>A(p.S964Y)     | MISSENSE    |
| P47 | DICER1  | c.5552G>A(p.R1851H)    | MISSENSE    |
| P47 | KRAS    | c.34G>T(p.G12C)        | MISSENSE    |
| P47 | APC     | c.4486delA(p.T1496Lfs) | FRAMESHIFT  |
| P47 | FANCG   | c.176-2A>C             | SPLICE      |
| P47 | LRP1B   | c.5037G>C(p.R1679S)    | MISSENSE    |
| P47 | APC     | c.2626C>T(p.R876*)     | STOP GAINED |
| P47 | TP63    | c.535G>A(p.V179M)      | MISSENSE    |
| P47 | TP53    | c.818G>A(p.R273H)      | MISSENSE    |
| P47 | PREX2   | c.1037C>G(p.P346R)     | MISSENSE    |

|     |        |                                      |             |
|-----|--------|--------------------------------------|-------------|
| P48 | RB1    | c.2263T>A(p.F755I)                   | MISSENSE    |
| P48 | NOTCH2 | c.7255C>A(p.P2419T)                  | MISSENSE    |
| P48 | TAP1   | c.1904G>A(p.R635H)                   | MISSENSE    |
| P48 | SPRED1 | c.1262T>A(p.V421D)                   | MISSENSE    |
| P48 | LHCGR  | c.1664A>G(p.N555S)                   | MISSENSE    |
| P48 | PIK3CA | c.3012G>A(p.M1004I)                  | MISSENSE    |
| P48 | PBRM1  | c.2776dupA(p.R926Kfs <sup>1</sup> )  | FRAMESHIFT  |
| P48 | CHD8   | c.4658G>A(p.R1553Q)                  | MISSENSE    |
| P48 | FGFR2  | c.308G>A(p.G103D)                    | MISSENSE    |
| P48 | LRP1B  | c.4723T>A(p.F1575I)                  | MISSENSE    |
| P48 | EPHA3  | c.1306G>A(p.A436T)                   | MISSENSE    |
| P48 | APC    | c.2461_2462delGT(p.V <sup>1</sup> )  | FRAMESHIFT  |
| P48 | ROS1   | c.6176T>G(p.L2059R)                  | MISSENSE    |
| P48 | RAD50  | c.3163delA(p.S1055Vfs <sup>1</sup> ) | FRAMESHIFT  |
| P48 | RAD50  | c.1376dupA(p.N459Kfs <sup>1</sup> )  | FRAMESHIFT  |
| P48 | ERBB2  | c.2990C>T(p.A997V)                   | MISSENSE    |
| P48 | JAK1   | c.1289dupC(p.L431Vfs <sup>*</sup> )  | FRAMESHIFT  |
| P48 | JARID2 | c.1186dupG(p.A396Gfs <sup>1</sup> )  | FRAMESHIFT  |
| P48 | KMT2A  | c.2317_2318dupCC(p.S <sup>1</sup> )  | FRAMESHIFT  |
| P48 | PKHD1  | c.11763delA(p.E3922Kf <sup>1</sup> ) | FRAMESHIFT  |
| P48 | MLH3   | c.3137G>A(p.R1046Q)                  | MISSENSE    |
| P48 | RNF43  | c.1576G>A(p.V526M)                   | MISSENSE    |
| P48 | LZTR1  | c.2317G>A(p.V773M)                   | MISSENSE    |
| P48 | CHD8   | c.5783G>A(p.R1928Q)                  | MISSENSE    |
| P48 | PMS2   | c.1239dupA(p.D414Rfs <sup>1</sup> )  | FRAMESHIFT  |
| P48 | APC    | c.646C>T(p.R216 <sup>*</sup> )       | STOP GAINED |
| P48 | SMO    | c.635G>A(p.G212D)                    | MISSENSE    |
| P48 | MSH6   | c.3260_3261dupCC(p.F <sup>1</sup> )  | FRAMESHIFT  |
| P48 | FLCN   | c.1285dupC(p.H429Pfs <sup>1</sup> )  | FRAMESHIFT  |
| P48 | BUB1B  | c.2488G>A(p.D830N)                   | MISSENSE    |
| P48 | IGF2   | c.536G>A(p.R179Q)                    | MISSENSE    |
| P48 | RARA   | c.574C>T(p.R192C)                    | MISSENSE    |
| P48 | LZTR1  | c.1217C>T(p.T406M)                   | MISSENSE    |
| P48 | FLCN   | c.1285delC(p.H429Tfs <sup>*</sup> )  | FRAMESHIFT  |
| P48 | ATM    | c.8704A>G(p.T2902A)                  | MISSENSE    |
| P48 | B2M    | c.293A>G(p.Y98C)                     | MISSENSE    |
| P48 | AIP    | c.325G>A(p.A109T)                    | MISSENSE    |
| P48 | IFNGR2 | c.961T>C(p.S321P)                    | MISSENSE    |
| P48 | PMS2   | c.353G>A(p.S118N)                    | MISSENSE    |
| P48 | ARID1A | c.936dupC(p.G313Rfs <sup>*†</sup> )  | FRAMESHIFT  |
| P48 | MSH6   | c.3261dupC(p.F1088Lfs <sup>1</sup> ) | FRAMESHIFT  |
| P48 | ERBB2  | c.2524G>A(p.V842I)                   | MISSENSE    |
| P48 | ASXL1  | c.1934dupG(p.G646Wf <sup>1</sup> )   | FRAMESHIFT  |
| P48 | MUTYH  | c.389-2A>C                           | SPLICE      |
| P48 | ATR    | c.6700A>G(p.S2234G)                  | MISSENSE    |
| P48 | PIK3R2 | c.1712G>T(p.R571L)                   | MISSENSE    |
| P48 | PMS1   | c.2766delT(p.H923Ifs <sup>*3</sup> ) | FRAMESHIFT  |

|     |        |                        |               |
|-----|--------|------------------------|---------------|
| P49 | RUNX1  | c.318G>A(p.W106*)      | STOP GAINED   |
| P49 | KRAS   | c.35G>T(p.G12V)        | MISSENSE      |
| P49 | CHD4   | CHD4:exon30~IGR (ups   | FUSION        |
| P49 | TP53   | c.844C>T(p.R282W)      | MISSENSE      |
| P49 | KMT2C  | c.2759dupT(p.L921Ifs*1 | FRAMESHIFT    |
| P49 | APC    | c.2413C>T(p.R805*)     | STOP GAINED   |
| P50 | ASXL1  | c.1934dupG(p.G646Wf:   | FRAMESHIFT    |
| P50 | ATM    | c.8190G>T(p.Q2730H)    | MISSENSE      |
| P50 | MTOR   | c.6422C>A(p.P2141Q)    | MISSENSE      |
| P50 | APC    | c.694C>T(p.R232*)      | STOP GAINED   |
| P50 | ERBB4  | c.671delC(p.P224Lfs*2; | FRAMESHIFT    |
| P50 | AMER1  | c.2156T>C(p.M719T)     | MISSENSE      |
| P50 | KRAS   | c.35G>T(p.G12V)        | MISSENSE      |
| P50 | CHD4   | c.4018C>T(p.R1340C)    | MISSENSE      |
| P51 | KRAS   | c.35G>T(p.G12V)        | MISSENSE      |
| P51 | BRAF   | c.1781A>G(p.D594G)     | MISSENSE      |
| P51 | ERBB2  | c.2033G>A(p.R678Q)     | MISSENSE      |
| P51 | FAT1   | c.7361G>A(p.R2454Q)    | MISSENSE      |
| P51 | APC    | c.4921G>T(p.V1641L)    | MISSENSE      |
| P52 | LRP1B  | c.7707G>T(p.K2569N)    | MISSENSE      |
| P52 | APC    | c.1660C>T(p.R554*)     | STOP GAINED   |
| P52 | EPHA3  | c.2740C>T(p.R914C)     | MISSENSE      |
| P52 | WRN    | c.1298A>G(p.D433G)     | MISSENSE      |
| P52 | APC    | c.3928A>T(p.K1310*)    | STOP GAINED   |
| P52 | TP53   | c.637C>T(p.R213*)      | STOP GAINED   |
| P52 | PIK3CA | c.1624G>A(p.E542K)     | MISSENSE      |
| P52 | KDM5A  | c.2356G>A(p.D786N)     | MISSENSE      |
| P53 | DICER1 | c.1219G>T(p.D407Y)     | MISSENSE      |
| P53 | MTOR   | c.7499T>A(p.I2500N)    | MISSENSE      |
| P53 | PIK3CA | c.1633G>A(p.E545K)     | MISSENSE      |
| P53 | CTNNB1 | c.13+91_181del         | SPLICE        |
| P53 | KRAS   | c.35G>A(p.G12D)        | MISSENSE      |
| P54 | NRAS   | c.182A>T(p.Q61L)       | MISSENSE      |
| P54 | ARAF   | c.133_134del(p.L45R)   | FRAMESHIFT    |
| P54 | SMAD4  | c.1333C>T(p.R445*)     | STOP GAINED   |
| P54 | FANCA  | c.967A>T(p.T323S)      | MISSENSE      |
| P54 | RNF43  | c.505G>A(p.A169T)      | MISSENSE      |
| P54 | NTRK2  | c.1388G>C(p.G463A)     | MISSENSE      |
| P54 | TP53   | c.818G>A(p.R273H)      | MISSENSE      |
| P54 | CREBBP | c.2431G>T(p.G811W)     | MISSENSE      |
| P55 | FBXW7  | c.1039C>T(p.R347C)     | MISSENSE      |
| P55 | SRC    |                        | Amplification |
| P55 | APC    | c.2351del(p.S784Ffs*   | FRAMESHIFT    |
| P55 | SKP2   | c.127A>T(p.K43*)       | STOP GAINED   |
| P55 | TERT   | c.1291C>A(p.P431T)     | MISSENSE      |
| P55 | APC    | c.1312+2T>C            | SPLICE        |

|     |        |                      |               |
|-----|--------|----------------------|---------------|
| P55 | PGR    | c.1867C>T(p.R623C)   | MISSENSE      |
| P55 | TP53   | c.818G>A(p.R273H)    | MISSENSE      |
| P55 | KRAS   | c.35G>T(p.G12V)      | MISSENSE      |
| P55 | FAT1   | c.10431_10433del(p.  | INFRAME INDEL |
| P55 | ZNF217 |                      | Amplification |
| P55 | TOP1   |                      | Amplification |
| P56 | ALK    | c.4460C>T(p.S1487L)  | MISSENSE      |
| P56 | BUB1B  | c.2983A>G(p.K995E)   | MISSENSE      |
| P56 | RNF43  | c.351_352insAC(p.P1  | FRAMESHIFT    |
| P56 | PIK3CA | c.3129G>T(p.M1043I)  | MISSENSE      |
| P56 | RNF43  | c.350G>C(p.R117P)    | MISSENSE      |
| P56 | APC    | c.637C>T(p.R213*)    | STOP GAINED   |
| P56 | KIT    | c.1588G>A(p.V530I)   | MISSENSE      |
| P56 | ESR1   | c.1712C>T(p.A571V)   | MISSENSE      |
| P56 | APC    | c.3927_3931del(p.E1  | FRAMESHIFT    |
| P56 | ATM    | c.1899-2_1914del     | SPLICE        |
| P56 | KRAS   | c.35G>A(p.G12D)      | MISSENSE      |
| P57 | EGFR   |                      | Amplification |
| P57 | APC    | c.1312+1G>A          | SPLICE        |
| P57 | TP53   | c.844C>T(p.R282W)    | MISSENSE      |
| P57 | RICTOR | RICTOR:exon4~IGR (u  | FUSION        |
| P58 | ERBB4  | c.2479A>G(p.I827V)   | MISSENSE      |
| P58 | KDM5A  | c.4440C>G(p.F1480L)  | MISSENSE      |
| P58 | BMPR1A | c.1441C>T(p.P481S)   | MISSENSE      |
| P58 | NOTCH2 | c.6498del(p.S2167Lfs | FRAMESHIFT    |
| P58 | FANCG  | c.1733C>T(p.T578I)   | MISSENSE      |
| P58 | KRAS   | c.35G>A(p.G12D)      | MISSENSE      |
| P58 | JAK3   | c.1511C>T(p.S504F)   | MISSENSE      |
| P58 | PKHD1  | c.1154C>G(p.T385R)   | MISSENSE      |
| P58 | BMPR1A | c.1362del(p.Q454Hfs  | FRAMESHIFT    |
| P58 | BTK    | c.868C>T(p.Q290*)    | STOP GAINED   |
| P58 | PTEN   | c.976G>C(p.D326H)    | MISSENSE      |
| P58 | AKT1   | c.968G>T(p.D323Y)    | MISSENSE      |
| P58 | TEK    | c.3178C>T(p.P1060S)  | MISSENSE      |
| P58 | TP53   | c.818G>A(p.R273H)    | MISSENSE      |
| P58 | PAK3   | c.118G>C(p.E40Q)     | MISSENSE      |
| P58 | SPRY4  | c.366C>G(p.D122E)    | MISSENSE      |
| P58 | CUL3   | c.765G>T(p.L255F)    | MISSENSE      |
| P59 | APC    | c.694C>T(p.R232*)    | STOP GAINED   |
| P59 | TP53   | c.747G>C(p.R249S)    | MISSENSE      |
| P60 | FLT1   |                      | Amplification |
| P60 | CXCR4  | c.575G>A(p.R192H)    | MISSENSE      |
| P60 | GNAS   | c.215C>T(p.S72L)     | MISSENSE      |
| P60 | FLT3   |                      | Amplification |



|     |         |                       |               |
|-----|---------|-----------------------|---------------|
| P60 | MSH2    | c.2008C>T(p.P670S)    | MISSENSE      |
| P60 | LHCGR   | c.1435C>T(p.R479*)    | STOP GAINED   |
| P60 | TP53    | c.535C>T(p.H179Y)     | MISSENSE      |
| P60 | TP53    | c.525_530delinsTG(p.  | FRAMESHIFT    |
| P60 | MAP2K1  | c.171G>T(p.K57N)      | MISSENSE      |
| P60 | APC     | c.4478_4479delinsA(p. | FRAMESHIFT    |
| P60 | APC     | c.3897_3907del(p.T1:  | FRAMESHIFT    |
| P61 | CREBBP  | c.1063C>T(p.Q355*)    | STOP GAINED   |
| P61 | TP53    | c.733G>A(p.G245S)     | MISSENSE      |
| P61 | APC     | c.2512A>T(p.R838*)    | STOP GAINED   |
| P61 | BRD4    | c.152C>G(p.S51C)      | MISSENSE      |
| P61 | AKT2    | IQR (downstream UQ    | FUSION        |
| P61 | FBXW7   | c.1336_1338del(p.R4:  | INFRAME INDEL |
| P61 | PPP2R1A | c.547C>T(p.R183W)     | MISSENSE      |
| P61 | EGFR    |                       | Amplification |
| P61 | BRD4    | c.196C>A(p.L66M)      | MISSENSE      |
| P62 | LRP1B   | c.3214C>T(p.R1072C)   | MISSENSE      |
| P62 | CREBBP  | c.3349C>A(p.P1117T)   | MISSENSE      |
| P62 | KRAS    | c.38G>A(p.G13D)       | MISSENSE      |
| P62 | FLCN    | c.250_295dup(p.D99:   | STOP GAINED   |
| P62 | NTRK3   | c.640G>A(p.V214M)     | MISSENSE      |
| P62 | ASXL1   | c.2077C>T(p.R693*)    | STOP GAINED   |
| P62 | TP53    | c.524G>A(p.R175H)     | MISSENSE      |
| P63 | PIK3CA  | c.1638G>C(p.Q546H)    | MISSENSE      |
| P63 | KRAS    | c.34G>T(p.G12C)       | MISSENSE      |
| P63 | TP53    | c.395A>C(p.K132T)     | MISSENSE      |
| P63 | APC     | c.4666dup(p.T1556N)   | FRAMESHIFT    |
| P63 | AMER1   | c.1489C>T(p.R497*)    | STOP GAINED   |
| P63 | PDE11A  | c.1105G>A(p.A369T)    | MISSENSE      |
| P63 | PKHD1   | c.3805G>A(p.V1269M)   | MISSENSE      |
| P63 | NOTCH1  | c.2357C>T(p.P786L)    | MISSENSE      |
| P63 | SMAD4   | c.1607T>C(p.L536P)    | MISSENSE      |
| P63 | APC     |                       | Deletion      |
| P64 | BRAF    | c.1406G>C(p.G469A)    | MISSENSE      |
| P64 | RECQL4  | c.1151G>A(p.R384Q)    | MISSENSE      |
| P64 | APC     | c.4606G>T(p.E1536*)   | STOP GAINED   |
| P64 | FANCA   | c.74T>A(p.L25Q)       | MISSENSE      |
| P64 | DNMT3A  | c.196C>A(p.P66T)      | MISSENSE      |
| P64 | RNF43   | c.1825C>T(p.R609W)    | MISSENSE      |
| P64 | SMAD4   | c.1082G>A(p.R361H)    | MISSENSE      |
| P64 | TP53    | c.817C>T(p.R273C)     | MISSENSE      |
| P64 | CDC73   | c.559G>C(p.A187P)     | MISSENSE      |
| P65 | BRCA2   | c.6952C>T(p.R2318*)   | STOP GAINED   |
| P65 | TOP1    | c.829A>C(p.N277H)     | MISSENSE      |

|     |         |                     |             |
|-----|---------|---------------------|-------------|
| P65 | ATRX    | c.3195G>T(p.E1065D) | MISSENSE    |
| P65 | TSHR    | c.325C>T(p.R109W)   | MISSENSE    |
| P65 | NTRK1   | c.2005T>G(p.F669V)  | MISSENSE    |
| P65 | NF1     | c.4084C>T(p.R1362*) | STOP GAINED |
| P65 | XPC     | c.2497G>T(p.E833*)  | STOP GAINED |
| P65 | CUL3    | c.532G>T(p.E178*)   | STOP GAINED |
| P65 | ATRX    | c.550G>T(p.D184Y)   | MISSENSE    |
| P65 | GRIN2A  | c.1918A>G(p.I640V)  | MISSENSE    |
| P65 | FLT4    | c.1696G>A(p.E566K)  | MISSENSE    |
| P65 | DTL     | c.612G>T(p.Q204H)   | MISSENSE    |
| P65 | PREX2   | c.2473T>C(p.Y825H)  | MISSENSE    |
| P65 | AKT3    | c.497G>A(p.R166Q)   | MISSENSE    |
| P65 | RAD54L  | c.1062G>T(p.K354N)  | MISSENSE    |
| P65 | PPP2R1A | c.82C>T(p.R28C)     | MISSENSE    |
| P65 | APC     | c.688C>T(p.R230C)   | MISSENSE    |
| P65 | IDH1    | c.59G>T(p.R20L)     | MISSENSE    |
| P65 | FAT1    | c.5050A>C(p.S1684R) | MISSENSE    |
| P65 | MSH2    | c.1588G>T(p.E530*)  | STOP GAINED |
| P65 | ABCB1   | c.160G>T(p.G54*)    | STOP GAINED |
| P65 | FBXW7   | c.286G>T(p.E96*)    | STOP GAINED |
| P65 | CDK12   | c.3308-1G>A         | SPLICE      |
| P65 | EGFR    | c.382A>G(p.N128D)   | MISSENSE    |
| P65 | PDE11A  | c.1034T>G(p.I345S)  | MISSENSE    |
| P65 | LRP1B   | c.3041C>A(p.S1014Y) | MISSENSE    |
| P65 | BRCA2   | c.3459G>T(p.K1153N) | MISSENSE    |
| P65 | PTEN    | c.996A>C(p.K332N)   | MISSENSE    |
| P65 | DDR2    | c.1049A>G(p.Y350C)  | MISSENSE    |
| P65 | TUBB3   | c.795C>A(p.F265L)   | MISSENSE    |
| P65 | EPAS1   | c.910A>C(p.S304R)   | MISSENSE    |
| P65 | NSD1    | c.507G>T(p.K169N)   | MISSENSE    |
| P65 | LHCGR   | c.505T>G(p.F169V)   | MISSENSE    |
| P65 | NSD1    | c.5149C>T(p.R1717C) | MISSENSE    |
| P65 | ATM     | c.742C>T(p.R248*)   | STOP GAINED |
| P65 | FANCC   | c.1555A>G(p.T519A)  | MISSENSE    |
| P65 | GRM8    | c.1146G>T(p.K382N)  | MISSENSE    |
| P65 | KMT2A   | c.444C>A(p.F148L)   | MISSENSE    |
| P65 | GRIN2A  | c.3843G>T(p.K1281N) | MISSENSE    |
| P65 | ROS1    | c.6629G>T(p.R2210I) | MISSENSE    |
| P65 | SETD2   | c.1715C>A(p.S572Y)  | MISSENSE    |
| P65 | IL7R    | c.638T>G(p.F213C)   | MISSENSE    |
| P65 | CXCR4   | c.1056T>G(p.S352R)  | MISSENSE    |
| P65 | MRE11   | c.1561G>T(p.E521*)  | STOP GAINED |
| P65 | SMAD2   | c.565G>T(p.E189*)   | STOP GAINED |
| P65 | SETD2   | c.3694A>T(p.K1232*) | STOP GAINED |

|     |        |                     |             |
|-----|--------|---------------------|-------------|
| P65 | JUN    | c.907G>T(p.E303*)   | STOP GAINED |
| P65 | PDE11A | c.1029C>A(p.F343L)  | MISSENSE    |
| P65 | SETBP1 | c.3436C>T(p.R1146W) | MISSENSE    |
| P65 | NSD1   | c.758A>C(p.K253T)   | MISSENSE    |
| P65 | CYP2D6 | c.909C>A(p.F303L)   | MISSENSE    |
| P65 | GRM3   | c.1004G>A(p.R335H)  | MISSENSE    |
| P65 | APC    | c.4199C>T(p.S1400L) | MISSENSE    |
| P65 | RAD51C | c.940A>C(p.I314L)   | MISSENSE    |
| P65 | GATA4  | c.775C>T(p.R259C)   | MISSENSE    |
| P65 | HDAC9  | c.1259C>A(p.S420Y)  | MISSENSE    |
| P65 | WISP3  | c.761G>A(p.S254N)   | MISSENSE    |
| P65 | FAT1   | c.10045G>A(p.V3349) | MISSENSE    |
| P65 | NSD1   | c.2101G>A(p.D701N)  | MISSENSE    |
| P65 | IFNGR2 | c.995A>C(p.K332T)   | MISSENSE    |
| P65 | AKT3   | c.1192G>T(p.E398*)  | STOP GAINED |
| P65 | TAP1   | c.1227C>A(p.Y409*)  | STOP GAINED |
| P65 | FAT1   | c.2752G>T(p.E918*)  | STOP GAINED |
| P65 | PTCH1  | c.2145C>A(p.F715L)  | MISSENSE    |
| P65 | DDR2   | c.724T>G(p.F242V)   | MISSENSE    |
| P65 | BLM    | c.1537A>C(p.K513Q)  | MISSENSE    |
| P65 | RAD51D | c.629C>T(p.A210V)   | MISSENSE    |
| P65 | ERBB4  | c.3668A>G(p.N1223S) | MISSENSE    |
| P65 | DICER1 | c.4928A>G(p.K1643R) | MISSENSE    |
| P65 | PTK2   | c.2123A>C(p.Q708P)  | MISSENSE    |
| P65 | KDM5A  | c.4483A>C(p.K1495Q) | MISSENSE    |
| P65 | ERBB4  | c.3128C>T(p.S1043L) | MISSENSE    |
| P65 | KDM5A  | c.559G>T(p.D187Y)   | MISSENSE    |
| P65 | CHD4   | c.4657A>G(p.T1553A) | MISSENSE    |
| P65 | ZNF217 | c.2222A>C(p.K741T)  | MISSENSE    |
| P65 | SRC    | c.95T>A(p.F32Y)     | MISSENSE    |
| P65 | PIK3C3 | c.66G>T(p.K22N)     | MISSENSE    |
| P65 | PIK3R1 | c.232C>T(p.R78*)    | STOP GAINED |
| P65 | FGFR2  | c.2306A>G(p.Y769C)  | MISSENSE    |
| P65 | PTPN13 | c.3396T>G(p.S1132R) | MISSENSE    |
| P65 | FLT3   | c.2779G>A(p.A927T)  | MISSENSE    |
| P65 | ERBB4  | c.2131C>T(p.R711C)  | MISSENSE    |
| P65 | ERCC2  | c.1264G>T(p.D422Y)  | MISSENSE    |
| P65 | POLE   | c.857C>G(p.P286R)   | MISSENSE    |
| P65 | DOT1L  | c.850T>G(p.L284V)   | MISSENSE    |
| P65 | PDGFRB | c.2225A>G(p.D742G)  | MISSENSE    |
| P65 | EMSY   | c.566T>C(p.V189A)   | MISSENSE    |
| P65 | IGF1R  | c.625A>C(p.N209H)   | MISSENSE    |
| P65 | IFNA6  | c.282G>T(p.K94N)    | MISSENSE    |
| P65 | NSD1   | c.5278A>G(p.T1760A) | MISSENSE    |

|     |        |                     |             |
|-----|--------|---------------------|-------------|
| P65 | KMT2B  | c.1966G>A(p.E656K)  | MISSENSE    |
| P65 | CEP57  | c.1417A>C(p.K473Q)  | MISSENSE    |
| P65 | AXL    | c.1315C>T(p.R439C)  | MISSENSE    |
| P65 | BRCA1  | c.3690A>C(p.L1230F) | MISSENSE    |
| P65 | POLH   | c.241C>T(p.R81C)    | MISSENSE    |
| P65 | FAT1   | c.922T>C(p.S308P)   | MISSENSE    |
| P65 | BLM    | c.3553T>G(p.L1185V) | MISSENSE    |
| P65 | ALK    | c.776G>A(p.R259H)   | MISSENSE    |
| P65 | FANCD2 | c.1610G>T(p.S537I)  | MISSENSE    |
| P65 | CDK8   | c.196G>T(p.E66*)    | STOP GAINED |
| P65 | FBXW7  | c.289G>T(p.E97*)    | STOP GAINED |
| P65 | ARID1A | c.1820C>A(p.S607*)  | STOP GAINED |
| P65 | ERCC1  | c.661G>A(p.D221N)   | MISSENSE    |
| P65 | KMT2B  | c.1430G>T(p.S477I)  | MISSENSE    |
| P65 | KDR    | c.2053G>A(p.E685K)  | MISSENSE    |
| P65 | SMAD2  | c.962G>A(p.R321Q)   | MISSENSE    |
| P65 | MAP3K1 | c.1918T>C(p.S640P)  | MISSENSE    |
| P65 | ATF1   | c.691C>T(p.R231C)   | MISSENSE    |
| P65 | TERT   | c.2264T>G(p.V755G)  | MISSENSE    |
| P65 | FAT1   | c.5177A>G(p.D1726G) | MISSENSE    |
| P65 | CTNNB1 | c.966A>C(p.Q322H)   | MISSENSE    |
| P65 | ATIC   | c.1136G>A(p.R379Q)  | MISSENSE    |
| P65 | CHD8   | c.3214A>G(p.T1072A) | MISSENSE    |
| P65 | BMPR1A | c.1411C>T(p.R471C)  | MISSENSE    |
| P65 | ATR    | c.2116G>T(p.E706*)  | STOP GAINED |
| P65 | TP53   | c.637C>T(p.R213*)   | STOP GAINED |
| P65 | SETD2  | c.2872T>G(p.C958G)  | MISSENSE    |
| P65 | BRCA2  | c.8496G>T(p.E2832D) | MISSENSE    |
| P65 | EXT2   | c.402G>T(p.K134N)   | MISSENSE    |
| P65 | FBXW7  | c.1711C>T(p.R571W)  | MISSENSE    |
| P65 | ATM    | c.3617T>C(p.L1206S) | MISSENSE    |
| P65 | PKHD1  | c.949G>T(p.D317Y)   | MISSENSE    |
| P65 | CRKL   | c.216G>T(p.K72N)    | MISSENSE    |
| P65 | EXT1   | c.593G>A(p.G198D)   | MISSENSE    |
| P65 | PLCB4  | c.224A>C(p.K75T)    | MISSENSE    |
| P65 | APC    | c.2891T>G(p.L964*)  | STOP GAINED |
| P65 | ROS1   | c.1931A>C(p.K644T)  | MISSENSE    |
| P65 | NRG1   | c.862C>T(p.R288W)   | MISSENSE    |
| P65 | NSD1   | c.444T>G(p.I148M)   | MISSENSE    |
| P65 | GRIN2A | c.262G>A(p.D88N)    | MISSENSE    |
| P65 | PIK3CA | c.263G>A(p.R88Q)    | MISSENSE    |
| P65 | ERBB4  | c.2605G>A(p.E869K)  | MISSENSE    |
| P65 | APC    | c.7862C>A(p.S2621Y) | MISSENSE    |
| P65 | LHCGR  | c.425C>T(p.T142M)   | MISSENSE    |

|     |         |                      |             |
|-----|---------|----------------------|-------------|
| P65 | APC     | c.6077C>A(p.S2026Y)  | MISSENSE    |
| P65 | BRCA2   | c.5063A>C(p.E1688A)  | MISSENSE    |
| P65 | KDR     | c.858G>T(p.K286N)    | MISSENSE    |
| P65 | TNFSF11 | c.940C>T(p.R314*)    | STOP GAINED |
| P65 | FANCI   | c.250G>T(p.E84*)     | STOP GAINED |
| P65 | ATM     | c.895G>T(p.E299*)    | STOP GAINED |
| P65 | EP300   | c.149C>T(p.S50F)     | MISSENSE    |
| P65 | DENND1A | c.2348C>T(p.A783V)   | MISSENSE    |
| P65 | DPYD    | c.893C>T(p.T298M)    | MISSENSE    |
| P65 | GRIN2A  | c.2954C>T(p.P985L)   | MISSENSE    |
| P65 | TAP1    | c.1372A>C(p.K458Q)   | MISSENSE    |
| P65 | CHD4    | c.4013G>T(p.R1338I)  | MISSENSE    |
| P65 | MYCL    | c.598A>C(p.I200L)    | MISSENSE    |
| P65 | PREX2   | c.4091T>C(p.V1364A)  | MISSENSE    |
| P65 | CASP8   | c.203G>A(p.R68Q)     | MISSENSE    |
| P65 | KMT2A   | c.6185G>A(p.R2062H)  | MISSENSE    |
| P65 | FLT3    | c.1826A>G(p.N609S)   | MISSENSE    |
| P65 | LRP1B   | c.8330G>A(p.R2777Q)  | MISSENSE    |
| P65 | ERBIN   | c.2179G>T(p.D727Y)   | MISSENSE    |
| P65 | RICTOR  | c.665G>A(p.R222Q)    | MISSENSE    |
| P65 | MAP2K4  | c.433C>T(p.R145W)    | MISSENSE    |
| P65 | APC     | c.2756G>T(p.R919I)   | MISSENSE    |
| P65 | PBRM1   | c.1564C>T(p.R522*)   | STOP GAINED |
| P65 | CDK8    | c.709C>T(p.R237*)    | STOP GAINED |
| P65 | NRG1    | c.841G>T(p.D281Y)    | MISSENSE    |
| P65 | SMO     | c.2002C>T(p.R668C)   | MISSENSE    |
| P65 | CASP8   | c.245G>T(p.R82I)     | MISSENSE    |
| P65 | RICTOR  | c.839G>A(p.R280Q)    | MISSENSE    |
| P65 | ALK     | c.1982A>G(p.N661S)   | MISSENSE    |
| P65 | CREBBP  | c.3832G>A(p.E1278K)  | MISSENSE    |
| P65 | ATR     | c.3938A>C(p.K1313T)  | MISSENSE    |
| P65 | PLCB4   | c.2221C>T(p.R741C)   | MISSENSE    |
| P65 | FLT1    | c.3671G>T(p.R1224I)  | MISSENSE    |
| P65 | CTLA4   | c.554C>A(p.S185Y)    | MISSENSE    |
| P65 | AR      | c.689C>T(p.S230L)    | MISSENSE    |
| P65 | NTRK1   | c.2212G>A(p.D738N)   | MISSENSE    |
| P65 | ERBB4   | c.2525G>A(p.R842Q)   | MISSENSE    |
| P65 | CBLB    | c.1529G>A(p.R510H)   | MISSENSE    |
| P65 | BRD4    | c.8C>T(p.A3V)        | MISSENSE    |
| P65 | SPRED1  | c.138A>T(p.K46N)     | MISSENSE    |
| P65 | POLE    | c.671A>G(p.Y224C)    | MISSENSE    |
| P65 | PRSS1   | c.74T>G(p.V25G)      | MISSENSE    |
| P65 | PKHD1   | c.11006C>T(p.S3669L) | MISSENSE    |
| P65 | PKHD1   | c.2900A>G(p.N967S)   | MISSENSE    |

|     |         |                      |             |
|-----|---------|----------------------|-------------|
| P65 | GRIN2A  | c.2865T>G(p.I955M)   | MISSENSE    |
| P65 | WRN     | c.2972C>A(p.S991Y)   | MISSENSE    |
| P65 | LYN     | c.266A>C(p.K89T)     | MISSENSE    |
| P65 | PGR     | c.415T>G(p.S139A)    | MISSENSE    |
| P65 | CTCF    | c.766A>C(p.K256Q)    | MISSENSE    |
| P65 | MAP3K1  | c.3420G>A(p.M1140I)  | MISSENSE    |
| P65 | PBRM1   | c.2128C>T(p.R710*)   | STOP GAINED |
| P65 | ROS1    | c.4765G>T(p.E1589*)  | STOP GAINED |
| P65 | BRCA2   | c.7795G>T(p.E2599*)  | STOP GAINED |
| P65 | PIK3R1  | c.484C>T(p.R162*)    | STOP GAINED |
| P65 | SETD2   | c.2258T>C(p.V753A)   | MISSENSE    |
| P65 | FAT1    | c.12847G>A(p.E4283I) | MISSENSE    |
| P65 | WRN     | c.375A>C(p.K125N)    | MISSENSE    |
| P65 | RICTOR  | c.3793A>C(p.K1265Q)  | MISSENSE    |
| P65 | XRCC2   | c.346T>G(p.F116V)    | MISSENSE    |
| P65 | ATR     | c.3064A>C(p.N1022H)  | MISSENSE    |
| P65 | RNF43   | c.1701G>T(p.R567S)   | MISSENSE    |
| P65 | PIK3R1  | c.880A>G(p.N294D)    | MISSENSE    |
| P65 | ABCB1   | c.788C>A(p.T263N)    | MISSENSE    |
| P65 | PDGFRB  | c.631G>A(p.V211M)    | MISSENSE    |
| P65 | ASXL1   | c.2362G>T(p.E788*)   | STOP GAINED |
| P65 | MSH6    | c.3586G>T(p.E1196*)  | STOP GAINED |
| P65 | TNFAIP3 | c.913G>T(p.E305*)    | STOP GAINED |
| P65 | TSHR    | c.1762A>G(p.T588A)   | MISSENSE    |
| P65 | PIK3CA  | c.1281A>G(p.I427M)   | MISSENSE    |
| P65 | DPYD    | c.2726G>T(p.R909I)   | MISSENSE    |
| P65 | TERT    | c.2684T>C(p.L895P)   | MISSENSE    |
| P65 | ABCB1   | c.2522C>A(p.A841E)   | MISSENSE    |
| P65 | ZNF217  | c.1555G>A(p.E519K)   | MISSENSE    |
| P65 | PALB2   | c.1689G>T(p.K563N)   | MISSENSE    |
| P65 | PKHD1   | c.10822T>G(p.L3608V) | MISSENSE    |
| P65 | BAX     | c.376A>G(p.I126V)    | MISSENSE    |
| P65 | CHEK2   | c.300G>T(p.Q100H)    | MISSENSE    |
| P65 | GRM3    | c.2029G>A(p.A677T)   | MISSENSE    |
| P65 | RAD50   | c.3934C>A(p.H1312N)  | MISSENSE    |
| P65 | KMT2B   | c.368T>G(p.F123C)    | MISSENSE    |
| P65 | PKHD1   | c.6001G>A(p.E2001K)  | MISSENSE    |
| P65 | NSD1    | c.1212G>T(p.E404D)   | MISSENSE    |
| P65 | LRP1B   | c.11846A>C(p.K3949I) | MISSENSE    |
| P65 | PALB2   | c.1348A>C(p.N450H)   | MISSENSE    |
| P65 | B2M     | c.128T>G(p.L43R)     | MISSENSE    |
| P65 | INPP4B  | c.425G>A(p.R142Q)    | MISSENSE    |
| P65 | SETD2   | c.7351G>A(p.A2451T)  | MISSENSE    |
| P65 | ATR     | c.5110G>T(p.E1704*)  | STOP GAINED |

|     |         |                      |             |
|-----|---------|----------------------|-------------|
| P65 | PMS2    | c.1279C>T(p.R427C)   | MISSENSE    |
| P65 | CASP8   | c.1207T>G(p.S403A)   | MISSENSE    |
| P65 | LHCGR   | c.435C>A(p.F145L)    | MISSENSE    |
| P65 | FLT3    | c.866A>G(p.N289S)    | MISSENSE    |
| P65 | ALK     | c.700C>T(p.P234S)    | MISSENSE    |
| P65 | GRM3    | c.1472C>T(p.S491L)   | MISSENSE    |
| P65 | FLT4    | c.3199G>A(p.D1067N)  | MISSENSE    |
| P65 | ROS1    | c.6614G>T(p.R2205I)  | MISSENSE    |
| P65 | ESR1    | c.754A>G(p.K252E)    | MISSENSE    |
| P65 | APC     | c.3514C>A(p.H1172N)  | MISSENSE    |
| P65 | LRP1B   | c.8791T>G(p.L2931V)  | MISSENSE    |
| P65 | EZH2    | c.155G>T(p.R52I)     | MISSENSE    |
| P65 | EZH2    | c.143A>C(p.K48T)     | MISSENSE    |
| P65 | KDM5A   | c.2839G>A(p.E947K)   | MISSENSE    |
| P65 | ABCB1   | c.298G>T(p.D100Y)    | MISSENSE    |
| P65 | ABCB1   | c.1956A>C(p.E652D)   | MISSENSE    |
| P65 | ATM     | c.8386T>G(p.F2796V)  | MISSENSE    |
| P65 | PAX5    | c.316A>C(p.N106H)    | MISSENSE    |
| P65 | FLT3    | c.937C>A(p.L313M)    | MISSENSE    |
| P65 | TP63    | c.566C>T(p.S189L)    | MISSENSE    |
| P65 | MPL     | c.239G>A(p.S80N)     | MISSENSE    |
| P65 | NRG1    | c.302C>T(p.A101V)    | MISSENSE    |
| P65 | LRP1B   | c.10705A>C(p.K3569C) | MISSENSE    |
| P65 | ABCB1   | c.2861C>T(p.A954V)   | MISSENSE    |
| P65 | ATR     | c.5943A>C(p.E1981D)  | MISSENSE    |
| P65 | DPYD    | c.2951A>G(p.D984G)   | MISSENSE    |
| P65 | MLH3    | c.2108A>C(p.K703T)   | MISSENSE    |
| P65 | GRIN2A  | c.1822C>A(p.L608I)   | MISSENSE    |
| P65 | RUNX1T1 | c.1381C>T(p.R461C)   | MISSENSE    |
| P65 | SETD2   | c.3260C>A(p.S1087Y)  | MISSENSE    |
| P65 | GRM8    | c.364G>A(p.A122T)    | MISSENSE    |
| P65 | ROS1    | c.734G>T(p.R245I)    | MISSENSE    |
| P65 | RAD51   | c.223C>A(p.L75M)     | MISSENSE    |
| P65 | NFE2L2  | c.1285G>T(p.E429*)   | STOP GAINED |
| P65 | ROS1    | c.3632A>G(p.N1211S)  | MISSENSE    |
| P65 | STK11   | c.94A>G(p.T32A)      | MISSENSE    |
| P65 | CBLB    | c.2881G>A(p.E961K)   | MISSENSE    |
| P65 | FANCD2  | c.2351C>T(p.S784F)   | MISSENSE    |
| P65 | FAT1    | c.3907G>A(p.E1303K)  | MISSENSE    |
| P65 | FGFR3   | c.1209G>T(p.K403N)   | MISSENSE    |
| P65 | NF1     | c.3297A>C(p.K1099N)  | MISSENSE    |
| P65 | FAT1    | c.3191G>A(p.R1064K)  | MISSENSE    |
| P65 | ARID2   | c.919G>A(p.A307T)    | MISSENSE    |
| P65 | PIK3CA  | c.2373G>T(p.E791D)   | MISSENSE    |

|     |        |                      |             |
|-----|--------|----------------------|-------------|
| P65 | SMAD2  | c.1114A>G(p.T372A)   | MISSENSE    |
| P65 | NBN    | c.1367A>C(p.K456T)   | MISSENSE    |
| P65 | HGF    | c.1141C>A(p.P381T)   | MISSENSE    |
| P65 | FAT1   | c.2101G>A(p.D701N)   | MISSENSE    |
| P65 | HDAC2  | c.1002C>A(p.Y334*)   | STOP GAINED |
| P65 | PKHD1  | c.4975G>T(p.E1659*)  | STOP GAINED |
| P65 | NF1    | c.782A>C(p.K261T)    | MISSENSE    |
| P65 | ERBB4  | c.99G>T(p.E33D)      | MISSENSE    |
| P65 | PTEN   | c.1004G>A(p.R335Q)   | MISSENSE    |
| P65 | PTPN13 | c.3308T>C(p.F1103S)  | MISSENSE    |
| P65 | PKHD1  | c.12147G>T(p.E4049I) | MISSENSE    |
| P65 | NTRK3  | c.363A>C(p.R121S)    | MISSENSE    |
| P65 | FANCL  | c.220A>G(p.M74V)     | MISSENSE    |
| P65 | ERBB3  | c.2226A>C(p.K742N)   | MISSENSE    |
| P65 | FGFR1  | c.1072G>A(p.V358I)   | MISSENSE    |
| P65 | KDR    | c.1812G>T(p.K604N)   | MISSENSE    |
| P65 | RICTOR | c.974G>A(p.R325Q)    | MISSENSE    |
| P65 | ROS1   | c.6436T>C(p.S2146P)  | MISSENSE    |
| P65 | ATR    | c.2905G>T(p.E969*)   | STOP GAINED |
| P65 | BRIP1  | c.493G>T(p.E165*)    | STOP GAINED |
| P65 | APC    | c.4463T>G(p.L1488*)  | STOP GAINED |
| P65 | ARID1B | c.6305T>G(p.L2102*)  | STOP GAINED |
| P65 | PDGFRA | c.2310G>T(p.K770N)   | MISSENSE    |
| P65 | CEP57  | c.614T>G(p.L205R)    | MISSENSE    |
| P65 | DAXX   | c.423G>T(p.K141N)    | MISSENSE    |
| P65 | TTF1   | c.1834G>A(p.D612N)   | MISSENSE    |
| P65 | IGF1R  | c.2056A>G(p.N686D)   | MISSENSE    |
| P65 | CDK8   | c.518A>G(p.D173G)    | MISSENSE    |
| P65 | ATM    | c.3646T>G(p.Y1216D)  | MISSENSE    |
| P65 | BAP1   | c.2182C>T(p.R728C)   | MISSENSE    |
| P65 | CSF1R  | c.881G>A(p.R294Q)    | MISSENSE    |
| P66 | FANCL  | c.925A>G(p.I309V)    | MISSENSE    |
| P67 | SMAD4  | c.1477G>A(p.D493N)   | MISSENSE    |
| P67 | ATR    | c.4037C>T(p.A1346V)  | MISSENSE    |
| P67 | PIK3CA | c.1028A>T(p.Y343F)   | MISSENSE    |
| P67 | SMAD4  | c.1082G>A(p.R361H)   | MISSENSE    |
| P67 | AMER1  | c.1358T>G(p.L453R)   | MISSENSE    |
| P67 | GNAS   | c.683G>A(p.R228H)    | MISSENSE    |
| P67 | KRAS   | c.35G>A(p.G12D)      | MISSENSE    |
| P68 | AXL    | c.277C>A(p.Q93K)     | MISSENSE    |
| P68 | APC    | c.4012C>T(p.Q1338*)  | STOP GAINED |
| P68 | TP53   | c.742C>T(p.R248W)    | MISSENSE    |
| P68 | APC    | c.1495C>T(p.R499*)   | STOP GAINED |
| P68 | LRP1B  | c.3810C>G(p.I1270M)  | MISSENSE    |



|     |         |                       |             |
|-----|---------|-----------------------|-------------|
| P69 | CYP2D6  | c.875A>T(p.D292V)     | MISSENSE    |
| P69 | LHCGR   | c.287del(p.N96Tfs*9)  | FRAMESHIFT  |
| P69 | PTEN    | c.741dup(p.P248Tfs*!  | FRAMESHIFT  |
| P69 | ARID2   | c.214del(p.I72Lfs*18) | FRAMESHIFT  |
| P69 | SETBP1  | c.3983A>G(p.D1328G    | MISSENSE    |
| P69 | ATM     | c.4416_4423dup(p.Y1   | STOP GAINED |
| P69 | PIK3CA  | c.1633G>A(p.E545K)    | MISSENSE    |
| P69 | SMAD3   | c.707C>T(p.S236F)     | MISSENSE    |
| P69 | KRAS    | c.35G>C(p.G12A)       | MISSENSE    |
| P69 | APC     | c.4484del(p.S1495lfs' | FRAMESHIFT  |
| P69 | KRAS    | c.436G>A(p.A146T)     | MISSENSE    |
| P70 | LRP1B   | c.8897G>A(p.C2966Y)   | MISSENSE    |
| P70 | TP53    | c.488A>G(p.Y163C)     | MISSENSE    |
| P70 | PPARD   | c.295C>A(p.R99S)      | MISSENSE    |
| P70 | KRAS    | c.35G>A(p.G12D)       | MISSENSE    |
| P70 | GATA4   | c.307C>T(p.P103S)     | MISSENSE    |
| P70 | APC     | c.4350del(p.E1451Kfs  | FRAMESHIFT  |
| P70 | TOP2A   | c.787C>T(p.P263S)     | MISSENSE    |
| P70 | APC     | c.2626C>T(p.R876*)    | STOP GAINED |
| P70 | PTEN    | c.509G>T(p.S170I)     | MISSENSE    |
| P71 | ALK     | c.3257C>T(p.S1086L)   | MISSENSE    |
| P71 | SMARCA4 | c.701C>T(p.P234L)     | MISSENSE    |
| P71 | SETBP1  | c.3233C>T(p.T1078M    | MISSENSE    |
| P71 | PTEN    | c.634+1G>A            | SPLICE      |
| P71 | TP53    | c.503A>G(p.H168R)     | MISSENSE    |
| P71 | KRAS    | c.35G>T(p.G12V)       | MISSENSE    |
| P71 | APC     | c.3441_3492del(p.Y1   | FRAMESHIFT  |
| P71 | MITF    | c.1093G>A(p.A365T)    | MISSENSE    |
| P71 | CHD4    | c.1169G>A(p.R390H)    | MISSENSE    |
| P71 | GATA4   | c.88G>A(p.A30T)       | MISSENSE    |
| P71 | ATR     | c.2800dup(p.C934Lfs'  | FRAMESHIFT  |
| P71 | PREX2   | c.1211C>G(p.T404S)    | MISSENSE    |
| P72 | APC     | c.1370C>A(p.S457*)    | STOP GAINED |
| P72 | APC     | c.4285C>T(p.Q1429*)   | STOP GAINED |
| P72 | QKI     | c.725G>A(p.R242H)     | MISSENSE    |
| P72 | TP53    | c.376-1G>A            | SPLICE      |
| P72 | PIK3CA  | c.1633G>A(p.E545K)    | MISSENSE    |
| P72 | AXIN2   | c.74C>T(p.P25L)       | MISSENSE    |
| P72 | KRAS    | c.38G>A(p.G13D)       | MISSENSE    |
| P72 | FAT1    | c.8011_8012del(p.F2   | FRAMESHIFT  |
| P72 | TP53    |                       | Deletion    |
| P73 | SMAD4   |                       | Deletion    |
| P73 | APC     | c.1234C>T(p.Q412*)    | STOP GAINED |
| P73 | ETV1    | c.605C>T(p.T202M)     | MISSENSE    |

|     |         |                       |               |
|-----|---------|-----------------------|---------------|
| P73 | RUNX1   | c.731G>A(p.R244K)     | MISSENSE      |
| P73 | APC     |                       | Deletion      |
| P73 | KRAS    | c.436G>A(p.A146T)     | MISSENSE      |
| P73 | TP53    | c.824G>A(p.C275Y)     | MISSENSE      |
| P74 | APC     | c.4348C>T(p.R1450*)   | STOP GAINED   |
| P74 | TP53    | c.286del(p.S96Lfs*27) | FRAMESHIFT    |
| P75 | CDKN2B  | c.302G>A(p.R101Q)     | MISSENSE      |
| P75 | ERCC2   | c.1609G>A(p.A537T)    | MISSENSE      |
| P75 | MSH2    | c.1759+2del           | SPLICE        |
| P75 | EMSY    | c.1474G>A(p.G492S)    | MISSENSE      |
| P75 | RET     | c.2030G>A(p.R677Q)    | MISSENSE      |
| P75 | MED12   | c.2905C>T(p.R969C)    | MISSENSE      |
| P75 | PLK1    | c.1294G>A(p.V432M)    | MISSENSE      |
| P75 | ERCC2   | c.1349G>A(p.R450H)    | MISSENSE      |
| P75 | MEF2B   | c.819del(p.T274Pfs*1) | FRAMESHIFT    |
| P75 | FBXW7   | c.1647del(p.S550Vfs*) | FRAMESHIFT    |
| P75 | PTPN13  | c.3006del(p.K1002Nf)  | FRAMESHIFT    |
| P75 | ATM     | c.5690del(p.F1897Sfs) | FRAMESHIFT    |
| P75 | RECQL4  | c.3139_3141del(p.E11) | INFRAME INDEL |
| P75 | ARID1B  | c.2342C>T(p.A781V)    | MISSENSE      |
| P75 | NOTCH1  | c.5272C>T(p.R1758C)   | MISSENSE      |
| P75 | GNAS    | c.602G>A(p.R201H)     | MISSENSE      |
| P75 | RNF43   | c.349C>A(p.R117S)     | MISSENSE      |
| P75 | MGMT    | c.488C>T(p.A163V)     | MISSENSE      |
| P75 | RNF43   | c.350del(p.R117Pfs*4) | FRAMESHIFT    |
| P75 | LRP1B   | c.9484G>A(p.G3162R)   | MISSENSE      |
| P75 | ERBB3   | c.2999T>C(p.L1000P)   | MISSENSE      |
| P75 | MPL     | c.509G>A(p.R170H)     | MISSENSE      |
| P75 | GNAS    | c.1535G>A(p.R512Q)    | MISSENSE      |
| P75 | CTCF    | c.1697G>A(p.R566H)    | MISSENSE      |
| P75 | DENND1A | c.220G>A(p.V74M)      | MISSENSE      |
| P75 | B2M     | c.285del(p.D96Mfs*7)  | FRAMESHIFT    |
| P75 | MSH2    | c.1609A>T(p.K537*)    | STOP GAINED   |
| P75 | RNF43   | c.394C>T(p.R132*)     | STOP GAINED   |
| P75 | BLM     | c.3530C>T(p.A1177V)   | MISSENSE      |
| P75 | IGF2    | c.298G>A(p.V100M)     | MISSENSE      |
| P75 | AXIN2   | c.2078C>T(p.T693M)    | MISSENSE      |
| P75 | ARID2   | c.3880_3881del(p.L1)  | FRAMESHIFT    |
| P75 | NTRK2   | c.1174T>C(p.Y392H)    | MISSENSE      |
| P75 | PLCB4   | c.3307C>T(p.R1103W)   | MISSENSE      |
| P75 | ARAF    | c.571del(p.R191Afs*1) | FRAMESHIFT    |
| P75 | NOTCH2  | c.5996del(p.N1999M)   | FRAMESHIFT    |
| P75 | AXIN2   | c.1994dup(p.N666Qf)   | FRAMESHIFT    |
| P75 | CDK12   | c.4066C>T(p.R1356*)   | STOP GAINED   |

|     |          |                                    |               |
|-----|----------|------------------------------------|---------------|
| P75 | B2M      | c.346+1dup                         | SPLICE        |
| P75 | TSC1     | c.3130G>A(p.E1044K)                | MISSENSE      |
| P75 | SMARCA4  | c.3727C>T(p.R1243W)                | MISSENSE      |
| P75 | PKHD1    | c.5396T>C(p.L1799P)                | MISSENSE      |
| P75 | SMARCA4  | c.4328G>A(p.R1443H)                | MISSENSE      |
| P75 | TNFRSF11 | c.401C>T(p.A134V)                  | MISSENSE      |
| P75 | FLT3     | c.2128T>A(p.F710I)                 | MISSENSE      |
| P75 | ARID2    | c.1277C>T(p.T426M)                 | MISSENSE      |
| P75 | SETBP1   | c.3961C>T(p.R1321C)                | MISSENSE      |
| P76 | KRAS     | c.35G>T(p.G12V)                    | MISSENSE      |
| P76 | ATM      | c.6679C>T(p.R2227C)                | MISSENSE      |
| P76 | APC      | c.4285C>T(p.Q1429*)                | STOP GAINED   |
| P76 | ATRX     | c.6647A>G(p.D2216G)                | MISSENSE      |
| P76 | APC      | c.2626C>T(p.R876*)                 | STOP GAINED   |
| P76 | MRE11    | c.1618T>G(p.F540V)                 | MISSENSE      |
| P77 | APC      | c.4188del(p.F1396Lfs)              | FRAMESHIFT    |
| P77 | TP53     | c.318C>G(p.S106R)                  | MISSENSE      |
| P77 | PARP1    | c.1076del(p.P359Qfs <sup>3</sup> ) | FRAMESHIFT    |
| P77 | ASCL4    | c.124C>A(p.R42S)                   | MISSENSE      |
| P78 | APC      | c.3929dup(p.I1311Df)               | FRAMESHIFT    |
| P78 | FBXW7    | c.1040G>A(p.R347H)                 | MISSENSE      |
| P78 | FBXW7    | c.1391C>T(p.S464L)                 | MISSENSE      |
| P78 | JARID2   | c.1817G>A(p.R606Q)                 | MISSENSE      |
| P78 | TP53     | c.821_826dup(p.V27 <sup>4</sup> )  | INFRAME INDEL |
| P78 | KRAS     | c.34G>T(p.G12C)                    | MISSENSE      |
| P79 | FBXW7    | c.1040G>A(p.R347H)                 | MISSENSE      |
| P79 | TP53     | c.689C>A(p.T230N)                  | MISSENSE      |
| P79 | ERBB3    | c.179T>G(p.M60R)                   | MISSENSE      |
| P79 | BCR      | c.2842C>G(p.R948G)                 | MISSENSE      |
| P79 | TGFBR2   | c.458dup(p.P154Afs*)               | FRAMESHIFT    |
| P79 | KMT2B    | c.3550G>A(p.V1184M)                | MISSENSE      |
| P79 | NRG1     | c.1136C>G(p.S379*)                 | STOP GAINED   |
| P79 | SOCS1    | c.313G>A(p.D105N)                  | MISSENSE      |
| P79 | TGFBR2   | c.1394A>G(p.E465G)                 | MISSENSE      |
| P79 | ERBB2    | c.929C>T(p.S310F)                  | MISSENSE      |
| P79 | KRAS     | c.35G>A(p.G12D)                    | MISSENSE      |
| P79 | SETD2    | c.4053C>G(p.D1351E)                | MISSENSE      |
| P79 | ROS1     | c.3515A>G(p.N1172S)                | MISSENSE      |
| P79 | CHD4     | c.3314G>A(p.R1105Q)                | MISSENSE      |
| P79 | MED12    | c.47G>A(p.R16Q)                    | MISSENSE      |
| P79 | MTOR     | c.1363G>A(p.V455M)                 | MISSENSE      |
| P79 | TP53     | c.693del(p.I232Sfs*1)              | FRAMESHIFT    |
| P80 | PIK3R1   | c.1946G>A(p.R649Q)                 | MISSENSE      |
| P80 | SGK1     | c.440G>T(p.R147L)                  | MISSENSE      |

|     |        |                      |             |
|-----|--------|----------------------|-------------|
| P80 | FANCE  | c.1088T>C(p.L363P)   | MISSENSE    |
| P80 | AMER1  | c.1072C>T(p.R358*)   | STOP GAINED |
| P80 | LRP1B  | c.4576C>T(p.Q1526*)  | STOP GAINED |
| P80 | ATR    | c.1367T>C(p.M456T)   | MISSENSE    |
| P80 | LRP1B  | c.884G>A(p.R295Q)    | MISSENSE    |
| P80 | ERCC4  | c.2005A>G(p.T669A)   | MISSENSE    |
| P80 | WRN    | c.3143G>T(p.R1048I)  | MISSENSE    |
| P80 | IFNA6  | c.268C>A(p.L90I)     | MISSENSE    |
| P80 | PTCH1  | c.3782A>C(p.N1261T)  | MISSENSE    |
| P80 | STAG2  | c.1841G>A(p.R614Q)   | MISSENSE    |
| P80 | DOT1L  | c.1364C>T(p.S455F)   | MISSENSE    |
| P80 | PTEN   | c.451G>C(p.A151P)    | MISSENSE    |
| P80 | PTCH1  | c.3397A>G(p.T1133A)  | MISSENSE    |
| P80 | POLH   | c.73C>T(p.Q25*)      | STOP GAINED |
| P80 | PREX2  | c.1752A>C(p.K584N)   | MISSENSE    |
| P80 | BRCA1  | c.1982G>T(p.R661M)   | MISSENSE    |
| P80 | DAXX   | c.554G>A(p.R185Q)    | MISSENSE    |
| P80 | FLCN   | c.256C>T(p.R86W)     | MISSENSE    |
| P80 | PIK3C3 | c.349G>A(p.G117R)    | MISSENSE    |
| P80 | PLK1   | c.1498C>T(p.R500C)   | MISSENSE    |
| P80 | IL7R   | c.1181G>A(p.G394D)   | MISSENSE    |
| P80 | PRDM1  | c.223A>G(p.T75A)     | MISSENSE    |
| P80 | MSH6   | c.14G>A(p.S5N)       | MISSENSE    |
| P80 | GRIN2A | c.4127G>A(p.R1376H)  | MISSENSE    |
| P80 | JARID2 | c.1879C>T(p.R627W)   | MISSENSE    |
| P80 | CHD8   | c.5390G>T(p.R1797L)  | MISSENSE    |
| P80 | NF1    | c.3496G>T(p.G1166C)  | MISSENSE    |
| P80 | RECQL4 | c.2507A>G(p.Q836R)   | MISSENSE    |
| P80 | TSHR   | c.1188G>T(p.M396I)   | MISSENSE    |
| P80 | PALB2  | c.1988G>A(p.R663H)   | MISSENSE    |
| P80 | NTRK1  | c.1040G>A(p.R347H)   | MISSENSE    |
| P80 | CUL3   | c.1193delA(p.K398Rf: | FRAMESHIFT  |
| P80 | AXL    | c.874dupC(p.H292Pfs  | FRAMESHIFT  |
| P80 | KMT2B  | c.521dupC(p.T176Dfs  | FRAMESHIFT  |
| P80 | PIK3R1 | c.244dupA(p.I82Nfs*: | FRAMESHIFT  |
| P80 | NOTCH2 | c.3415delC(p.L1139V  | FRAMESHIFT  |
| P80 | TAP2   | c.223delC(p.L75*)    | FRAMESHIFT  |
| P80 | FAT1   | c.12041C>T(p.T4014M) | MISSENSE    |
| P80 | IDH1   | c.293C>T(p.T98I)     | MISSENSE    |
| P80 | TSC2   | c.229G>A(p.A77T)     | MISSENSE    |
| P80 | IFNGR1 | c.1132_1133delAG(p.  | FRAMESHIFT  |
| P80 | PTEN   | c.800delA(p.K267Rfs* | FRAMESHIFT  |
| P80 | BRIP1  | c.3140delT(p.L1047Cf | FRAMESHIFT  |
| P80 | FBXW7  | c.1941delA(p.K647Nf: | FRAMESHIFT  |

|     |          |                      |             |
|-----|----------|----------------------|-------------|
| P80 | PBRM1    | c.773delA(p.N258Mfs  | FRAMESHIFT  |
| P80 | TNFAIP3  | c.1445G>A(p.G482D)   | MISSENSE    |
| P80 | SMARCA4  | c.4303G>A(p.D1435N   | MISSENSE    |
| P80 | IFNGR1   | c.253T>C(p.C85R)     | MISSENSE    |
| P80 | MSH6     | c.3260_3261dupCC(p   | FRAMESHIFT  |
| P80 | CUL3     | c.1358dupA(p.N453K   | FRAMESHIFT  |
| P80 | TAP2     | c.552dupT(p.D185*)   | FRAMESHIFT  |
| P80 | APC      | c.4734T>A(p.C1578*)  | STOP GAINED |
| P80 | TEK      | c.3368C>T(p.A1123V)  | MISSENSE    |
| P80 | KMT2B    | c.5501G>A(p.R1834H   | MISSENSE    |
| P80 | KMT2A    | c.5114C>A(p.P1705H)  | MISSENSE    |
| P80 | CDH1     | c.2515G>A(p.G839S)   | MISSENSE    |
| P80 | TGFBR2   | c.182G>A(p.C61Y)     | MISSENSE    |
| P80 | MUTYH    | c.1063G>A(p.V355M)   | MISSENSE    |
| P80 | KMT2B    | c.4076A>C(p.Q1359P)  | MISSENSE    |
| P80 | TOP2A    | c.3613delA(p.T1205H  | FRAMESHIFT  |
| P80 | MLH3     | c.2021delA(p.N674Ifs | FRAMESHIFT  |
| P80 | QKI      | c.401delA(p.K134Rfs* | FRAMESHIFT  |
| P80 | PREX2    | c.1007delA(p.N336Ifs | FRAMESHIFT  |
| P80 | FLT1     | c.1695_1696delAA(p.  | FRAMESHIFT  |
| P80 | APC      | c.1690C>T(p.R564*)   | STOP GAINED |
| P80 | BAP1     | c.869A>G(p.N290S)    | MISSENSE    |
| P80 | CHD8     | c.2828G>A(p.R943H)   | MISSENSE    |
| P80 | MAP2K1   | c.602G>A(p.R201H)    | MISSENSE    |
| P80 | TP53     | c.848G>A(p.R283H)    | MISSENSE    |
| P80 | SMARCA4  | c.2900G>A(p.R967H)   | MISSENSE    |
| P80 | GATA3    | c.256C>T(p.R86C)     | MISSENSE    |
| P80 | C11orf30 | c.926C>T(p.T309M)    | MISSENSE    |
| P80 | PMS2     | c.947A>G(p.H316R)    | MISSENSE    |
| P80 | FANCM    | c.4005delA(p.V1336L  | FRAMESHIFT  |
| P81 | TP53     | c.743G>A(p.R248Q)    | MISSENSE    |
| P81 | LRP1B    | c.7432T>G(p.L2478V)  | MISSENSE    |
| P81 | QKI      | c.401dupA(p.E135Gfs  | FRAMESHIFT  |
| P81 | KMT2B    | c.5563C>T(p.P1855S)  | MISSENSE    |
| P81 | POLD1    | c.2677G>A(p.D893N)   | MISSENSE    |
| P81 | EIF1AX   | c.38G>A(p.R13H)      | MISSENSE    |
| P81 | EPHA3    | c.236A>G(p.N79S)     | MISSENSE    |
| P81 | NF1      |                      | Deletion    |
| P81 | SMAD4    | c.1082G>A(p.R361H)   | MISSENSE    |
| P81 | BRCA2    | c.4316C>T(p.A1439V)  | MISSENSE    |
| P81 | ARID1A   | c.6763G>A(p.E2255K)  | MISSENSE    |
| P81 | APC      | c.694C>T(p.R232*)    | STOP GAINED |
| P81 | RNF43    | c.198A>T(p.E66D)     | MISSENSE    |
| P82 | KRAS     | c.35G>A(p.G12D)      | MISSENSE    |

|     |        |                      |             |
|-----|--------|----------------------|-------------|
| P82 | PBRM1  | c.3425A>G(p.K1142R)  | MISSENSE    |
| P82 | IDH1   | c.394C>T(p.R132C)    | MISSENSE    |
| P82 | GATA6  | IGR (upstream RBBP8  | FUSION      |
| P82 | MDM2   | c.1026A>C(p.K342N)   | MISSENSE    |
| P82 | NF1    | c.7039A>G(p.S2347G)  | MISSENSE    |
| P82 | TP53   | c.524G>A(p.R175H)    | MISSENSE    |
| P82 | APC    | c.694C>T(p.R232*)    | STOP GAINED |
| P82 | KRAS   | c.35G>T(p.G12V)      | MISSENSE    |
| P82 | PKHD1  | c.5134G>A(p.G1712R)  | MISSENSE    |
| P82 | PMS1   | c.784A>T(p.I262L)    | MISSENSE    |
| P82 | TP53   | c.1024delC(p.R342E)  | FRAMESHIFT  |
| P83 | PTEN   |                      | Deletion    |
| P83 | GRM8   | c.2372G>T(p.C791F)   | MISSENSE    |
| P83 | APC    | c.2821G>T(p.E941*)   | STOP GAINED |
| P83 | TP53   | c.916C>T(p.R306*)    | STOP GAINED |
| P83 | SMO    | c.734C>T(p.T245M)    | MISSENSE    |
| P83 | KRAS   | c.35G>A(p.G12D)      | MISSENSE    |
| P83 | APC    | c.4473delT(p.F1491L) | FRAMESHIFT  |
| P83 | FBXW7  | c.1436G>A(p.R479Q)   | MISSENSE    |
| P83 | CHEK2  | OSBP2:exon1~CHEK2    | FUSION      |
| P83 | EPHA5  | c.832G>A(p.A278T)    | MISSENSE    |
| P83 | APC    | c.4475C>G(p.A1492G)  | MISSENSE    |
| P84 | PALB2  | c.3263C>T(p.P1088L)  | MISSENSE    |
| P84 | AXL    | c.2260C>G(p.R754G)   | MISSENSE    |
| P84 | TP53   | c.487T>C(p.Y163H)    | MISSENSE    |
| P84 | APC    | c.694C>T(p.R232*)    | STOP GAINED |
| P84 | APC    | c.3927_3931delAAAG   | FRAMESHIFT  |
| P84 | KRAS   | c.38G>A(p.G13D)      | MISSENSE    |
| P85 | PLCB4  | c.2246A>G(p.N749S)   | MISSENSE    |
| P85 | POLH   | c.767G>A(p.R256H)    | MISSENSE    |
| P85 | APC    | c.694C>T(p.R232*)    | STOP GAINED |
| P85 | DOT1L  | c.3341C>T(p.A1114V)  | MISSENSE    |
| P85 | PGR    | c.1259G>T(p.G420V)   | MISSENSE    |
| P85 | TP53   | c.746G>T(p.R249M)    | MISSENSE    |
| P86 | TP53   | c.743G>A(p.R248Q)    | MISSENSE    |
| P86 | CHD4   | c.3203G>A(p.R1068H)  | MISSENSE    |
| P86 | FBXW7  | c.1099C>T(p.R367*)   | STOP GAINED |
| P86 | CHD8   | c.5009C>T(p.A1670V)  | MISSENSE    |
| P86 | GRIN2A | c.2984C>T(p.T995M)   | MISSENSE    |
| P86 | BRCA2  | c.2483A>G(p.Y828C)   | MISSENSE    |
| P86 | APC    | c.4132C>T(p.Q1378*)  | STOP GAINED |
| P86 | APC    | c.1431dupA(p.L478I)  | FRAMESHIFT  |
| P87 | NOTCH1 | c.3271G>A(p.G1091S)  | MISSENSE    |
| P87 | TP53   | c.743G>A(p.R248Q)    | MISSENSE    |

|     |        |                      |               |
|-----|--------|----------------------|---------------|
| P87 | KRAS   | c.34G>T(p.G12C)      | MISSENSE      |
| P88 | TP53   | c.817C>T(p.R273C)    | MISSENSE      |
| P89 | APC    | c.4461_4476delTTTA   | FRAMESHIFT    |
| P89 | TP53   | c.524G>A(p.R175H)    | MISSENSE      |
| P89 | TP53   | c.524G>A(p.R175H)    | MISSENSE      |
| P89 | APC    | c.2626C>T(p.R876*)   | STOP GAINED   |
| P89 | NRAS   | c.181C>A(p.Q61K)     | MISSENSE      |
| P90 | ZNF703 |                      | Amplification |
| P90 | PRKDC  | c.3395A>G(p.D1132G)  | MISSENSE      |
| P90 | APC    | c.4189G>T(p.E1397*)  | STOP GAINED   |
| P90 | DPYD   | c.2452_2457dupGCC    | INFRAME INDEL |
| P90 | ERCC5  | c.1016C>A(p.P339H)   | MISSENSE      |
| P90 | TP53   | c.637C>T(p.R213*)    | STOP GAINED   |
| P90 | APC    | c.2626C>T(p.R876*)   | STOP GAINED   |
| P91 | FBXW7  | c.988dupA(p.I330Nfs) | FRAMESHIFT    |
| P91 | SMAD4  | c.346C>T(p.Q116*)    | STOP GAINED   |
| P91 | MTOR   | c.6040G>A(p.E2014K)  | MISSENSE      |
| P91 | TP53   | c.916C>T(p.R306*)    | STOP GAINED   |
| P91 | KRAS   | c.35G>T(p.G12V)      | MISSENSE      |
| P91 | APC    | c.1312+2T>C          | SPLICE        |
| P91 | PARP2  | c.1087A>G(p.R363G)   | MISSENSE      |
| P91 | ATRX   | c.3397G>T(p.E1133*)  | STOP GAINED   |
| P91 | CXCR4  | c.884G>C(p.C295S)    | MISSENSE      |
| P92 | POLE   | c.125A>G(p.D42G)     | MISSENSE      |
| P92 | RAD51D | c.145G>A(p.A49T)     | MISSENSE      |
| P92 | NBN    | c.1397G>A(p.R466K)   | MISSENSE      |
| P92 | RNF43  | c.349C>A(p.R117S)    | MISSENSE      |
| P92 | SF3B1  | c.581C>A(p.S194*)    | STOP GAINED   |
| P92 | POLE   | c.204+2T>C           | SPLICE        |
| P92 | GATA4  | c.1232C>T(p.A411V)   | MISSENSE      |
| P92 | FAT1   | c.13009G>A(p.V4337)  | MISSENSE      |
| P92 | UGT1A1 | c.353dupA(p.D119Gfs) | FRAMESHIFT    |
| P92 | EGFR   | c.3631T>C(p.*1211Rε) | STOP LOST     |
| P92 | MAP2K2 | c.553C>T(p.R185*)    | STOP GAINED   |
| P92 | BRCA2  | c.44T>C(p.F15S)      | MISSENSE      |
| P92 | MAP2K2 | c.1064C>T(p.A355V)   | MISSENSE      |
| P92 | APC    | c.3875C>T(p.T1292M)  | MISSENSE      |
| P92 | ZNF217 | c.2461C>T(p.H821Y)   | MISSENSE      |
| P92 | IDH1   | c.766G>A(p.A256T)    | MISSENSE      |
| P92 | GATA4  | c.776G>A(p.R259H)    | MISSENSE      |
| P92 | RICTOR | c.4610T>C(p.L1537P)  | MISSENSE      |
| P92 | KMT2A  | c.11455C>T(p.R3819C) | MISSENSE      |
| P92 | FANCA  | c.1661C>T(p.A554V)   | MISSENSE      |
| P92 | ERCC1  | c.659C>T(p.A220V)    | MISSENSE      |

|     |         |                                   |
|-----|---------|-----------------------------------|
| P92 | ALK     | c.3707G>A(p.G1236D) MISSENSE      |
| P92 | VHL     | c.613C>T(p.R205C) MISSENSE        |
| P92 | PIK3CA  | c.328_330delGAA(p.E INFRAME INDEL |
| P92 | MYCN    | c.302dupG(p.L102Tfs) FRAMESHIFT   |
| P92 | POLD1   | c.2959delG(p.D987Tf) SPLICE       |
| P92 | GRM3    | c.2314G>T(p.G772C) MISSENSE       |
| P92 | CDKN2B  | c.371G>A(p.G124D) MISSENSE        |
| P92 | KDM5A   | c.3597delA(p.G1200C) FRAMESHIFT   |
| P92 | ARID1A  | c.4555delC(p.Q1519R) FRAMESHIFT   |
| P92 | LZTR1   | c.731C>A(p.S244Y) MISSENSE        |
| P92 | FGFR4   | c.253C>T(p.R85C) MISSENSE         |
| P92 | BRCA1   | c.1016delA(p.K339Rf) FRAMESHIFT   |
| P92 | CHD4    | c.218dupA(p.E74Gfs*) FRAMESHIFT   |
| P92 | FLCN    | c.1285delC(p.H429Tf) FRAMESHIFT   |
| P92 | SPOP    | c.1100delC(p.P367Hf) FRAMESHIFT   |
| P92 | ATM     | c.7174C>T(p.R2392W) MISSENSE      |
| P92 | MTOR    | c.5246G>A(p.R1749Q) MISSENSE      |
| P92 | QKI     | c.401delA(p.K134Rfs*) FRAMESHIFT  |
| P92 | AMER1   | c.1832G>A(p.R611K) MISSENSE       |
| P92 | SMARCB1 | c.641C>T(p.T214M) MISSENSE        |
| P92 | SMARCA4 | c.597C>A(p.H199Q) MISSENSE        |
| P92 | HGF     | c.85G>A(p.A29T) MISSENSE          |
| P92 | DDR2    | c.1552delG(p.V518Cf) FRAMESHIFT   |
| P92 | RAD50   | c.2165dupA(p.E723G) FRAMESHIFT    |
| P92 | NOTCH1  | c.2605G>A(p.D869N) MISSENSE       |
| P92 | PALB2   | c.1249T>C(p.S417P) MISSENSE       |
| P92 | ERBB4   | c.2681A>G(p.Y894C) MISSENSE       |
| P92 | RPTOR   | c.3770C>T(p.T1257M) MISSENSE      |
| P92 | NF1     | c.4247C>A(p.P1416H) MISSENSE      |
| P92 | BARD1   | c.1126T>C(p.S376P) MISSENSE       |
| P92 | NOTCH2  | c.1264G>T(p.A422S) MISSENSE       |
| P92 | PLCB4   | c.2429C>T(p.S810L) MISSENSE       |
| P92 | JARID2  | c.1272delG(p.R425Gf) FRAMESHIFT   |
| P92 | JAK2    | c.1680delT(p.F560Lfs) FRAMESHIFT  |
| P92 | GNAS    | c.794G>A(p.R265H) MISSENSE        |
| P92 | BRCA2   | c.7505G>A(p.R2502H) MISSENSE      |
| P92 | DENND1A | c.1268C>T(p.A423V) MISSENSE       |
| P92 | GRIN2A  | c.3505C>T(p.R1169W) MISSENSE      |
| P92 | CHD8    | c.3338G>A(p.R1113H) MISSENSE      |
| P92 | BRD4    | c.1001A>G(p.D334G) MISSENSE       |
| P92 | EPHA2   | c.719delG(p.G240Vfs) FRAMESHIFT   |
| P92 | SPRED1  | c.234delA(p.D79Tfs*) FRAMESHIFT   |
| P92 | YAP1    | c.147delC(p.A50Pfs*) FRAMESHIFT   |
| P92 | PALB2   | c.3256C>T(p.R1086*) STOP GAINED   |



|     |         |                                    |            |
|-----|---------|------------------------------------|------------|
| P92 | KRAS    | c.35G>A(p.G12D)                    | MISSENSE   |
| P92 | GNAS    | c.1882C>T(p.P628S)                 | MISSENSE   |
| P92 | TNFAIP3 | c.296G>A(p.G99D)                   | MISSENSE   |
| P92 | JAK2    | c.3338G>A(p.R1113H)                | MISSENSE   |
| P92 | RNF43   | c.350delG(p.R117Pfs <sup>1</sup> ) | FRAMESHIFT |
| P92 | TTF1    | c.821delA(p.K274Sfs <sup>*</sup> ) | FRAMESHIFT |
| P92 | PREX2   | c.1693delT(p.S565Rfs)              | FRAMESHIFT |
| P92 | GNAS    | c.767C>T(p.A256V)                  | MISSENSE   |
| P92 | CHD8    | c.7721A>T(p.D2574V)                | MISSENSE   |
| P92 | MYCN    | c.613G>A(p.V205M)                  | MISSENSE   |
| P92 | APC     | c.4715T>A(p.I1572N)                | MISSENSE   |
| P92 | KMT2A   | c.92dupC(p.R32Afs <sup>*1</sup> )  | FRAMESHIFT |
| P92 | BAP1    | c.1259G>A(p.G420E)                 | MISSENSE   |
| P92 | FAT1    | c.11597C>T(p.A3866V)               | MISSENSE   |
| P92 | RUNX1   | c.1319C>T(p.A440V)                 | MISSENSE   |
| P92 | CHD4    | c.5270G>A(p.R1757H)                | MISSENSE   |
| P92 | ERBB3   | c.2000G>A(p.R667H)                 | MISSENSE   |
| P92 | BAX     | c.121delG(p.E41Rfs <sup>*1</sup> ) | FRAMESHIFT |
| P92 | SMO     | c.1202C>T(p.A401V)                 | MISSENSE   |
| P92 | IFNGR1  | c.486T>A(p.D162E)                  | MISSENSE   |
| P92 | FAT1    | c.8799delA(p.G2934V)               | FRAMESHIFT |
| P92 | PARP1   | c.628G>T(p.G210C)                  | MISSENSE   |
| P92 | POT1    | c.260A>G(p.Q87R)                   | MISSENSE   |
| P92 | PGR     | c.1223G>A(p.G408D)                 | MISSENSE   |
| P92 | EXT2    | c.1771T>C(p.S591P)                 | MISSENSE   |
| P92 | BTK     | c.216T>A(p.N72K)                   | MISSENSE   |
| P92 | LRP1B   | c.8528G>A(p.R2843Q)                | MISSENSE   |
| P92 | MSH6    | c.741delA(p.K247Nfs <sup>1</sup> ) | FRAMESHIFT |
| P92 | BLM     | c.2268dupA(p.D757R)                | FRAMESHIFT |
| P92 | SETBP1  | c.440delA(p.N147Ifs <sup>*</sup> ) | FRAMESHIFT |
| P92 | KIT     | c.1015G>A(p.A339T)                 | MISSENSE   |
| P92 | EPHA5   | c.1151G>A(p.G384D)                 | MISSENSE   |
| P92 | RNF43   | c.65dupA(p.A23Gfs <sup>*1</sup> )  | FRAMESHIFT |
| P92 | KMT2A   | c.126delC(p.P45Rfs <sup>*1</sup> ) | FRAMESHIFT |
| P92 | PRKCI   | c.826delA(p.T276Qfs <sup>1</sup> ) | FRAMESHIFT |
| P92 | TSC1    | c.2931dupA(p.L978Tf)               | FRAMESHIFT |
| P92 | EPHA2   | c.1379dupC(p.P461A)                | FRAMESHIFT |
| P92 | PBRM1   | c.4484A>G(p.Q1495R)                | MISSENSE   |
| P92 | FBXW7   | c.1513C>T(p.R505C)                 | MISSENSE   |
| P92 | EP300   | c.1511G>A(p.R504Q)                 | MISSENSE   |
| P92 | KMT2B   | c.5006C>T(p.A1669V)                | MISSENSE   |
| P92 | RICTOR  | c.436G>T(p.A146S)                  | MISSENSE   |
| P92 | ATR     | c.3799G>A(p.V1267I)                | MISSENSE   |
| P92 | NTRK2   | c.2375G>A(p.R792H)                 | MISSENSE   |

|     |        |                      |               |
|-----|--------|----------------------|---------------|
| P92 | NTRK2  | c.1816G>A(p.E606K)   | MISSENSE      |
| P92 | GRM3   | c.755T>C(p.I252T)    | MISSENSE      |
| P92 | FANCI  | c.686T>C(p.V229A)    | MISSENSE      |
| P92 | THADA  | c.5147A>G(p.N1716S)  | MISSENSE      |
| P92 | AKT1   | c.320C>T(p.A107V)    | MISSENSE      |
| P93 | FLT3   |                      | Amplification |
| P93 | KRAS   | c.38G>A(p.G13D)      | MISSENSE      |
| P93 | APC    | c.1147dupG(p.A383G)  | FRAMESHIFT    |
| P93 | FAT1   | c.4653delT(p.N1551K) | FRAMESHIFT    |
| P93 | TP53   | c.335_338dupGCTT(p.  | FRAMESHIFT    |
| P93 | LRP1B  | c.4520A>G(p.Q1507R)  | MISSENSE      |
| P93 | YAP1   | c.229A>G(p.T77A)     | MISSENSE      |
| P93 | PBRM1  | c.4565A>G(p.Q1522R)  | MISSENSE      |
| P93 | APC    | c.2413C>T(p.R805*)   | STOP GAINED   |
| P93 | FLT1   |                      | Amplification |
| P93 | BAI3   | c.3978C>G(p.S1326R)  | MISSENSE      |
| P93 | SMAD4  |                      | Deletion      |
| P93 | APC    | c.4737delT(p.I1580F) | FRAMESHIFT    |
| P94 | ERBB2  | c.2033G>A(p.R678Q)   | MISSENSE      |
| P94 | GNAS   | c.1532G>A(p.R511H)   | MISSENSE      |
| P95 | TP53   | c.586C>T(p.R196*)    | STOP GAINED   |
| P95 | CD274  | c.374G>A(p.R125Q)    | MISSENSE      |
| P95 | AKT1   | c.49G>A(p.E17K)      | MISSENSE      |
| P95 | KRAS   | c.38G>A(p.G13D)      | MISSENSE      |
| P95 | SMAD4  | c.1082G>A(p.R361H)   | MISSENSE      |
| P95 | SETD2  | c.2489A>T(p.E830V)   | MISSENSE      |
| P96 | FANCA  | c.4285G>A(p.D1429N)  | MISSENSE      |
| P96 | PIK3CA | c.1345C>A(p.P449T)   | MISSENSE      |
| P96 | EPHA3  | c.1895T>G(p.F632C)   | MISSENSE      |
| P96 | TP53   | c.770T>G(p.L257R)    | MISSENSE      |
| P96 | KRAS   | c.35G>A(p.G12D)      | MISSENSE      |
| P96 | APC    | c.1234C>T(p.Q412*)   | STOP GAINED   |
| P96 | ERBB3  | c.3701C>T(p.S1234F)  | MISSENSE      |
| P96 | KMT2C  | c.2742T>A(p.S914R)   | MISSENSE      |
| P97 | CTNNB1 | c.770C>T(p.T257I)    | MISSENSE      |
| P97 | SMAD4  | c.1521A>T(p.K507N)   | MISSENSE      |
| P97 | PKHD1  | c.8011C>T(p.R2671*)  | STOP GAINED   |
| P97 | STAT3  | c.2147C>T(p.T716M)   | MISSENSE      |
| P97 | KRAS   | c.35G>A(p.G12D)      | MISSENSE      |
| P97 | NRAS   | c.35G>A(p.G12D)      | MISSENSE      |
| P98 | TP53   | c.817C>T(p.R273C)    | MISSENSE      |
| P98 | PREX2  | c.3245G>A(p.S1082N)  | MISSENSE      |
| P98 | RNF43  | c.1A>T(p.M1?)        | START LOST    |
| P98 | LZTR1  | c.27dupG(p.Q10Afs*)  | FRAMESHIFT    |

|     |         |                                  |             |
|-----|---------|----------------------------------|-------------|
| P98 | ESR1    | c.296C>T(p.P99L)                 | MISSENSE    |
| P98 | NF1     | c.130_131dupAT(p.N               | FRAMESHIFT  |
| P99 | KMT2C   | c.1149G>A(p.W383*)               | STOP GAINED |
| P99 | KRAS    | c.40G>A(p.V14I)                  | MISSENSE    |
| P99 | B2M     | c.43_44delCT(p.L15Ff             | FRAMESHIFT  |
| P99 | TNFAIP3 | c.365T>C(p.L122P)                | MISSENSE    |
| P99 | PTEN    | c.700C>T(p.R234W)                | MISSENSE    |
| P99 | ERCC5   | c.1372G>A(p.V458I)               | MISSENSE    |
| P99 | FAT1    | c.9683delC(p.P3228Ll             | FRAMESHIFT  |
| P99 | CTNNB1  | c.134C>T(p.S45F)                 | MISSENSE    |
| P99 | PTCH1   | c.3490G>A(p.V1164I)              | MISSENSE    |
| P99 | GRIN2A  | c.2840G>T(p.R947M)               | MISSENSE    |
| P99 | LZTR1   | c.17G>A(p.S6N)                   | MISSENSE    |
| P99 | POLE    | c.5024G>A(p.R1675H)              | MISSENSE    |
| P99 | PARK2   | c.621A>T(p.E207D)                | MISSENSE    |
| P99 | ARID1A  | c.4030dupT(p.S1344F              | FRAMESHIFT  |
| P99 | FLT1    | c.2144C>T(p.T715M)               | MISSENSE    |
| P99 | PLK1    | c.661G>A(p.E221K)                | MISSENSE    |
| P99 | CYLD    | c.115C>A(p.L39I)                 | MISSENSE    |
| P99 | MTOR    | c.406G>A(p.A136T)                | MISSENSE    |
| P99 | NOTCH2  | c.6862C>T(p.P2288S)              | MISSENSE    |
| P99 | RET     | c.2789C>T(p.T930M)               | MISSENSE    |
| P99 | CDKN2A  | c.386A>G(p.Y129C)                | MISSENSE    |
| P99 | CREBBP  | c.7150delC(p.H2384T              | FRAMESHIFT  |
| P99 | CHD8    | c.7112dupA(p.N2371               | FRAMESHIFT  |
| P99 | ARID1B  | c.4913G>A(p.R1638H)              | MISSENSE    |
| P99 | QKI     | c.401delA(p.K134Rfs <sup>1</sup> | FRAMESHIFT  |
| P99 | BRD4    | c.2006G>A(p.R669H)               | MISSENSE    |
| P99 | NOTCH1  | c.3511-1G>A                      | SPLICE      |
| P99 | IKBKE   | c.560G>A(p.R187Q)                | MISSENSE    |
| P99 | TSHR    | c.50G>T(p.R17M)                  | MISSENSE    |
| P99 | CTCF    | c.610dupA(p.T204Nfs              | FRAMESHIFT  |
| P99 | LRP1B   | c.7834delC(p.Q2612R              | FRAMESHIFT  |
| P99 | ERBB2   | c.3017G>A(p.R1006H)              | MISSENSE    |
| P99 | MLLT4   | c.164_165delTT(p.F5!             | FRAMESHIFT  |
| P99 | BLM     | c.1544delA(p.N515M)              | FRAMESHIFT  |
| P99 | RAD50   | c.2801delA(p.N934lfs             | FRAMESHIFT  |
| P99 | FAT1    | c.5854G>A(p.V1952I)              | MISSENSE    |
| P99 | MLH1    | c.1331dupA(p.N444K)              | FRAMESHIFT  |
| P99 | ERBB2   | c.877G>A(p.A293T)                | MISSENSE    |
| P99 | GATA4   | c.572G>T(p.S191I)                | MISSENSE    |
| P99 | MTOR    | c.5819C>G(p.P1940R)              | MISSENSE    |
| P99 | BRCA2   | c.5200G>A(p.E1734K)              | MISSENSE    |
| P99 | PIK3CA  | c.323G>A(p.R108H)                | MISSENSE    |

|      |         |                       |               |
|------|---------|-----------------------|---------------|
| P99  | BAP1    | c.1702G>T(p.G568W)    | MISSENSE      |
| P99  | CYSLTR2 | c.442C>T(p.H148Y)     | MISSENSE      |
| P99  | FLCN    | c.1285delC(p.H429Tf:  | FRAMESHIFT    |
| P99  | PARK2   | c.1310C>T(p.P437L)    | MISSENSE      |
| P99  | PKHD1   | c.10487T>C(p.L3496S   | MISSENSE      |
| P99  | ARID1A  | c.736G>A(p.A246T)     | MISSENSE      |
| P99  | KRAS    | c.38G>A(p.G13D)       | MISSENSE      |
| P99  | ARID1B  | c.4169A>G(p.D1390G    | MISSENSE      |
| P99  | AXL     | c.874dupC(p.H292Pfs   | FRAMESHIFT    |
| P99  | FLT3    | c.106G>A(p.V36I)      | MISSENSE      |
| P99  | B2M     | c.45_48delTTCT(p.S1f  | FRAMESHIFT    |
| P99  | RNF43   | c.1976delG(p.G659Vf   | FRAMESHIFT    |
| P99  | RNF43   | c.902C>A(p.P301H)     | MISSENSE      |
| P99  | ARID2   | c.2119G>A(p.A707T)    | MISSENSE      |
| P99  | PIK3R1  | c.244delA(p.I82Sfs*3: | FRAMESHIFT    |
| P99  | AXL     | c.195dupC(p.E66Rfs*   | FRAMESHIFT    |
| P100 | APC     | c.4147dupA(p.M1383    | FRAMESHIFT    |
| P100 | CYLD    | c.2758C>G(p.L920V)    | MISSENSE      |
| P100 | LRP1B   | c.10912C>T(p.R3638\   | MISSENSE      |
| P100 | TP53    | c.404G>A(p.C135Y)     | MISSENSE      |
| P100 | APC     | c.532-1G>C            | SPLICE        |
| P101 | CDKN1C  | c.190G>T(p.D64Y)      | MISSENSE      |
| P101 | PIK3CA  |                       | Amplification |
| P101 | EGFR    | c.2303G>A(p.S768N)    | MISSENSE      |
| P101 | NFE2L2  | c.235G>C(p.E79Q)      | MISSENSE      |
| P101 | AR      | c.277G>A(p.E93K)      | MISSENSE      |
| P102 | KRAS    | c.35G>A(p.G12D)       | MISSENSE      |
| P102 | TP53    | c.733G>A(p.G245S)     | MISSENSE      |
| P102 | APC     | c.3919delA(p.I1307*)  | FRAMESHIFT    |
| P102 | ERBB3   | c.1064C>T(p.T355I)    | MISSENSE      |
| P102 | APC     | c.3940_3943dupAGG     | FRAMESHIFT    |
| P102 | FBXW7   | c.931T>C(p.W311R)     | MISSENSE      |
| P102 | FANCD2  | c.3095A>G(p.N1032S    | MISSENSE      |
| P103 | TP53    | c.742C>T(p.R248W)     | MISSENSE      |
| P103 | APC     | c.4198delT(p.S1400Rf  | FRAMESHIFT    |
| P103 | ERCC5   | c.1951G>A(p.D651N)    | MISSENSE      |
| P103 | PTK2    |                       | Amplification |
| P103 | MYC     |                       | Amplification |
| P103 | EWSR1   | c.1279G>A(p.V427M)    | MISSENSE      |
| P103 | PLCB4   | c.2890A>G(p.I964V)    | MISSENSE      |
| P103 | KRAS    | c.35G>A(p.G12D)       | MISSENSE      |
| P104 | TOP1    |                       | Amplification |
| P104 | FLT4    | c.1309C>T(p.R437C)    | MISSENSE      |
| P104 | FLT1    | c.2603C>T(p.T868M)    | MISSENSE      |

|      |        |                      |               |
|------|--------|----------------------|---------------|
| P104 | ZNF217 |                      | Amplification |
| P104 | GNAS   |                      | Amplification |
| P104 | TP53   | c.129delGinsAA(p.M4  | FRAMESHIFT    |
| P104 | APC    | c.1861dupA(p.T621N   | FRAMESHIFT    |
| P104 | SRC    |                      | Amplification |
| P104 | FGFR1  |                      | Amplification |
| P104 | CTNNB1 | c.1522A>C(p.K508Q)   | MISSENSE      |
| P105 | TP53   | c.216dupC(p.V73Rfs*  | FRAMESHIFT    |
| P105 | ZNF217 |                      | Amplification |
| P105 | APC    | c.646C>T(p.R216*)    | STOP GAINED   |
| P105 | TOP1   |                      | Amplification |
| P105 | GNAS   |                      | Amplification |
| P105 | TOP1   |                      | Amplification |
| P105 | ZNF217 |                      | Amplification |
| P105 | GNAS   |                      | Amplification |
| P106 | FGFR1  |                      | Amplification |
| P106 | AR     | c.1615C>T(p.R539C)   | MISSENSE      |
| P106 | APC    | c.4666dupA(p.T1556I  | FRAMESHIFT    |
| P106 | ARID1A | c.2988+1G>A          | SPLICE        |
| P106 | ESR1   | c.146C>T(p.P49L)     | MISSENSE      |
| P106 | ESR1   | c.1507C>T(p.R503W)   | MISSENSE      |
| P106 | KRAS   | c.34G>T(p.G12C)      | MISSENSE      |
| P106 | TP53   | c.743G>A(p.R248Q)    | MISSENSE      |
| P107 | EGFR   | EGFR:exon4~VOPP1:ε   | FUSION        |
| P107 | SMAD4  | c.1577A>T(p.E526V)   | MISSENSE      |
| P107 | FLT4   | c.2630C>A(p.A877D)   | MISSENSE      |
| P107 | EGFR   |                      | Amplification |
| P107 | ATM    | c.3019G>A(p.D1007N   | MISSENSE      |
| P107 | EGFR   | EGFR:exon25~SEPT14   | FUSION        |
| P107 | APC    | c.4037C>A(p.S1346*)  | STOP GAINED   |
| P107 | APC    | c.3842C>A(p.S1281*)  | STOP GAINED   |
| P107 | ATRX   | c.5566+1G>T          | SPLICE        |
| P107 | TP53   | c.733G>A(p.G245S)    | MISSENSE      |
| P107 | EGFR   |                      | Amplification |
| P108 | AMER1  | c.1921C>T(p.R641*)   | STOP GAINED   |
| P108 | INPP4B | c.1704T>G(p.I568M)   | MISSENSE      |
| P108 | SMAD2  | c.1387delT(p.C463Afs | FRAMESHIFT    |
| P108 | SMAD2  | c.1279C>T(p.R427*)   | STOP GAINED   |
| P108 | KRAS   | c.35G>T(p.G12V)      | MISSENSE      |
| P108 | SMAD3  | c.1102C>T(p.R368*)   | STOP GAINED   |
| P108 | APC    | c.4348C>T(p.R1450*)  | STOP GAINED   |
| P108 | APC    | c.1548+1G>A          | SPLICE        |
| P108 | PAK3   | c.611G>A(p.R204H)    | MISSENSE      |
| P109 | CTNNB1 | c.199G>A(p.E67K)     | MISSENSE      |

|      |          |                      |               |
|------|----------|----------------------|---------------|
| P109 | TP53     | c.733G>A(p.G245S)    | MISSENSE      |
| P109 | NRAS     | c.181C>A(p.Q61K)     | MISSENSE      |
| P109 | APC      | c.1495C>T(p.R499*)   | STOP GAINED   |
| P109 | ALK      | c.2144G>A(p.G715E)   | MISSENSE      |
| P109 | FLCN     | c.1429C>T(p.R477*)   | STOP GAINED   |
| P109 | APC      | c.688_692delCGTAT(   | FRAMESHIFT    |
| P110 | KRAS     | c.37G>C(p.G13R)      | MISSENSE      |
| P110 | RAD50    | FSD1L:exon1~RAD50:   | FUSION        |
| P110 | C11orf30 | c.3130G>C(p.V1044L)  | MISSENSE      |
| P110 | PIK3CA   | c.1634A>G(p.E545G)   | MISSENSE      |
| P110 | APC      | c.4473dupT(p.A1492(  | FRAMESHIFT    |
| P110 | TP53     | c.380C>T(p.S127F)    | MISSENSE      |
| P110 | APC      | c.2475T>A(p.Y825*)   | STOP GAINED   |
| P110 | FGFR3    |                      | Amplification |
| P111 | XPC      | c.991-2A>T           | SPLICE        |
| P111 | POLE     | c.5648C>T(p.A1883V)  | MISSENSE      |
| P111 | CDK12    | c.2336G>A(p.R779H)   | MISSENSE      |
| P111 | PREX2    | c.1835A>G(p.K612R)   | MISSENSE      |
| P111 | EPHA3    | c.2849A>G(p.D950G)   | MISSENSE      |
| P111 | ARAF     | c.563G>A(p.R188H)    | MISSENSE      |
| P111 | RPTOR    | c.1336C>T(p.R446W)   | MISSENSE      |
| P111 | KRAS     | c.38G>A(p.G13D)      | MISSENSE      |
| P111 | PGR      | c.2404T>G(p.W802G)   | MISSENSE      |
| P111 | PRSS1    | c.134A>C(p.Y45S)     | MISSENSE      |
| P111 | CTCF     | c.134C>T(p.T45M)     | MISSENSE      |
| P111 | MED12    | c.2770C>A(p.L924M)   | MISSENSE      |
| P111 | AIP      | c.332G>A(p.G111D)    | MISSENSE      |
| P111 | BRCA2    | c.1813dupA(p.I605Nf  | FRAMESHIFT    |
| P111 | KMT2A    | c.2318delC(p.P773Rfs | FRAMESHIFT    |
| P111 | PBRM1    | c.1600C>T(p.R534*)   | STOP GAINED   |
| P111 | RB1      | c.137+1G>A           | SPLICE        |
| P111 | AMER1    | c.2908C>T(p.P970S)   | MISSENSE      |
| P111 | FANCC    | c.1082G>A(p.R361Q)   | MISSENSE      |
| P111 | TSC2     | c.4727C>T(p.T1576M)  | MISSENSE      |
| P111 | KMT2B    | c.8132G>A(p.R2711H)  | MISSENSE      |
| P111 | FBXW7    | c.2065C>T(p.R689W)   | MISSENSE      |
| P111 | GRIN2A   | c.1510C>T(p.R504W)   | MISSENSE      |
| P111 | APC      | c.7811A>C(p.N2604T)  | MISSENSE      |
| P111 | NOTCH1   | c.4249C>A(p.P1417T)  | MISSENSE      |
| P111 | GRIN2A   | c.3238C>T(p.H1080Y)  | MISSENSE      |
| P111 | MSH6     | c.3261delC(p.F1088Sf | FRAMESHIFT    |
| P111 | KMT2A    | c.6190C>T(p.R2064C)  | MISSENSE      |
| P111 | PTCH1    | c.1274C>T(p.T425M)   | MISSENSE      |
| P111 | NKX2-1   | c.90G>T(p.E30D)      | MISSENSE      |

|      |        |                       |               |
|------|--------|-----------------------|---------------|
| P111 | PKHD1  | c.8141G>A(p.R2714Q)   | MISSENSE      |
| P111 | EPHA2  | c.524G>A(p.R175H)     | MISSENSE      |
| P111 | ALK    | c.83G>A(p.R28H)       | MISSENSE      |
| P111 | AMER1  | c.1801C>T(p.R601*)    | STOP GAINED   |
| P111 | GNAS   | c.139G>A(p.E47K)      | MISSENSE      |
| P111 | FOXP1  | c.1154T>A(p.L385Q)    | MISSENSE      |
| P111 | BRD4   | c.137delC(p.P46Rfs*4) | FRAMESHIFT    |
| P111 | IGF2   | c.518dupC(p.E174Rfs)  | FRAMESHIFT    |
| P111 | ZNF703 | c.61G>A(p.G21S)       | MISSENSE      |
| P111 | GRM8   | c.959A>G(p.Q320R)     | MISSENSE      |
| P111 | LRP1B  | c.9325A>G(p.R3109G)   | MISSENSE      |
| P111 | CASP8  | c.1288C>T(p.R430*)    | STOP GAINED   |
| P111 | GRM3   | c.1079A>G(p.Q360R)    | MISSENSE      |
| P111 | FANCA  | c.4303G>A(p.A1435T)   | MISSENSE      |
| P111 | GRM3   | c.1241A>G(p.N414S)    | MISSENSE      |
| P111 | RECQL4 | c.385C>T(p.P129S)     | MISSENSE      |
| P111 | FOXP1  | c.1540C>T(p.R514C)    | MISSENSE      |
| P111 | ERBB4  | c.946G>A(p.E316K)     | MISSENSE      |
| P111 | ATM    | c.1661C>T(p.T554M)    | MISSENSE      |
| P111 | BAP1   | c.862G>A(p.A288T)     | MISSENSE      |
| P111 | DOT1L  | c.3158C>T(p.A1053V)   | MISSENSE      |
| P111 | APC    | c.4438C>T(p.Q1480*)   | STOP GAINED   |
| P111 | NSD1   | c.7697C>T(p.T2566I)   | MISSENSE      |
| P111 | CDK12  | c.4177G>T(p.G1393V)   | MISSENSE      |
| P111 | PLK1   | c.1711G>A(p.G571S)    | MISSENSE      |
| P111 | FAT1   | c.9683dupC(p.V3229)   | FRAMESHIFT    |
| P111 | APC    | c.694C>T(p.R232*)     | STOP GAINED   |
| P111 | PTPN13 | c.3069-2A>G           | SPLICE        |
| P111 | KDM5A  | c.4234G>T(p.G1412C)   | MISSENSE      |
| P111 | TERT   | c.2776G>A(p.G926S)    | MISSENSE      |
| P111 | LRP1B  | c.1675C>T(p.R559C)    | MISSENSE      |
| P111 | PKHD1  | c.3385G>A(p.G1129R)   | MISSENSE      |
| P111 | CYP2D6 | c.508C>T(p.R170C)     | MISSENSE      |
| P111 | KLLN   | c.238A>C(p.S80R)      | MISSENSE      |
| P111 | DNMT3A | c.2149A>G(p.N717D)    | MISSENSE      |
| P111 | JAK1   | c.2580delA(p.K860Nf)  | FRAMESHIFT    |
| P111 | RNF43  | c.1976delG(p.G659Vf)  | FRAMESHIFT    |
| P112 | DDR2   | c.778C>T(p.R260W)     | MISSENSE      |
| P112 | KRAS   | c.351A>C(p.K117N)     | MISSENSE      |
| P112 | FLT4   | c.1002C>G(p.S334R)    | MISSENSE      |
| P112 | FLT3   |                       | Amplification |
| P112 | MYC    |                       | Amplification |
| P112 | PIK3CA | c.1633G>A(p.E545K)    | MISSENSE      |
| P112 | FLT1   |                       | Amplification |

|      |         |                      |               |
|------|---------|----------------------|---------------|
| P112 | SMARCA4 | c.3728G>A(p.R1243Q)  | MISSENSE      |
| P112 | CDC73   | c.1480G>A(p.V494I)   | MISSENSE      |
| P112 | ARID1A  | c.1650dupC(p.Y551L)  | FRAMESHIFT    |
| P113 | TP53    | c.844C>T(p.R282W)    | MISSENSE      |
| P113 | PIK3CA  | c.328_330delGAA(p.E) | INFRAME INDEL |
| P113 | KRAS    | c.35G>T(p.G12V)      | MISSENSE      |
| P113 | APC     | c.1847delT(p.L616W)  | FRAMESHIFT    |
| P113 | APC     | c.4241delT(p.V1414E) | FRAMESHIFT    |
| P114 | APC     | c.2626C>T(p.R876*)   | STOP GAINED   |
| P114 | PIK3CA  | c.353G>A(p.G118D)    | MISSENSE      |
| P114 | APC     | c.4666dupA(p.T1556I) | FRAMESHIFT    |
| P114 | AMER1   | c.1150G>T(p.E384*)   | STOP GAINED   |
| P114 | PPP2R1A | c.1051G>A(p.G351S)   | MISSENSE      |
| P114 | PRF1    | c.1648C>T(p.R550W)   | MISSENSE      |
| P114 | TP53    | c.659A>G(p.Y220C)    | MISSENSE      |
| P114 | LZTR1   | c.1260+2_1260+8del   | SPLICE        |
| P114 | KRAS    | c.35G>A(p.G12D)      | MISSENSE      |
| P115 | KRAS    | c.35G>A(p.G12D)      | MISSENSE      |
| P115 | APC     | c.646C>T(p.R216*)    | STOP GAINED   |
| P115 | ARID1A  | c.1020_1031delGGCC   | INFRAME INDEL |
| P115 | CASP8   | c.1252C>G(p.L418V)   | MISSENSE      |
| P115 | SMAD4   | c.1082G>A(p.R361H)   | MISSENSE      |
| P115 | FBXW7   | c.832C>T(p.R278*)    | STOP GAINED   |
| P115 | ARID2   | c.5371_5372delAA(p.  | FRAMESHIFT    |
| P115 | PRKCI   | c.1438C>T(p.R480C)   | MISSENSE      |
| P115 | MED12   | c.4036C>T(p.R1346C)  | MISSENSE      |
| P115 | APC     | c.3927_3931delAAAG   | FRAMESHIFT    |
| P116 | AXL     | c.502C>G(p.P168A)    | MISSENSE      |
| P116 | BRD4    | c.3197T>G(p.L1066R)  | MISSENSE      |
| P116 | BMPR1A  | c.905G>T(p.W302L)    | MISSENSE      |
| P116 | PRF1    | c.1537A>C(p.N513H)   | MISSENSE      |
| P116 | FANCM   | IGR (downstream RPL) | FUSION        |
| P116 | APC     | c.2815A>T(p.K939*)   | STOP GAINED   |
| P116 | PLCB4   | c.1629_1630invAG(p.  | MISSENSE      |
| P116 | SDHB    | c.807G>C(p.M269I)    | MISSENSE      |
| P116 | KRAS    | c.35G>T(p.G12V)      | MISSENSE      |
| P116 | XPC     | c.1425delG(p.T476Q)  | FRAMESHIFT    |
| P116 | APC     | c.4285C>T(p.Q1429*)  | STOP GAINED   |
| P116 | TERT    | c.-124C>T            | MISSENSE      |
| P116 | AR      | c.1025C>T(p.P342L)   | MISSENSE      |
| P116 | AR      | c.2290T>A(p.Y764N)   | MISSENSE      |
| P116 | AR      | c.2272G>A(p.V758I)   | MISSENSE      |
| P117 | NF1     | c.2001+2T>C          | SPLICE        |
| P117 | TP53    | c.492G>T(p.K164N)    | MISSENSE      |



|      |        |                                    |             |
|------|--------|------------------------------------|-------------|
| P117 | PKD1   | c.1292C>T(p.T431M)                 | MISSENSE    |
| P117 | PBRM1  | c.1847A>C(p.K616T)                 | MISSENSE    |
| P117 | CHD8   | c.4457T>C(p.I1486T)                | MISSENSE    |
| P117 | ERCC4  | c.2215G>A(p.G739S)                 | MISSENSE    |
| P117 | TEK    | c.2232delG(p.K745Rf)               | FRAMESHIFT  |
| P117 | NQO1   | c.746delA(p.N249Tfs <sup>3</sup> ) | FRAMESHIFT  |
| P117 | CASP8  | c.1337T>C(p.L446P)                 | MISSENSE    |
| P117 | POLE   | c.1676G>A(p.R559Q)                 | MISSENSE    |
| P117 | PDGFRA | c.493G>T(p.E165*)                  | STOP GAINED |
| P117 | KMT2B  | c.7921G>A(p.A2641T)                | MISSENSE    |
| P117 | DPYD   | c.893C>T(p.T298M)                  | MISSENSE    |
| P117 | PTPN13 | c.4160A>G(p.D1387G)                | MISSENSE    |
| P117 | MTOR   | c.6725A>G(p.H2242R)                | MISSENSE    |
| P117 | FANCA  | c.926G>A(p.S309N)                  | MISSENSE    |
| P117 | CYP2C9 | c.1003C>T(p.R335W)                 | MISSENSE    |
| P117 | CBLB   | c.1787G>T(p.R596L)                 | MISSENSE    |
| P117 | EXT2   | c.28C>T(p.R10W)                    | MISSENSE    |
| P117 | TET2   | c.3770C>T(p.T1257M)                | MISSENSE    |
| P117 | POLE   | c.6842A>G(p.N2281S)                | MISSENSE    |
| P117 | MLH3   | c.1755dupA(p.E586Rf)               | FRAMESHIFT  |
| P117 | EXT1   | c.369delA(p.E125Rfs <sup>*</sup> ) | FRAMESHIFT  |
| P117 | GATA6  | c.1087C>T(p.Q363*)                 | STOP GAINED |
| P117 | ASXL1  | c.1085+1G>A                        | SPLICE      |
| P117 | IGF1R  | c.419C>T(p.A140V)                  | MISSENSE    |
| P117 | RAC3   | c.73A>G(p.T25A)                    | MISSENSE    |
| P117 | NOTCH2 | c.1499G>T(p.S500I)                 | MISSENSE    |
| P117 | ZNF703 | c.1316G>A(p.G439D)                 | MISSENSE    |
| P117 | RET    | c.2657G>A(p.R886Q)                 | MISSENSE    |
| P117 | AMER1  | c.519delT(p.F173Lfs <sup>*</sup> ) | FRAMESHIFT  |
| P117 | MLH3   | c.1755delA(p.E586Nf)               | FRAMESHIFT  |
| P117 | IGF1R  | c.1636T>C(p.S546P)                 | MISSENSE    |
| P117 | TSC2   | c.2416G>A(p.V806M)                 | MISSENSE    |
| P117 | TP53   | c.817C>T(p.R273C)                  | MISSENSE    |
| P117 | SGK1   | c.1148G>A(p.R383Q)                 | MISSENSE    |
| P117 | NOTCH3 | c.4999C>T(p.R1667C)                | MISSENSE    |
| P117 | FAT1   | c.4355A>G(p.H1452R)                | MISSENSE    |
| P117 | CXCR4  | c.739G>A(p.A247T)                  | MISSENSE    |
| P117 | BRCA2  | c.9097delA(p.T3033Ll)              | FRAMESHIFT  |
| P117 | AXL    | c.1010delC(p.P337Lfs)              | FRAMESHIFT  |
| P117 | CREBBP | c.1270C>T(p.R424*)                 | STOP GAINED |
| P117 | ESR1   | c.425G>A(p.R142H)                  | MISSENSE    |
| P117 | CDKN1C | c.91C>A(p.R31S)                    | MISSENSE    |
| P117 | GRM8   | c.2309C>T(p.T770M)                 | MISSENSE    |
| P117 | NOTCH2 | c.1259C>T(p.A420V)                 | MISSENSE    |

|      |         |                      |               |
|------|---------|----------------------|---------------|
| P117 | PTK2    | c.2825C>T(p.T942M)   | MISSENSE      |
| P117 | PKHD1   | c.10388T>C(p.L3463S) | MISSENSE      |
| P117 | MDM4    | c.535G>A(p.A179T)    | MISSENSE      |
| P117 | RECQL4  | c.3011C>T(p.A1004V)  | MISSENSE      |
| P117 | POLE    | c.100C>T(p.R34C)     | MISSENSE      |
| P117 | MSH2    | c.2605G>A(p.A869T)   | MISSENSE      |
| P117 | TP53    | c.604C>T(p.R202C)    | MISSENSE      |
| P117 | ALK     | c.3178C>T(p.R1060C)  | MISSENSE      |
| P117 | MSH6    | c.718C>T(p.R240*)    | STOP GAINED   |
| P117 | ARID1B  | c.3890C>T(p.T1297M)  | MISSENSE      |
| P117 | TOP2A   | c.4303A>G(p.R1435G)  | MISSENSE      |
| P117 | THADA   | c.1783G>T(p.G595*)   | STOP GAINED   |
| P117 | PTEN    | c.253+2T>C           | SPLICE        |
| P117 | NOTCH1  | c.7327G>A(p.V2443M)  | MISSENSE      |
| P117 | DOT1L   | c.146C>T(p.P49L)     | MISSENSE      |
| P117 | EGFR    | c.2320G>A(p.V774M)   | MISSENSE      |
| P117 | GATA3   | c.379C>T(p.P127S)    | MISSENSE      |
| P117 | FLT4    | c.3208C>T(p.R1070C)  | MISSENSE      |
| P117 | PDE11A  | c.475C>T(p.R159W)    | MISSENSE      |
| P117 | TET2    | c.4351C>T(p.R1451W)  | MISSENSE      |
| P117 | PPP2R1A | c.548G>A(p.R183Q)    | MISSENSE      |
| P117 | FLT1    | c.406G>A(p.V136I)    | MISSENSE      |
| P117 | FANCA   | c.3788_3790delTCT(p  | INFRAME INDEL |
| P117 | LRP1B   | c.12869A>C(p.E4290/  | MISSENSE      |
| P117 | DENND1A | c.2969C>T(p.A990V)   | MISSENSE      |
| P117 | CTNNB1  | c.1000G>A(p.E334K)   | MISSENSE      |
| P117 | ARID2   | c.940C>T(p.R314C)    | MISSENSE      |
| P117 | KMT2B   | c.4357A>G(p.S1453G)  | MISSENSE      |
| P117 | EPAS1   | c.610A>G(p.N204D)    | MISSENSE      |
| P117 | AXIN2   | c.1883G>T(p.R628L)   | MISSENSE      |
| P117 | TTF1    | c.836dupA(p.K280Efs) | FRAMESHIFT    |
| P117 | TGFBR2  | c.382_383delAA(p.K1  | FRAMESHIFT    |
| P117 | PMS1    | c.418+2T>C           | SPLICE        |
| P117 | ALK     | c.1918G>A(p.G640R)   | MISSENSE      |
| P117 | SUFU    | c.1274C>T(p.A425V)   | MISSENSE      |
| P117 | SPRY4   | c.815T>A(p.L272H)    | MISSENSE      |
| P117 | STAG2   | c.1642C>T(p.L548F)   | MISSENSE      |
| P117 | POLD1   | c.2096C>T(p.S699F)   | MISSENSE      |
| P117 | NOTCH3  | c.5006G>A(p.R1669H)  | MISSENSE      |
| P117 | PTCH1   | c.3606dupC(p.S1203C  | FRAMESHIFT    |
| P117 | APC     | c.4348C>T(p.R1450*)  | STOP GAINED   |
| P117 | FBXW7   | c.1094G>A(p.W365*)   | STOP GAINED   |
| P117 | ERCC4   | c.289C>T(p.R97C)     | MISSENSE      |
| P117 | LRP1B   | c.2803G>A(p.G935R)   | MISSENSE      |

|      |         |                       |                  |
|------|---------|-----------------------|------------------|
| P117 | EPHA2   | c.1703G>A(p.R568H)    | MISSENSE         |
| P117 | FLT3    | c.1349C>T(p.A450V)    | MISSENSE         |
| P117 | ALK     | c.4522G>A(p.G1508S)   | MISSENSE         |
| P117 | FGF19   | c.452G>A(p.R151Q)     | MISSENSE         |
| P117 | DOT1L   | c.2680G>A(p.A894T)    | MISSENSE         |
| P117 | SDHA    | c.1771G>A(p.A591T)    | MISSENSE         |
| P117 | CCND1   | c.842T>C(p.V281A)     | MISSENSE         |
| P117 | BAX     | c.121delG(p.E41Rfs)*1 | FRAMESHIFT       |
| P118 | SMAD4   | c.1610A>G(p.D537G)    | MISSENSE         |
| P118 | APC     | c.3146G>A(p.W1049*)   | STOP GAINED      |
| P118 | PIK3CA  | c.3140A>G(p.H1047R)   | MISSENSE         |
| P118 | VEGFA   | c.641G>A(p.G214E)     | MISSENSE         |
| P118 | TP53    | c.742C>T(p.R248W)     | MISSENSE         |
| P118 | KRAS    | c.35G>A(p.G12D)       | MISSENSE         |
| P118 | APC     | c.4260_4261delCA(p.   | FRAMESHIFT       |
| P118 | TUBB3   | c.904G>A(p.A302T)     | MISSENSE         |
| P118 | FLT1    | c.842G>A(p.R281Q)     | MISSENSE         |
| P118 | CASP8   | c.1232C>T(p.P411L)    | MISSENSE         |
| P119 | IFNB1   | c.305A>C(p.E102A)     | MISSENSE         |
| P119 | ARID1A  | c.688delG(p.A230Rfs*) | FRAMESHIFT       |
| P119 | BRAF    | c.784C>A(p.Q262K)     | MISSENSE         |
| P119 | PKHD1   | c.6951G>T(p.L2317F)   | MISSENSE         |
| P119 | APC     | c.2825delA(p.N942Ifs) | FRAMESHIFT       |
| P119 | NRAS    | c.181C>A(p.Q61K)      | MISSENSE         |
| P119 | SMAD2   | c.1395C>A(p.S465R)    | MISSENSE         |
| P119 | CDC73   | c.1208C>G(p.T403S)    | MISSENSE         |
| P119 | APC     | c.4393_4394delAG(p.   | FRAMESHIFT       |
| P119 | ARID1B  | c.6413T>G(p.L2138R)   | MISSENSE         |
| P119 | AMER1   | c.1372_1373delAG(p.   | FRAMESHIFT       |
| P119 | TAP2    | c.1187T>C(p.L396P)    | MISSENSE         |
| P120 | TP53    | c.1052delA(p.K351Rfs) | FRAMESHIFT       |
| P120 | FBXW7   | c.1739A>G(p.H580R)    | MISSENSE         |
| P120 | KRAS    | c.35G>A(p.G12D)       | MISSENSE         |
| P120 | SMARCA4 | c.2681C>T(p.T894M)    | MISSENSE         |
| P120 | APC     | c.3927_3931delAAAG    | FRAMESHIFT       |
| P120 | TP53    | c.844C>T(p.R282W)     | MISSENSE         |
| P120 | VEGFA   |                       | Amplification    |
| P120 | APC     | c.3055G>T(p.G1019X)   | STOP GAINED      |
| P120 | GRIN2A  | c.2084G>A(p.R695Q)    | MISSENSE         |
| P120 | ERBB2   | c.2033G>A(p.R678Q)    | MISSENSE         |
| P121 | TUBB4A  | c.811G>A(p.A271T)     | MISSENSE         |
| P121 | TEK     | c.2957C>T(p.S986F)    | MISSENSE         |
| P121 | TP53    | c.1010G>T(p.R337L)    | MISSENSE         |
| P121 | CTNNB1  | c.12_215del           | LARGE FRAGMENT D |

|      |        |                                  |             |
|------|--------|----------------------------------|-------------|
| P122 | KRAS   | c.35G>C(p.G12A)                  | MISSENSE    |
| P122 | STK11  | c.998G>A(p.R333H)                | MISSENSE    |
| P122 | APC    | EPB41L4A:exon9~APC:ε             | FUSION      |
| P122 | TP53   | c.227_279del(p.A76Vfs)           | FRAMESHIFT  |
| P122 | SMAD4  | c.1081C>T(p.R361C)               | MISSENSE    |
| P123 | TP53   | c.524G>A(p.R175H)                | MISSENSE    |
| P123 | APC    | c.3957dupT(p.V1320Cfs)           | FRAMESHIFT  |
| P123 | PTEN   |                                  | Deletion    |
| P123 | NRAS   | c.182A>G(p.Q61R)                 | MISSENSE    |
| P123 | PTEN   |                                  | Deletion    |
| P124 | SMAD4  | SMAD4:exon5~IGR (d               | FUSION      |
| P124 | EZH2   | c.758C>A(p.P253Q)                | MISSENSE    |
| P124 | KMT2A  | c.8264T>C(p.I2755T)              | MISSENSE    |
| P124 | DICER1 | c.3661A>T(p.N1221Y)              | MISSENSE    |
| P124 | NOTCH1 | c.1270G>A(p.E424K)               | MISSENSE    |
| P124 | TP53   | c.690delC(p.T231Pfs*)            | FRAMESHIFT  |
| P124 | KDR    | c.2571C>A(p.D857E)               | MISSENSE    |
| P124 | KRAS   | c.35G>A(p.G12D)                  | MISSENSE    |
| P124 | FAT1   | c.4035G>A(p.W1345 <sup>Δ</sup> ) | STOP GAINED |
| P125 | PIK3CA | c.353G>A(p.G118D)                | MISSENSE    |
| P125 | APC    | c.1659delG(p.W553Cfs)            | FRAMESHIFT  |
| P125 | DDR2   | c.1894C>G(p.L632V)               | MISSENSE    |
| P125 | APC    | c.4666dupA(p.T1556Nfs)           | FRAMESHIFT  |
| P125 | NTRK3  | c.1934G>A(p.R645H)               | MISSENSE    |
| P125 | AMER1  | c.368T>A(p.L123*)                | STOP GAINED |
| P125 | KRAS   | c.38G>A(p.G13D)                  | MISSENSE    |
| P125 | TP53   | c.558_559delTG(p.D18fs)          | FRAMESHIFT  |
| P126 | ERBB4  | c.3222A>C(p.E1074D)              | MISSENSE    |
| P126 | APC    | c.4216C>T(p.Q1406*)              | STOP GAINED |
| P126 | CDK12  | CDK12:exon1~RPTOR                | FUSION      |
| P126 | TP53   | c.272G>A(p.W91*)                 | STOP GAINED |
| P127 | MLLT3  | c.1049C>G(p.S350X)               | STOP GAINED |
| P127 | CDH1   | c.1320G>T(p.K440N)               | MISSENSE    |
| P127 | KRAS   | c.436G>A(p.A146T)                | MISSENSE    |
| P127 | IGF1R  | c.2278G>A(p.A760T)               | MISSENSE    |
| P127 | BRD4   | c.3796G>A(p.E1266K)              | MISSENSE    |
| P127 | TP53   | c.366_373dupGACTTGC              | FRAMESHIFT  |
| P127 | MAX    | c.453C>A(p.S151R)                | MISSENSE    |
| P127 | NRG1   | c.805T>C(p.Y269H)                | MISSENSE    |
| P127 | AXIN2  | c.799_800delGT(p.V26fs)          | FRAMESHIFT  |
| P127 | RARA   | c.1072G>T(p.A358S)               | MISSENSE    |
| P127 | ESR1   | c.338C>T(p.P113L)                | MISSENSE    |
| P127 | SMAD2  | c.215C>A(p.T72N)                 | MISSENSE    |
| P127 | CREBBP | c.1714G>T(p.G572X)               | STOP GAINED |
| P127 | EP300  | c.3590G>T(p.R1197M)              | MISSENSE    |
| P127 | ROS1   | c.1792T>A(p.F598I)               | MISSENSE    |

|      |           |                        |               |
|------|-----------|------------------------|---------------|
| P128 | PIK3R1    | c.1392_1403delTAGAT    | INFRAME INDEL |
| P128 | NTRK1     | c.310C>T(p.R104C)      | MISSENSE      |
| P128 | KRAS      | c.38G>A(p.G13D)        | MISSENSE      |
| P128 | MED12     | c.117_134delGAATGTA    | INFRAME INDEL |
| P128 | SMAD4     | c.1082G>A(p.R361H)     | MISSENSE      |
| P128 | RNF43     | c.1A>T(p.M1?)          | START LOST    |
| P128 | GNAS      | c.1631G>A(p.R544Q)     | MISSENSE      |
| P129 | CEP57     | p.P470H (c.C1409A)     | MISSENSE      |
| P129 | TP53      | p.I195T (c.T584C)      | MISSENSE      |
| P129 | KRAS      | p.G12D (c.G35A)        | MISSENSE      |
| P129 | APC       | p.R1450X (c.C4348T)    | STOP GAINED   |
| P129 | CEP57     | p.P470H (c.C1409A)     | MISSENSE      |
| P129 | KRAS      | p.G12D (c.G35A)        | MISSENSE      |
| P129 | TP53      | p.I195T (c.T584C)      | MISSENSE      |
| P129 | APC       | p.R1450X (c.C4348T)    | STOP GAINED   |
| P130 | DPYD      | c.299T>C(p.F100S)      | MISSENSE      |
| P130 | KRAS      | c.35G>T(p.G12V)        | MISSENSE      |
| P130 | APC       | c.675_680delAAAGGA(    | INFRAME INDEL |
| P130 | PTPRD     | c.4987A>G(p.S1663G)    | MISSENSE      |
| P130 | APC       | c.2083C>T(p.Q695*)     | STOP GAINED   |
| P130 | FBXW7     | c.1513C>T(p.R505C)     | MISSENSE      |
| P130 | FBXW7     | c.832C>T(p.R278*)      | STOP GAINED   |
| P130 | PIK3CA    | c.1633G>A(p.E545K)     | MISSENSE      |
| P130 | SMAD4     | c.1067C>T(p.P356L)     | MISSENSE      |
| P130 | APC       | c.4348C>T(p.R1450*)    | STOP GAINED   |
| P130 | IFNGR1    | c.45C>G(p.S15R)        | MISSENSE      |
| P130 | STAG2     | c.1865A>C(p.K622T)     | MISSENSE      |
| P131 | APC       | c.4099C>T(p.Q1367X)    | STOP GAINED   |
| P131 | TNFRSF11A | c.400G>A(p.A134T)      | MISSENSE      |
| P131 | SMARCB1   |                        | Deletion      |
| P131 | TP53      |                        | Deletion      |
| P131 | TP53      | c.524G>A(p.R175H)      | MISSENSE      |
| P132 | BRD4      | p.R1130L (c.G3389T)    | MISSENSE      |
| P132 | CTNNB1    | p.Q302fs (c.905delA)   | FRAMESHIFT    |
| P132 | FANCC     | p.T420M (c.C1259T)     | MISSENSE      |
| P132 | NOTCH2    | p.R1931H (c.G5792A)    | MISSENSE      |
| P132 | POLH      | p.R234H (c.G701A)      | MISSENSE      |
| P132 | SLC3A2    | p.K298fs (c.892delA)   | FRAMESHIFT    |
| P132 | ABCB1     | p.V125fs (c.373_374ins | FRAMESHIFT    |
| P132 | CDA       | p.A101V (c.C302T)      | MISSENSE      |
| P132 | GNAS      | p.D141G (c.A422G)      | MISSENSE      |
| P132 | STAT3     | p.V310M (c.G928A)      | MISSENSE      |
| P132 | PDGFRB    | p.A168T (c.G502A)      | MISSENSE      |
| P132 | EP300     | p.Q1522H (c.G4566T)    | MISSENSE      |
| P132 | NTRK3     | p.D476G (c.A1427G)     | MISSENSE      |
| P132 | FAT1      | p.T874P (c.A2620C)     | MISSENSE      |
| P132 | CCNE1     | p.E45A (c.A134C)       | MISSENSE      |

|      |         |                             |             |
|------|---------|-----------------------------|-------------|
| P132 | MDM2    | p.P319fs (c.955delC)        | FRAMESHIFT  |
| P132 | HDAC9   | p.R440H (c.G1319A)          | MISSENSE    |
| P132 | CDK6    | p.R214H (c.G641A)           | MISSENSE    |
| P132 | FANCD2  | c.A2495-2G                  | SPLICE      |
| P132 | FBXW7   | p.R441Q (c.G1322A)          | MISSENSE    |
| P132 | APC     | p.R1788C (c.C5362T)         | MISSENSE    |
| P132 | FANCA   | p.A1443T (c.G4327A)         | MISSENSE    |
| P132 | ERBB2IP | p.D947V (c.A2840T)          | MISSENSE    |
| P132 | ATRX    | p.R1518K (c.G4553A)         | MISSENSE    |
| P132 | MYCN    | p.A354V (c.C1061T)          | MISSENSE    |
| P132 | KDR     | p.V665M (c.G1993A)          | MISSENSE    |
| P132 | MAP3K1  | p.R208X (c.C622T)           | STOP GAINED |
| P132 | TP53    | p.R213Q (c.G638A)           | MISSENSE    |
| P132 | APC     | p.K1462fs (c.4384_4385delC) | FRAMESHIFT  |
| P132 | SGK1    | p.G234X (c.G700T)           | STOP GAINED |
| P132 | GRM8    | p.359fs (c.1077_1078insC)   | FRAMESHIFT  |
| P132 | HGF     | c.G747-1T                   | SPLICE      |
| P132 | SETBP1  | p.Q1213R (c.A3638G)         | MISSENSE    |
| P132 | EPHA5   | p.C102Y (c.G305A)           | MISSENSE    |
| P132 | SMARCA4 | p.G19D (c.G56A)             | MISSENSE    |
| P132 | CREBBP  | p.R2344W (c.C7030T)         | MISSENSE    |
| P132 | IKBKE   | p.A338V (c.C1013T)          | MISSENSE    |
| P132 | MLLT4   | p.M85V (c.A253G)            | MISSENSE    |
| P132 | BRCA2   | p.G602fs (c.1806delA)       | FRAMESHIFT  |
| P132 | IDH1    | p.I99M (c.A297G)            | MISSENSE    |
| P132 | PTCH1   | p.V1126I (c.G3376A)         | MISSENSE    |
| P132 | MUTYH   | p.R414C (c.C1240T)          | MISSENSE    |
| P132 | SMO     | p.H692fs (c.2076delC)       | FRAMESHIFT  |
| P132 | MPL     | p.H624N (c.C1870A)          | MISSENSE    |
| P132 | MITF    | p.A277T (c.G829A)           | MISSENSE    |
| P132 | IGF1R   | p.R391H (c.G1172A)          | MISSENSE    |
| P132 | ERCC4   | p.F761L (c.T2283G)          | MISSENSE    |
| P132 | FLT3    | p.S633G (c.A1897G)          | MISSENSE    |
| P132 | NTRK1   | p.Y72H (c.T214C)            | MISSENSE    |
| P132 | RPTOR   | p.V596M (c.G1786A)          | MISSENSE    |
| P132 | ARID1A  | p.R1461X (c.C4381T)         | STOP GAINED |
| P132 | TTF1    | p.K274fs (c.821delA)        | FRAMESHIFT  |
| P132 | FBXW7   | p.G670X (c.G2008T)          | STOP GAINED |
| P132 | GATA6   | p.G305D (c.G914A)           | MISSENSE    |
| P132 | GNA11   | p.E49K (c.G145A)            | MISSENSE    |
| P132 | CREBBP  | p.D1143G (c.A3428G)         | MISSENSE    |
| P132 | ASXL1   | p.G642fs (c.1926_1927delA)  | FRAMESHIFT  |
| P132 | AXL     | p.63fs (c.189_190insC)      | FRAMESHIFT  |
| P132 | JARID2  | p.M683I (c.G2049A)          | MISSENSE    |
| P132 | CBLB    | p.G661R (c.G1981A)          | MISSENSE    |
| P132 | TAP1    | p.V254A (c.T761C)           | MISSENSE    |
| P132 | PTPN13  | p.P225H (c.C674A)           | MISSENSE    |

|      |          |                        |             |
|------|----------|------------------------|-------------|
| P132 | FANCL    | p.T304A (c.A910G)      | MISSENSE    |
| P132 | APC      | p.R805X (c.C2413T)     | STOP GAINED |
| P132 | DNMT3A   | p.R209H (c.G626A)      | MISSENSE    |
| P132 | MTOR     | p.R460X (c.C1378T)     | STOP GAINED |
| P132 | CTNNB1   | p.R542C (c.C1624T)     | MISSENSE    |
| P132 | KIT      | p.P627L (c.C1880T)     | MISSENSE    |
| P132 | WRN      | p.E3fs (c.8delA)       | FRAMESHIFT  |
| P132 | FANCI    | p.1268_1269del (c.380: | STOP LOST   |
| P132 | CBLB     | p.A971T (c.G2911A)     | MISSENSE    |
| P132 | RRM1     | p.R499H (c.G1496A)     | MISSENSE    |
| P132 | NTRK2    | p.R734C (c.C2200T)     | MISSENSE    |
| P132 | RECQL4   | p.M748L (c.A2242T)     | MISSENSE    |
| P132 | JARID2   | p.K565R (c.A1694G)     | MISSENSE    |
| P132 | PDGFRB   | p.T369M (c.C1106T)     | MISSENSE    |
| P132 | NOTCH1   | p.R1762W (c.C5284T)    | MISSENSE    |
| P132 | MAP3K4   | p.K158fs (c.472delA)   | FRAMESHIFT  |
| P132 | MSH6     | p.P59S (c.C175T)       | MISSENSE    |
| P132 | ROS1     | p.P1315H (c.C3944A)    | MISSENSE    |
| P132 | RPTOR    | p.A1269T (c.G3805A)    | MISSENSE    |
| P132 | XPC      | p.A783T (c.G2347A)     | MISSENSE    |
| P132 | MLH3     | p.K585fs (c.1755delA)  | FRAMESHIFT  |
| P132 | RPTOR    | p.V1147I (c.G3439A)    | MISSENSE    |
| P132 | ERBB4    | p.S701N (c.G2102A)     | MISSENSE    |
| P132 | GRIN2A   | p.L63P (c.T188C)       | MISSENSE    |
| P132 | KRAS     | p.G13D (c.G38A)        | MISSENSE    |
| P132 | KDM5A    | p.K1199fs (c.3597_359: | FRAMESHIFT  |
| P132 | AXIN2    | p.A684V (c.C2051T)     | MISSENSE    |
| P132 | POLE     | p.L2096V (c.C6286G)    | MISSENSE    |
| P132 | LZTR1    | p.L816Q (c.T2447A)     | MISSENSE    |
| P132 | SMARCB1  | p.A109fs (c.327_328del | FRAMESHIFT  |
| P132 | SMARCA4  | p.A1168T (c.G3502A)    | MISSENSE    |
| P132 | ATM      | p.I2230V (c.A6688G)    | MISSENSE    |
| P132 | SMARCA4  | p.R425Q (c.G1274A)     | MISSENSE    |
| P132 | PIK3R1   | p.G644D (c.G1931A)     | MISSENSE    |
| P132 | PARK2    | p.L112F (c.C334T)      | MISSENSE    |
| P132 | MGMT     | p.L2P (c.T5C)          | MISSENSE    |
| P132 | TP53     | p.R158H (c.G473A)      | MISSENSE    |
| P132 | TTF1     | p.H285R (c.A854G)      | MISSENSE    |
| P132 | ATR      | p.A1570T (c.G4708A)    | MISSENSE    |
| P132 | C11ORF30 | p.G923D (c.G2768A)     | MISSENSE    |
| P132 | MAP3K4   | p.R346C (c.C1036T)     | MISSENSE    |
| P132 | PALB2    | p.M296fs (c.886delA)   | FRAMESHIFT  |
| P132 | BAX      | p.M38fs (c.114delG)    | FRAMESHIFT  |
| P132 | TOP2A    | p.P8H (c.C23A)         | MISSENSE    |
| P132 | RAF1     | p.A142V (c.C425T)      | MISSENSE    |
| P132 | FAT1     | p.V1783M (c.G5347A)    | MISSENSE    |
| P132 | CDKN1A   | p.F51V (c.T151G)       | MISSENSE    |

|      |        |                     |             |
|------|--------|---------------------|-------------|
| P132 | DUSP2  | p.A64T (c.G190A)    | MISSENSE    |
| P133 | NF1    | p.D1313V (c.A3938T) | MISSENSE    |
| P133 | PGR    | p.C480S (c.G1439C)  | MISSENSE    |
| P133 | APC    | p.S1327X (c.C3980G) | STOP GAINED |
| P133 | APC    | p.Q1406X (c.C4216T) | STOP GAINED |
| P133 | ESR1   | p.P333S (c.C997T)   | MISSENSE    |
| P133 | HNF1A  | p.S225C (c.A673T)   | MISSENSE    |
| P133 | KRAS   | p.Q61R (c.A182G)    | MISSENSE    |
| P133 | PDGFRB | p.A789S (c.G2365T)  | MISSENSE    |
| P133 | TP53   | p.R273H (c.G818A)   | MISSENSE    |
| P133 | FLT4   | p.G276D (c.G827A)   | MISSENSE    |
